# Supplementary material for: The Sorghum bicolor genome and the diversification of grasses
Source: Springer Nature journal article supplement (doi:10.1038/nature07723), 2009-01-01
Supplement: 41586_2009_BFnature07723_MOESM287_ESM.pdf [file 41586_2009_BFnature07723_MOESM287_ESM.pdf]

## Methods

**Genome sequencing and assembly.** Approximately 8.5-fold redundant paired-end shotgun sequencing was performed using standard Sanger methodologies from small (~2-3 kb), and medium (5-8 kb) insert plasmid libraries, one fosmid library (~35 kb inserts), and two BAC libraries (insert size 90 and 108 kb). (Supplementary Note 1.)

**Integration of shotgun assembly with genetic and physical maps.** The largest 201 scaffolds, all larger than 39 kbp, excluding “N”s, and collectively representing 678,902,941 bp or 97.3% of all nucleotides, were checked for possible chimeras based on 5 independent lines of evidence, namely the sorghum genetic map, physical map, abrupt changes in gene or repeat density, rice gene order, and coverage by BAC or fosmid clones, as detailed in Supplemental Note 2.

**Repeat analysis.** *De novo* searches were performed for LTR retrotransposons using LTR\_STRUCT (pmid 12584121). *De novo* detection of CACTA-DNA transposons and MITEs used custom programs (Supplemental Note 3). Known repeats were identified by RepeatMasker (Open-3-1-8) ([www.repeatmasker.org](http://www.repeatmasker.org)) with mips-REdat\_6.2\_Poaceae, a customized compilation of grass repeats that contained the new sorghum-specific LTR retrotransposons ([mips.gsf.de/proj/plant/webapp/recat/](http://mips.gsf.de/proj/plant/webapp/recat/)). The insertion age of full length LTR-retrotransposons was determined from the evolutionary distance between 5' and 3' soloLTR derived from a ClustalW alignment of the two soloLTRs.

**Protein-coding gene annotation.** Putative protein-coding loci were identified based on BLAST<sup>1</sup> alignments of rice and Arabidopsis peptides and expressed sequence tags (ESTs) from sorghum and maize. The homology-based gene finder GenomeScan<sup>2</sup> was applied using maize-specific parameters. Predicted coding structures were merged with EST data from maize and sorghum using PASA<sup>3</sup>.

**Inter- and intra-genomic alignments.** Comparative dot plots used ColinearScan<sup>4</sup> and multi-alignments used MCScan<sup>5</sup>, applied to RAP2<sup>33</sup> (mapped representative models, 29389 loci) and *Sorghum bicolor* sbi1.4 annotation set (34496 loci). Pairwise BLASTP ( $E < 1e-5$ , top five hits), both within each genome and between the two genomes was used to retrieve potential anchors. *Zea* BAC sequences and FPC contig coordinates were downloaded from the Maize Genome Browser (<http://www.maizesequence.org>, release Jan. 7, 2008). *Sorghum* coding sequences were searched against *Zea* BACs for potential orthologous *Zea* genes using translated BLAT<sup>6</sup> with minimum score 100.

## Supplemental Materials

Methods Summary..... pg. 1

Figure S1. Evolutionary context of sorghum and distinguishing features of the Saccharinae..... pg. 5

Supplemental Note 1. Genome sequencing data..... pg. 6

S1.1 DNA source and material preparation

S1.2 shotgun library preparation (plasmid and fosmid)

S1.3 BAC library sequencing

Table S1. Shotgun sequencing statistics summary

Supplemental Note 2. Genome assembly and map integration..... pg. 7

S2.1 Arachne assembly of whole genome shotgun dataset

Table S2. Final summary statistics, map-integrated Arachne2 assembly

S2.2 Manual curation of assembly and integration of map data

Table S3: Sequence scaffold breaks made based on comparisons with physical map

Table S4: Scaffold joins to reconstruct chromosomes, based on physical and genetic map

S2.3 Telomeres

S2.4 Completeness of assembly

S2.5 Accuracy of the assembly in genic and repetitive regions

Table S5. Comparison of the WGS assembly to randomly chosen BAC clones

S2.6 Reconciliation of the assembly with genetic and physical maps, stress-testing based on synteny, and chromosome identification.

Figure S2: Example of WGS assembly verification on one scaffold, and assembly of scaffolds into chromosomes.

Table S6: Evidence for each scaffold join in chromosome assembly

Table S7: Genome size evolution and distribution of recombination in sorghum, rice, and maize

S2.7 Organellar sequences

Table S8: Length and distribution of chloroplast DNA insertions on the Sorghum chromosomes

Table S9: Length and distribution of mitochondrial DNA insertions on the Sorghum chromosomes

S2.8 CpG Island Detection

Supplemental Note 3. Repeat identification and characterization..... pg. 24

S3.1 Identification of LTR-retrotransposons

Figure S3: Timing of LTR-Retrotransposon Insertions

S3.2 MITEs

S3.2 Masking based on known repetitive sequences

**S3.3 Masking based on over-represented 16-mers****Table S10: Repeat composition and major components of the sorghum genome in comparison to rice and maize****Table S11. Repeat composition by type****Table S12. Repetitive content per chromosome****S3.4 CACTA Search Strategy****Figure S4. Dotplot of a small non-autonomous CACTA element sequence compared with itself****S3.5 Helitron identification****Table S13: Helitrons in sorghum and maize****S3.6 Tandem repeats****Table S14: Tandem repeats****S3.7 Repeat annotation and data integration****Figure S5: Genomic landscape of sorghum****Supplemental Note 4. Gene annotation and analysis..... pg. 35****S4.1 Structural gene calls in the Sorghum genome****S4.2 Gene identifiers****S4.3. Tandem gene clusters in sorghum****S4.4 Sorghum miRNA gene annotation****Table S15: miRNAs present in the Sorghum genome****Table S16: Position of known Sorghum miRNAs in the genome****Table S17: Position of newly detected miRNAs (paralog mapping) in the Sorghum genome****S4.5 Rice annotations for comparative analysis****S4.5.1 Filtering of RAP2 rice annotation data****S4.5.2 TIGR5 gene set for rice****S4.6 Protein domains in the Sorghum genome****Table S18: Over- and underrepresented PFAM domains in the genome of *Sorghum bicolor*****S4.7 Protein family comparison across angiosperms****S4.8 Sorghum specific protein families****Table S19: Over- and underrepresented PFAM domains of *Sorghum* specific protein families****Supplemental Note 5. Gene structure and comparison with rice..... pg. 48****S5.1 Coding exon length distributions for sorghum (red) and rice (green)****Figure S6. Coding exon length distributions for sorghum (red) and rice (green)****Table S20: Statistics of sorghum gene composition****Figure S7. Nucleotide identity between sorghum transcripts and sugarcane (blue), maize (green), and rice (red) (based on assembled ESTs)****S5.3 Nucleotide identity between sorghum transcripts and sugarcane (blue), maize (green), and rice (red) (based on assembled ESTs)****S5.4 CISP identification**

- Supplemental Note 6. Identification and characterization of segments of conserved synteny..... pg. 50**  
Figure S8. Global dot-plot of *Oryza - Sorghum* and *Sorghum - Sorghum* genome alignments  
S6.1 Pfam domains enriched in singleton or syntenic duplicated genes of sorghum
- Supplemental Note 7. Timing and characterization of grass-specific genome duplication..... pg. 53**
- Supplemental Note 8. DNA alignments..... pg. 54**  
Table S21: Coverage of different interval of the sorghum genome by the alignments with the rice v.5.0 genome and 1.55Gbp of Maize BACs  
Figure S9: Multiple VISTA conservation tracks among syntenic regions of plants  
Figure S10: Grass conserved noncoding sequences (CNSs) are often far removed from the genes with which they associate
- Supplemental Note 9. Evolution of C4 photosynthesis genes..... pg. 57**  
Table S22a. C4 genes identified in the sorghum genome  
Table S22b. Sorghum C4 genes, their isoforms, and their corresponding rice orthologs  
Figure S11: Phylogeny of photosynthesis enzyme genes and their isoforms in sorghum, rice and maize
- Supplemental Note 10. Evolution of cell wall synthesis genes..... pg. 62**  
Table S23. Comparative cell wall gene families of Arabidopsis, rice, sorghum, and maize  
Figure S12. Cellulose synthase superfamily dendrogram for Arabidopsis, rice and sorghum.  
Figure S13. GT31 dendrogram for Arabidopsis, rice, and sorghum.
- Supplemental Note 11. Sorghum-sugarcane microcolinearity. .... pg. 66**  
Figure S14. Collinear alignment between sugarcane BAC sequences and their sorghum counterparts  
Figure S15. Tandem gene duplication in the sugarcane or sorghum genome
- Supplemental Note 12. Yield of sorghum and other crops.... pg. 69**  
Figure S14. Average worldwide yields of major grain crops.
- Supplemental References ..... pg.70**

**Figure S1. Evolutionary context of sorghum and distinguishing features of the Saccharinae.** Branch lengths above the species level were computed by aligning EST assemblies from the TIGR PlantTA collection (plantta.tigr.org), and estimating the transversion rate at fourfold synonymous sites using a Jukes-Cantor correction for multiple transversions, and creating a phylogenetic tree with the neighbor-joining method as implemented in Phylip (evolution.genetics.washington.edu/phylip.html). Phylogenetic interpretation is from <sup>7</sup>; the ranges of genome size estimates are from <sup>8</sup> and direct measurements by flow cytometry (*S. propinquum*, *Miscanthus spp.*).

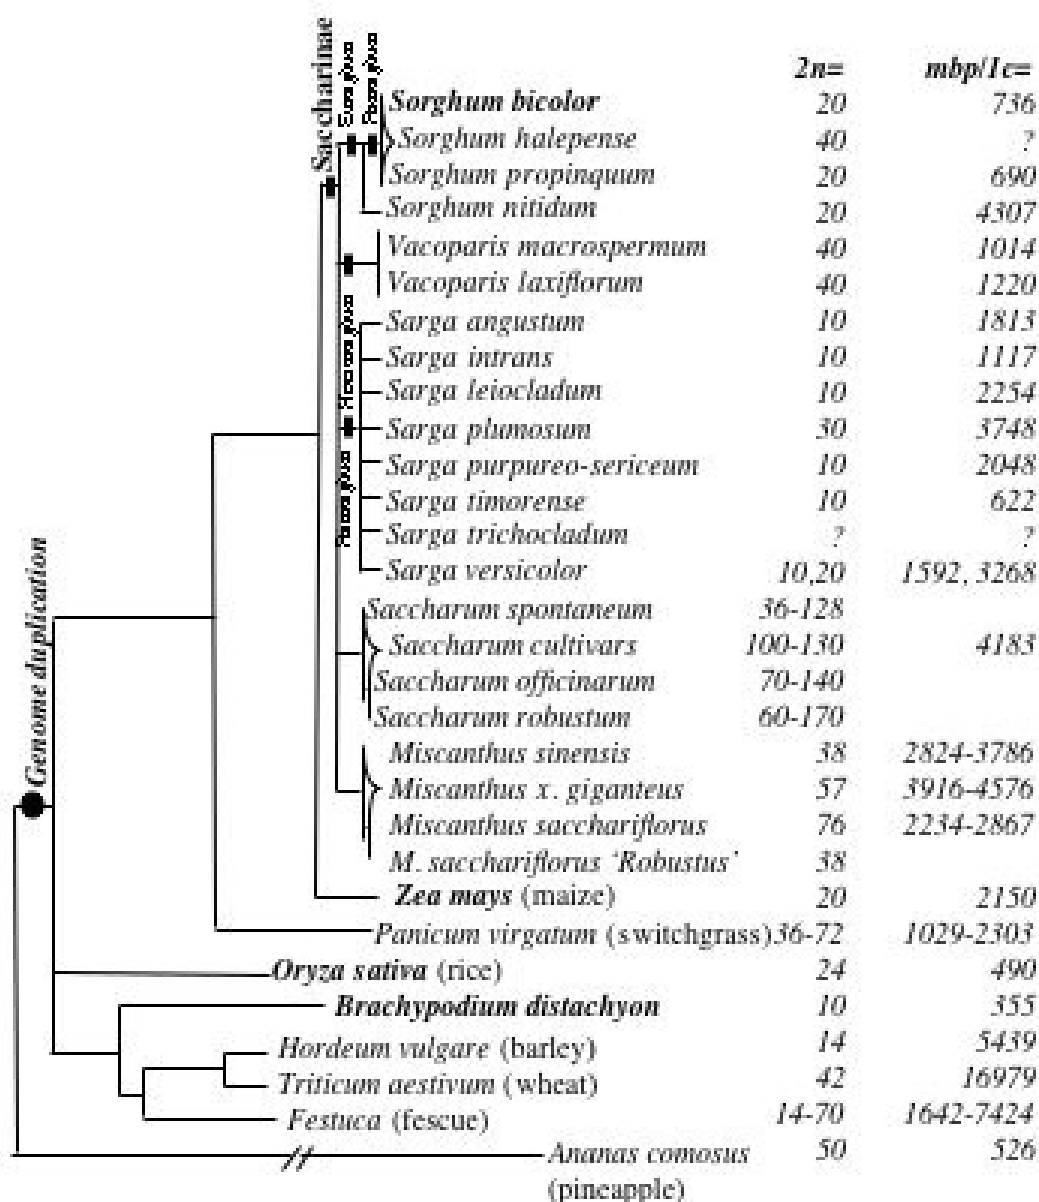

## Supplemental Note 1. Genome sequencing details

We sequenced the genotype BTx623, a largely-homozygous breeding line released by Texas A&M University<sup>9</sup>, which figures in the pedigrees of many elite sorghum genotypes and has been widely used in sorghum genomics research.

### S1.1 DNA source and material preparation

Nuclear DNA was isolated from sorghum BTx623 seedlings as described<sup>10</sup> with minor modifications (see [http://www.mgel.msstate.edu/pdf/nucl\\_dna.pdf](http://www.mgel.msstate.edu/pdf/nucl_dna.pdf)). To remove potential carbohydrate contaminants that may have precipitated with the DNA, the isolated nuclear DNA was dissolved in 0.03 M sodium phosphate buffer (SPB) and loaded onto a hydroxyapatite column equilibrated with 0.03 M SPB. The DNA was washed with 10 column volumes of 0.03 M SPB and 10 column volumes of 0.12 M SPB, and then the DNA was eluted from the column by the addition of 0.5 M SPB<sup>11</sup> for procedures associated with hydroxyapatite chromatography). The nuclear DNA was transferred into 10 mM Tris buffer (pH 8.0) using a Centriplus YM-30 column (Millipore, Billerica, MA USA).

### S1.2 shotgun library preparation and sequencing (plasmid and fosmid)

Plasmid- and fosmid-end sequencing was performed using standard library protocols and Sanger dye-terminator chemistries on the ABI-3730 and MegaBACE 4000 sequencing instruments. Sequencing totals are shown in Table S1, with insert sizes estimated self-consistently from the shotgun assembly using Arachne2<sup>12</sup>. Sequence coverage is computed by counting the phred20 bases for each aligned trace and dividing that number by the assembled consensus bases. This avoids a priori estimates of the genome size, although collapsed repeats can still lead to an overestimate of coverage. In this calculation, scaffolds that fall outside of the normal coverage range are ignored. High quality (HQ) reads are longer than 200 bp free of vector sequence and with PhredQ>20. All traces for this project were deposited in the NCBI Trace Archive.

### S1.3 BAC libraries and sequencing

A ~11x BAC library for BTx623 was prepared and fingerprinted previously, also hybridizing overgo probes from most genetically-mapped sequence tagged sites to the BACs to align the physical and genetic maps<sup>13</sup>. Paired-end sequences for total of 96,870 BAC clones (spanning 10.31 Gb ~ 13.5X clone coverage) were generated herein using standard chemistries on ABI-3730 sequencing instruments. All traces for this project were deposited in the NCBI Trace Archive.

**Table S1. Shotgun sequencing summary statistics**

| Library Type      | Insert Size (kbp) | Total Reads       | Sequence Coverage | Reads <200 Phred 20s | All Vector Reads | Unpaired HQ Reads | Paired HQ Reads  |
|-------------------|-------------------|-------------------|-------------------|----------------------|------------------|-------------------|------------------|
| Small insert      | 2.44+/-0.39       | 4,817,407         | 3.74x             | 363,104              | 102,781          | 236,912           | 4,114,610        |
| Medium Insert I   | 6.40+/- 0.53      | 2,661,374         | 2.32x             | 137,325              | 82,071           | 67,246            | 2,374,732        |
| Medium Insert II  | 6.881+/-0.59      | 2,149,803         | 1.72x             | 179,628              | 68,125           | 89,976            | 1,812,074        |
| Medium Insert III | 8.61+/-0.76       | 18,144            | 0.01x             | 1,048                | 293              | 695               | 16,108           |
| Fosmid            | 34.7+/-3.8        | 850,443           | 0.52x             | 172,321              | 8,826            | 63,234            | 606,062          |
| BAC/SB_BBc        | 108.0+/-21.8      | 193,920           | 0.17x             | 8,791                | 3,563            | 4,822             | 176,744          |
| BAC/SB_BBd        | 91.0+/-25.0       | 26,112            | 0.02x             | 3,613                | 4,182            | 1,321             | 16,996           |
| <b>Total</b>      |                   | <b>10,717,203</b> | <b>8.50x</b>      | <b>865,830</b>       | <b>269,841</b>   | <b>464,206</b>    | <b>9,117,326</b> |

We note in the text that the sequenced clones are “spanning a ~100-fold range of insert sizes”. This parameter can be estimated in several ways. Based on the average insert size of the respective clone libraries, the range would be 44-fold. However, there are many plasmids that are less than 2 kb, and some BACs that are more than 200 kb. Based on the extremes, the range approaches ~200x, however these extremes pertain to very limited data and therefore seem inappropriate. Accordingly, we consider the ~100-fold estimate to be a reasonable representation of the data.

## S2. Genome assembly and map integration

### S2.1 Arachne assembly of whole genome shotgun dataset

An initial whole genome shotgun (WGS) assembly was built with Arachne2<sup>12</sup> v.20060705 with 48-mers that occurred 65 or more times in the dataset considered repetitive; no error correction; and the option to remove and replace reads deemed wholly repetitive. We made modifications to the repeat identification process to allow Arachne2 to better identify and correct misassembled repetitive elements.

This Whole Genome Shotgun project has been deposited at DDBJ/EMBL/GenBank under the project accession ABXC00000000. The version described in this paper is the first version, ABXC01000000, denoted Sbi1 herein. A preliminary assembly using only a partial dataset was made available at phytozome in January 2007. This “Sbio” assembly was transient and is superseded by Sbi1. All analyses in this manuscript refer to the Sbi1 assembly.



**Table S2. Final summary statistics, map-integrated Arachne2 assembly.**

Main genome contig total: 12,873

Main genome contig N/L50: 958 contigs longer than 195.4 KB

Main genome contig sequence total: 697.6 MB

Main genome scaffold total: 3,304

Main genome scaffold N/L50: 6 scaffolds longer than 62.4 MB

Main genome scaffold sequence total: 738.5 MB

These scaffolds include 24.2 MB of centromere spacers.

The estimated gap % without centromere spacers is 2.35%.

After breaking at the 28 points of incongruity with the physical map (see below), the contig N50 is 1,013 and L50 is 187.1 kb; the scaffold N50 is 35 and L50 is 7.0 Mbp.

| Minimum Scaffold Length | Number of Scaffolds | Number of Contigs | Total Sequence Size* | Total Non-Gap Bases | %Scaffold Size in Non-Gaps |
|-------------------------|---------------------|-------------------|----------------------|---------------------|----------------------------|
| All                     | 3,304               | 12,873            | 738,540,932          | 697,579,688         | 94.45%                     |
| 1 kb                    | 3,304               | 12,873            | 738,540,932          | 697,579,688         | 94.45%                     |
| 2.5 kb                  | 3,070               | 12,602            | 738,070,256          | 697,126,337         | 94.45%                     |
| 5 kb                    | 1,247               | 10,294            | 731,651,470          | 690,813,104         | 94.42%                     |
| 10 kb                   | 604                 | 9,334             | 727,157,266          | 686,514,747         | 94.41%                     |
| 25 kb                   | 170                 | 8,620             | 720,919,732          | 680,464,262         | 94.39%                     |
| 50 kb                   | 122                 | 8,475             | 719,160,869          | 679,159,609         | 94.44%                     |
| 100 kb                  | 83                  | 8,281             | 716,381,796          | 677,191,673         | 94.53%                     |
| 250 kb                  | 47                  | 7,947             | 710,617,843          | 672,901,797         | 94.69%                     |
| 500 kb                  | 32                  | 7,694             | 705,483,650          | 669,211,941         | 94.86%                     |
| 1 Mb                    | 19                  | 7,356             | 696,834,577          | 662,602,196         | 95.09%                     |
| 2.5 Mb                  | 15                  | 7,208             | 690,721,313          | 656,841,816         | 95.10%                     |
| 5 Mb                    | 13                  | 7,084             | 682,507,325          | 648,764,287         | 95.00%                     |

\* Includes estimated centromere gap bases.

**S2.2 Manual curation of assembly and integration of map data**

After the Arachne assembly, 28 breaks (See S2.4 below) were made and 117 manual joins were made. These include ten gaps inserted for unassembled centromeres based on genetic and physical map data. The size of the centromere was estimated for each chromosome based upon the amount of centromeric sequence already assembled for that chromosome. The main genome is in 10 chromosomes along with ~3,000 small unmapped pieces, totaling 697.6 Mb. The unmapped sequences contain fewer than ~200 bona fide protein coding genes with homology to rice genes.



**Table S3: Sequence scaffold breaks made based on comparisons with physical map.**

| <b>Scaffold number</b> | <b>End of first segment</b> | <b>Start of second segment</b> |
|------------------------|-----------------------------|--------------------------------|
| 1                      | 6,773,471                   | 6,774,471                      |
| 1                      | 16,715,462                  | 16,716,462                     |
| 1                      | 17,049,685                  | 17,050,685                     |
| 2                      | 6,769,918                   | 6,770,918                      |
| 3                      | 14,348,828                  | 14,349,828                     |
| 5                      | 6,309,929                   | 6,310,929                      |
| 7                      | 1,932,250                   | 1,933,250                      |
| 7                      | 10,109,836                  | 10,110,836                     |
| 8                      | 5,100,008                   | 5,101,008                      |
| 8                      | 12,471,542                  | 12,472,542                     |
| 11                     | 930,223                     | 931,223                        |
| 12                     | 11,445,401                  | 11,446,401                     |
| 15                     | 6,665,054                   | 6,666,054                      |
| 15                     | 8,885,477                   | 8,886,477                      |
| 21                     | 1,527,622                   | 1,528,622                      |
| 23                     | 3,601,417                   | 3,602,417                      |
| 24                     | 132,868                     | 133,868                        |
| 26                     | 398,727                     | 399,727                        |
| 28                     | 7,342,067                   | 7,343,067                      |
| 31                     | 1,632,238                   | 1,633,238                      |
| 32                     | 6,399,433                   | 6,400,433                      |
| 34                     | 4,368,763                   | 4,369,763                      |
| 46                     | 3,760,727                   | 3,761,727                      |
| 47                     | 99,836                      | 100,836                        |
| 49                     | 2,737,864                   | 2,738,864                      |
| 58                     | 4,088,464                   | 4,089,464                      |
| 65                     | 2,903,582                   | 2,904,582                      |
| 91                     | 340,379                     | 341,379                        |

**Table S4: Scaffold joins to reconstruct chromosomes, based on physical and genetic map.** Scaffold numbers represent original Arachne assembly after manual breaking. When included, decimals refer to sub-scaffolds after breaking. F and R indicate forward and reverse, respectively. The ten chromosomes are named by their chromosome numbers <sup>14</sup>, reconciled with the leading sorghum genetic maps <sup>15</sup>.

| Chromosome number | p-arm                                      | Centromere gap inserted as N's | q-arm                                                               |
|-------------------|--------------------------------------------|--------------------------------|---------------------------------------------------------------------|
| 1                 | 57R 1.4R 7.2R 95R 52F 26.1R<br>32.1F 94R   | 4,800,000                      | 101F 21.2F 67F 73F 105F 49.1R<br>58.1R 97R 89F 78F 24.1R 47.2R 100F |
| 2                 | 40R 23.2R 46.1R 5.1F 13R                   | 100,000                        | 77F 11.1R 54F 61F 53F 11.2F 1.1R<br>37R                             |
| 3                 | 30R 18R 34.2R 2.2F                         | 300,000                        | 0R 7.1R 34.1F 2.1R                                                  |
| 4                 | 16F 42R 99F 5.2F                           | 4,300,000                      | 4F 72F 60R 43R 59F                                                  |
| 5                 | 10F 27F 69R 24.2R 48R                      | 2,200,000                      | 25F 49.2F 26.2F 90F                                                 |
| 6                 | 85F 14F 32.2R 36F                          | 100,000                        | 22F 23.1F 46.2F 15.1F 51R 118F 50F<br>62R 74R                       |
| 7                 | 103R 45R 92R 15.2R 8.3R 28.1F<br>8.2F 8.1F | 3,600,000                      | 9F 80F 15.3F 106R 125R 87R 56R<br>144R 1.3F 7.3F 123F               |
| 8                 | 76R 79F 63F 19F                            | 2,500,000                      | 41R 3.1F 104F 21.1F 33F 83F                                         |
| 9                 | 81F 88F 71F 12.1F 31.1R 12.2R<br>31.2F     | 3,200,000                      | 115R 65.1R 44F 1.2R 84F 3.2F                                        |
| 10                | 20R 126R 65.2R 70F 75F 17F<br>86F          | 3,100,000                      | 6F 68R 39R 119R 64R 29R 91.2R                                       |

**S2.3 Telomeres.** The sorghum telomere signature sequence is (AAACCCT)<sub>N</sub>.

Chromosomes 1, 4, 5, 7, 10 show evidence of having both telomeres attached; chromosomes 2, 3, 6, 8, and 9 include only one telomere in the assembly.

| Chromosome | P telomere | Q telomere |
|------------|------------|------------|
| 1          | Yes        | Yes        |
| 2          | No         | Yes        |
| 3          | Yes        | No         |
| 4          | Yes        | Yes        |
| 5          | Yes        | Yes        |
| 6          | No         | Yes        |
| 7          | Yes        | Yes        |
| 8          | No         | Yes        |
| 9          | Yes        | No         |
| 10         | Yes        | Yes        |

## S2.4 Completeness of assembly

To assess the completeness of the *S. bicolor* assembly, we aligned 20,417 *S. bicolor* transcript assemblies from the TIGR PlantTA gene indices using BLAT<sup>16</sup> against the 16-mer-repeat-masked sequence. Only 911, or 4.4%, did not map to the genome assembly.

Of these, 756 have a hit to Uniprot90. Only 51 were shown to have any similarity to known plant sequences, with the remainder dominated by hits to fungal genes (related to the genus *Fusarium*) or other likely contaminants of available sorghum cDNA libraries.

|                                                                          |     |
|--------------------------------------------------------------------------|-----|
| No hits to UniProt                                                       | 155 |
| Fungal                                                                   | 517 |
| Lower eukaryote                                                          | 89  |
| Animal                                                                   | 76  |
| Plant                                                                    | 51  |
| Bacteria                                                                 | 15  |
| Algal                                                                    | 7   |
| Viral                                                                    | 1   |
| Total TIGR Sorghum transcript assemblies that do not hit genome assembly | 911 |

If we assume that the 51 hits to plant genes, 7 algal hits, and the 155 PlantTA's that don't hit UniProt90 together represent an overestimate of the missing protein-coding loci in the sorghum genome, then we have missed only at most ~1%.

## S2.5 Accuracy of the assembly in genic and repetitive regions

To evaluate the accuracy of the assembly on a local scale, 31 BAC clones were subcloned into ~3kb insert plasmid clones and end-sequenced using ABI3730 Sanger methods, and finished to Bermuda standards by primer walking and gap closure.

Comparison of the assembly to these randomly chosen BAC clones showed excellent coverage and sequence-level accuracy (Table S5). 98.46% of the bases were represented in the assembly exactly as they appeared in the clones. When we exclude gap-adjacent, AT string, and marked low quality sequence the error rate is lower than 1 in 10,000 bp. However, the area covered by the finished clones includes 4 assembly collapses on repetitive elements which account for 35,040 of the non-matching bps in the 3.3 Mb surveyed (~1%) and one finished clone deletion of 4,223 bps.

Nearly 2/3 of the “missing” region from clone 4002310 can be found scattered throughout the genome, and represents repetitive regions that were not accurately captured in the whole genome assembly.

Clones 4000659 and 4000660 were the same clone accidentally sequenced twice; the only difference in these finished clones is the length of an (AT)<sub>n</sub> microsatellite.

**Table S5. Comparison of the WGS assembly to randomly-chosen BAC clones.**

| PID         | SIZE    | START  | STOP    | DIR | CHR | START      | STOP       | IDENT   | MISS | ERROR | GAP   | EXTRA   | Accuracy |
|-------------|---------|--------|---------|-----|-----|------------|------------|---------|------|-------|-------|---------|----------|
| >4000658.2  | 127,914 | 0      | 127,914 | -   | 1   | 9,739,369  | 9,866,665  | 127,277 | 637  | 14    | 0     | 5       | 99.99    |
| >4002334.3  | 128,769 | 0      | 128,769 | -   | 1   | 12,137,156 | 12,265,625 | 128,156 | 613  | 8     | 603   | 82      | 99.76    |
| >4002335.2  | 120,503 | 0      | 120,503 | +   | 1   | 12,352,549 | 12,474,452 | 120,325 | 178  | 29    | 140   | 60      | 99.85    |
| >4002313.1  | 128,409 | 0      | 128,409 | -   | 1   | 12,447,249 | 12,575,655 | 128,406 | 3    | 0     | 0     | 0       | 100      |
| >4002299.4  | 136,055 | 0      | 136,055 | +   | 1   | 12,606,253 | 12,750,391 | 136,016 | 39   | 11    | 25    | 3       | 99.97    |
| >4000656.3  | 129,695 | 0      | 129,695 | +   | 1   | 16,983,689 | 17,113,180 | 129,132 | 563  | 9     | 341   | 9       | 99.72    |
| >4000657.3  | 117,931 | 0      | 117,931 | +   | 1   | 68,817,224 | 68,934,972 | 117,391 | 540  | 9     | 361   | 0       | 99.7     |
| >4002300.2  | 114,848 | 0      | 114,848 | +   | 3   | 46,423,819 | 46,534,299 | 110,327 | 4521 | 2     | 172   | 1       | 99.86    |
| >4002303.1  | 106,227 | 0      | 106,227 | +   | 3   | 46,498,351 | 46,604,427 | 105,498 | 729  | 26    | 291   | 202     | 99.46    |
| >4002310.2  | 121,989 | 0      | 121,989 | -   | 3   | 46,675,710 | 46,789,249 | 112,635 | 9354 | 8     | 405   | 299     | 99.2     |
| >4002316.4  | 100,445 | 0      | 100,445 | +   | 3   | 46,756,550 | 46,857,772 | 99,931  | 514  | 2     | 451   | 531     | 99.49    |
| >4002445.5  | 112,839 | 0      | 112,839 | -   | 3   | 61,149,622 | 61,267,708 | 111,929 | 910  | 94    | 640   | 4,223   | 99.19    |
| >4002446.3  | 96,424  | 0      | 96,424  | +   | 4   | 14,631,428 | 14,727,858 | 96,423  | 1    | 0     | 0     | 7       | 100      |
| >4002328.7  | 64,213  | 0      | 64,213  | +   | 4   | 14,731,102 | 14,795,300 | 64,194  | 19   | 4     | 0     | 0       | 99.99    |
| >4000662.5  | 108,555 | 0      | 108,555 | +   | 4   | 61,840,377 | 61,950,973 | 106,932 | 1623 | 125   | 1,386 | 16      | 98.5     |
| >4000659.1  | 105,241 | 0      | 105,241 | -   | 5   | 7,420,443  | 7,526,019  | 105,119 | 122  | 37    | 0     | 320     | 99.88    |
| >4000660.2  | 105,215 | 0      | 105,215 | +   | 5   | 7,420,443  | 7,526,019  | 105,119 | 96   | 37    | 0     | 320     | 99.91    |
| >4000653.5  | 138,518 | 0      | 138,518 | +   | 8   | 1,361,065  | 1,494,011  | 131,842 | 6676 | 38    | 990   | 5       | 99.17    |
| >4000655.3  | 135,209 | 0      | 135,209 | +   | 8   | 1,959,194  | 2,094,545  | 135,140 | 69   | 45    | 0     | 166     | 99.95    |
| >4000661.2  | 137,889 | 80,919 | 119,588 | +   | 8   | 43,520,874 | 44,268,271 | 38,190  | 479  | 450   | 0     | 664,829 | 98.76    |
| >4000663.5  | 122,145 | 37     | 122,145 | -   | 8   | 53,703,811 | 53,826,194 | 121,835 | 273  | 25    | 0     | 207     | 99.78    |
| >4002308.25 | 117,078 | 0      | 117,078 | -   | 8   | 53,886,081 | 54,002,976 | 116,754 | 324  | 30    | 152   | 11      | 99.88    |
| >4000664.11 | 70,712  | 0      | 70,712  | -   | 9   | 5,655,664  | 5,726,468  | 70,702  | 10   | 8     | 0     | 94      | 99.99    |
| >4002337.14 | 145,423 | 0      | 145,423 | -   | 9   | 20,978,313 | 21,117,184 | 138,793 | 6630 | 72    | 0     | 6       | 99.94    |
| >4002317.3  | 149,983 | 0      | 98,979  | -   | 9   | 21,035,950 | 21,396,759 | 98,830  | 149  | 130   | 0     | 261,849 | 99.85    |
| >4002305.2  | 115,915 | 0      | 115,915 | +   | 9   | 21,090,041 | 21,205,951 | 115,891 | 24   | 19    | 0     | 0       | 99.98    |
| >4002441.4  | 128,738 | 0      | 123,196 | +   | 9   | 21,183,013 | 21,298,372 | 115,337 | 7859 | 22    | 0     | 0       | 99.98    |
| >4002450.1  | 112,916 | 0      | 112,916 | -   | 9   | 21,430,150 | 21,543,374 | 112,916 | 0    | 0     | 0     | 208     | 100      |
| >4002336.3  | 105,211 | 0      | 105,211 | +   | 9   | 21,522,917 | 21,628,067 | 104,854 | 357  | 4     | 0     | 192     | 99.72    |
| >4002309.3  | 123,072 | 0      | 123,072 | -   | 9   | 21,662,660 | 21,788,680 | 123,047 | 25   | 23    | 0     | 1950    | 99.98    |
| >4002301.3  | 130,057 | 0      | 130,057 | +   | 9   | 21,788,674 | 21,918,332 | 127,851 | 2206 | 13    | 2190  | 4       | 98.61    |

**S2.6 Reconciliation of the assembly with genetic and physical maps, stress-testing based on synteny, and chromosome identification.**

The robustness of assembly of the 201 largest scaffolds (representing 678,902,941 bp or 97.3% of all nucleotides) was tested based on several independent lines of evidence.

Sequences from 2,050 genetically-mapped RFLP probes from a 2,512 locus map that defines 61.5% of the recombination events in the underlying population<sup>17</sup> were compared to the longest 201 scaffolds via BLAST (blastn  $E \leq 1E-6$ ), plotting the corresponding locations for the top three hits for each sequence on a representation of the scaffold (for example, see one scaffold in Figure S2). Multiple hits were plotted for each RFLP probe sequence because some probes map to multiple loci, and other probes that only map to single loci have additional copies that were not polymorphic in the mapping population.

A physical map consisting of 1,869 contigs assembled from an 11x coverage BAC library by BAC fingerprinting and overgo hybridization<sup>13</sup> was compared to the assembly by superimposing paired-end sequences from the physically mapped BACs onto the 201 sequence scaffolds. A dot was plotted for each BAC end corresponding to its contig in the physical map and its position in the scaffold assembly. BAC ends were plotted in black, green, or red, respectively, for physical contigs that had 3 or more BAC ends going to 1, 2, or 3 or more different sequence scaffolds. Of the 1,869 physical contigs, only 122, 18, and 6 corresponded to two, three, and four different sequence scaffolds, respectively. This agreement between the physical contigs and the independently constructed sequence assembly strongly supported that each data type accurately represented the sorghum DNA. Incongruities such as a physical map contig mapping to the center of two different sequence scaffolds indicated loci where either the physical map contig or the sequence scaffold was assembled incorrectly. Cases where the end of a sequence scaffold occurred in the middle of a physical map contig could be used as a hint as to which scaffold it should be assembled with (in combination with support by other evidence). A total of 37 of the 117 joins were made in this manner.

The next line of evidence was to plot the gene density (as represented by the best hit to sorghum ESTs); matches to two abundant retroelements *Candystripe1* (which corresponded strongly with gene rich regions -<sup>18</sup>), and *Retrosor6* which corresponded with gene poor heterochromatin<sup>11</sup>; or to *CEN38*, a centromeric repeat<sup>19</sup>. In general the chromosome ends tended to be rich in *Candystripe1* and ESTs, with interstitial levels gradually decreasing accompanied by progressively higher densities of *Retrosor6*, and finally with stretches of *CEN38* in the centromeric regions. The transitions from gene rich to gene poor was generally gradual -- abrupt transitions from very low densities of *Retrosor6* to very high densities provided further support of assembly errors that were already suspected due to other lines of evidence.

The rice genome was previously known to show good collinear synteny to sorghum with a limited number of macro-scale rearrangements<sup>20</sup>. Predicted rice genes (TIGR Version 4.0, excluding retrotransposon related genes) were plotted onto the sorghum scaffolds by BLAST (tblastx  $E \leq 1E-6$ ). The best and second-best hits of a rice gene were plotted as black and red dots, respectively. In many regions stretches of best hits corresponding to the orthologous and second best hits corresponding to paralogous regions were evident, due to ancient polyploidy<sup>20</sup>. Synteny was used as an additional test of the sequence assembly, as a scaffold would not be expected to show long stretches of rice-sorghum synteny if incorrectly assembled. It must be emphasized that synteny information was

only used to support other lines of evidence, and the assembly never exclusively relied on synteny to support any genome arrangement.

A total of 109 regions were not spanned by any BAC clones and 59 were not spanned by fosmid clones (44 lacked both BACs and fosmids). These regions, assembled exclusively from the smaller clone libraries, would be extremely sensitive to misassembly associated with duplicated or repetitive DNA, and were noted as further support of suspected assembly errors.

Collectively, these independent lines of evidence identified 28 assembly errors, in all cases relying on multiple lines of evidence. After breaking the scaffolds at the 28 points that appeared to be incorrect joins, the resulting 229 scaffolds and scaffold pieces were assembled into chromosomes where possible based on the physical map, genetic map, rice synteny and genome structure (as represented by the gene and repeat distribution), inferring joins based on at least two independent lines of evidence. Finally in the process of development of the genome assembly 3 previous automated assemblies had been made with incomplete sets of the sequence data. In many cases the different assemblies showed different breakpoints, with a region being assembled in one assembly differently from another.

In total 127 of the scaffolds could be assembled into chromosomes representing 625,636,247 bp or 89.7% of all basepairs. Based on cytological evidence<sup>14</sup> the resulting assemblies were oriented to place the shorter chromosome arm at the top. In total 117 joins could be inferred between adjacent scaffolds based on the multiple lines of evidence discussed above, orienting all 127 scaffolds and providing an initial representation of the 10 sorghum chromosomes. Different pieces of evidence were used for each join as listed in Table S6. In general no more than one join per chromosome lacked support from two or more types of evidence. All such unsupported joins were at the centromere, resulting in two largely complete chromosome arms that could be assigned and oriented by genetic markers. Several large scaffolds could not be assembled into the chromosomes, the 5 largest being 8.8, 7.2, 7.1, 4.6, and 3.6 mbp respectively. Most likely two of these large unanchored scaffolds belong to chromosome 1, the only one that was notably smaller than the size predicted by cytology.

The remaining 102 scaffolds tended to be much smaller and were predominantly centromeric, with 85 containing major stretches of the centromeric repeat CEN38<sup>19</sup>. Overall the chromosomes as assembled contain, respectively, approximately 0, 5.5, 4.5, 0.5, 2.6, 5.2, 1.2, 2.3, 1.6, and 1.7 mbp of centromeric repeats (based on the size of the region of dense Cen38 element abundance, with most Cen38 elements accounted for by these regions. This totaled 25.1 mbp of centromeric regions assembled into chromosomes. A total of 1362 unassembled sequence scaffolds (representing 34.94 mbp or 5% of all basepairs) are presumably centromeric based on the presence of Cen38 elements. Anchored and unanchored scaffolds together total about 60 MBP. However about 20% of this was gaps of "Ns" in the assembly, suggesting that the true total size of the centromeres is about 48 mbp. The centromeres of two chromosomes (2 and 6) are markedly larger than the average of 4.8 mbp, either due to false assembly or variation in centromere size. To account for missing centromeric DNA in chromosome assemblies,

gaps of Ns was incorporated into the assembly of each chromosome to bring the centromere size up to the average 4.8 mbp. For the 10 chromosomes, respectively, this added 4.8, 0.1, 0.3, 4.3, 2.2, 0.1, 3.6, 2.5, 3.2, and 3.1 mbp of Ns.

Alignment of the sorghum and rice sequence scaffolds, and the published maize physical map<sup>21</sup>, to the respective genetic maps, permitted a comparative analysis of genome size evolution.

**Figure S2 (next page after caption).** Example of WGS assembly verification on one scaffold, and assembly of scaffolds into chromosomes.

Scaffold-7 from the WGS assembly is shown. The far left scale shows the location on the scaffold in MBP. The left hand side of the figure shows synteny to rice genes with the horizontal axis representing the rice genes in order over the 12 rice chromosomes. A black dot represents the location of a best hit of a rice gene to the sorghum sequence assembly and a red dot represents the second best hit. Linear patterns of dots represent segments of synteny to this scaffold. The lines predominantly composed of black dots correspond to rice-sorghum orthologous segments, and the lines predominantly consisting of red dots represent homoeologous (or paralogous) synteny resulting from the “rho” paleopolyploidy event common to the grasses<sup>20</sup>. Scattered dots tend to correspond to single gene duplications and translocations that add noise to the general pattern of synteny. Horizontal lines in this section represent portions of the scaffold that were not spanned by large insert clones, with red horizontal lines not spanned by BACs and blue horizontal lines not spanned by fosmid clones. Such areas not spanned by large insert clones are prone to mis-assembly by Arachne2 in the automatically generated WGS scaffold, due to repeats that are too long to be disambiguated by shorter-insert clones, such as recently duplicated copies of ~10-kb Retrosor-6<sup>22</sup> or other retrotransposons that are nearly identical.

The middle section of the figure represents a reference genetic map of sorghum<sup>17</sup>. Each colored horizontal line in this section represents a marker on the genetic map. Line colors correspond to different sorghum chromosomes with color coding provided in a legend near the bottom of the figure, and the lengths of the lines corresponding to the genetic map position in centimorgans. Accordingly, different genetic markers that are closely linked on the genetic map would be expected to have lines of similar length. We note that since roughly 1/3 of the loci on the genetic map were from probes that mapped to multiple locations, some genetically mapped loci are paralogs and are expected to be inconsistent with the sequence assembly, as it is with rice synteny (Paterson et al 2004).

The next section represents the FPC based physical map of Sorghum<sup>13</sup>. In this case each dot represents a sequenced BAC end, with the horizontal position of the dots corresponding to the FPC contig number within the physical map. FPC contigs that had >4 BAC ends matching more than one sequence assembly scaffold are plotted with green dots while all others are plotted with black dots.

The far right portion of the figure shows distributions of Retrosor-6 repeats (green), Cen-38 repeats (red, not present in this scaffold), Candystripe-1 elements (light blue), sorghum ESTs (black) and sequence gaps in the scaffold (dark blue).



Scaffold-7 shows 3 abrupt changes in rice-sorghum synteny, corresponding to roughly 2 MBP, 4.4 MBP, and 10.2 MBP. The synteny breakpoints at 2 MBP and 10.2 MBP also correspond to regions of the scaffold not spanned by large insert clones (BACs, and fosmids and BACs respectively). The 2 MBP and 10.2 MBP synteny discontinuities also correspond to breakpoints in alignment to the sorghum genetic map, with the top portion of the scaffold corresponding to sorghum chromosome 3 above the 2 MBP breakpoint, to chromosome 1 after the first breakpoint, and finally to chromosome 7 after the 10.2 MBP breakpoint. Finally only 6 FPC contigs on this scaffold did not agree with the sequence scaffold assembly (in green), and of these 4 were clustered in pairs around the 2 MB and 10.2 Mb points not spanned by large insert clones –which are also synteny breakpoints. The synteny breakpoint around 4.5 MBP was not suggested by any other lines of evidence to be an error in the scaffold assembly, and was consistent with a previously-identified genomic rearrangement distinguishing rice and sorghum<sup>17</sup>.

The various lines of evidence shown in the figure were used to break the automatically assembled scaffold-7 into 3 parts at 2 MBP and 10.2 MBP. Similar figures were examined for the 201 largest scaffolds to verify scaffold assemblies. The same lines of evidence were then used to reassemble the scaffolds and scaffold parts into chromosomal assemblies.

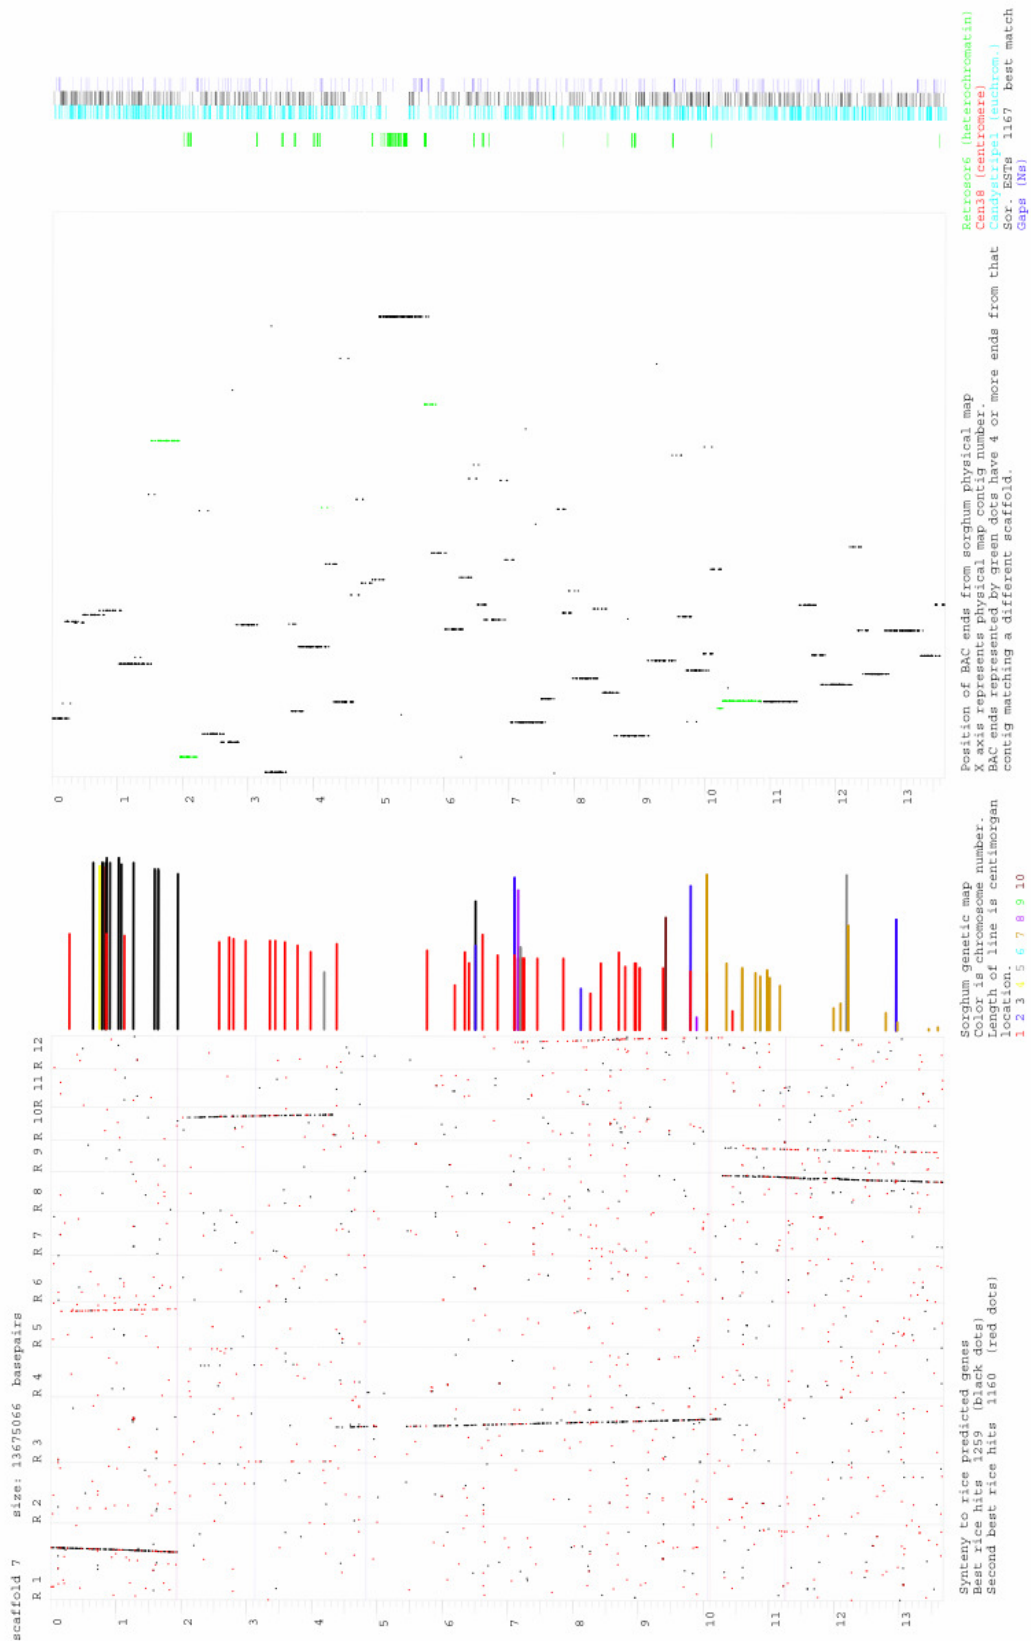

**Table S6:** Evidence for each scaffold join in chromosome assembly

| Sorghum chromosome | Scaffold numbers flanking inferred join | Affected contigs were joined in alternate (preliminary, or less stringent) sequence assemblies | Synteny to rice across gap | Genetic map shows close linkage between scaffolds | Gap is spanned by physical map contig | Note       |
|--------------------|-----------------------------------------|------------------------------------------------------------------------------------------------|----------------------------|---------------------------------------------------|---------------------------------------|------------|
| 1                  | 57R-1.4R                                | No                                                                                             | Strong                     | Yes                                               | No                                    | Telomere   |
| 1                  | 1.4R-7.2R                               | Yes                                                                                            | Strong                     | Yes                                               | Yes                                   |            |
| 1                  | 7.2R-95R                                | Yes                                                                                            | Strong                     | Yes                                               | Yes                                   |            |
| 1                  | 95R-52F                                 | No                                                                                             | Strong                     | Yes                                               | No                                    |            |
| 1                  | 52F-26.1R                               | Yes                                                                                            | Strong                     | No                                                | No                                    |            |
| 1                  | 26.1R-32.1F                             | No                                                                                             | Strong                     | No                                                | No                                    |            |
| 1                  | 32.1F-94R                               | Yes                                                                                            | Weak                       | No                                                | Yes                                   |            |
| 1                  | 94R-101F                                | No                                                                                             | Weak                       | No                                                | No                                    | Centromere |
| 1                  | 101F-21.2F                              | Yes                                                                                            | Weak                       | Yes                                               | Yes                                   |            |
| 1                  | 21.2F-67F                               | No                                                                                             | Weak                       | Yes                                               | No                                    |            |
| 1                  | 67F-73F                                 | No                                                                                             | Strong                     | Yes                                               | No                                    |            |
| 1                  | 73F-105F                                | No                                                                                             | Strong                     | No                                                | No                                    |            |
| 1                  | 105F-49.1R                              | Yes                                                                                            | Strong                     | No                                                | Yes                                   |            |
| 1                  | 49.1R-58.1R                             | Yes                                                                                            | Strong                     | Yes                                               | Yes                                   |            |
| 1                  | 58.1R-97R                               | No                                                                                             | Strong                     | Yes                                               | No                                    |            |
| 1                  | 97R-89F                                 | Yes                                                                                            | Strong                     | Yes                                               | No                                    |            |
| 1                  | 89F-78F                                 | Yes                                                                                            | Strong                     | Yes                                               | No                                    |            |
| 1                  | 78F-24.1R                               | Yes                                                                                            | Strong                     | No                                                | Yes                                   |            |
| 1                  | 24.1R-47.2R                             | Yes                                                                                            | Strong                     | No                                                | Yes                                   |            |
| 1                  | 47.2R-100F                              | Yes                                                                                            | Strong                     | Yes                                               | Yes                                   | Telomere   |
| 2                  | 37F-1.1F                                | No                                                                                             | Strong                     | Yes                                               | No                                    |            |
| 2                  | 1.1F-11.2R                              | Yes                                                                                            | Strong                     | Yes                                               | Yes                                   |            |
| 2                  | 11.2R-53R                               | Yes                                                                                            | Strong                     | Yes                                               | Yes                                   |            |
| 2                  | 53R-61R                                 | No                                                                                             | Weak                       | Yes                                               | No                                    |            |
| 2                  | 61R-54R                                 | Yes                                                                                            | Weak                       | Yes                                               | Yes                                   |            |
| 2                  | 54R-11.1F                               | Yes                                                                                            | Weak                       | No                                                | Yes                                   |            |
| 2                  | 11.1F-77R                               | Yes                                                                                            | Weak                       | No                                                | Yes                                   |            |
| 2                  | 77R-13F                                 | Yes                                                                                            | None                       | No                                                | No                                    | Centromere |
| 2                  | 13F-5.1R                                | Yes                                                                                            | Weak                       | Yes                                               | Yes                                   |            |
| 2                  | 5.1R-46.1F                              | No                                                                                             | Strong                     | Yes                                               | No                                    |            |
| 2                  | 46.1F-23.2F                             | Yes                                                                                            | Strong                     | Yes                                               | No                                    |            |
| 2                  | 23.2F-40F                               | Yes                                                                                            | Strong                     | Yes                                               | No                                    | Telomere   |
| 3                  | 30R-18R                                 | Yes                                                                                            | Strong                     | Yes                                               | No                                    | Telomere   |
| 3                  | 18R-34.2R                               | Yes                                                                                            | Strong                     | Yes                                               | No                                    |            |
| 3                  | 34.2R-2.2F                              | Yes                                                                                            | Weak                       | Yes                                               | Yes                                   |            |
| 3                  | 2.2F-0R                                 | No                                                                                             | Weak                       | Yes                                               | No                                    | Centromere |
| 3                  | 0R-7.1R                                 | Yes                                                                                            | Strong                     | Yes                                               | Yes                                   |            |

|   |             |     |        |     |     |            |
|---|-------------|-----|--------|-----|-----|------------|
| 3 | 7.1R-34.1F  | Yes | Strong | Yes | No  |            |
| 3 | 34.1F-2.1R  | Yes | Strong | Yes | Yes |            |
| 4 | 59R-43F     | No  | Strong | Yes | No  | Telomere   |
| 4 | 43F-60F     | No  | Strong | Yes | No  |            |
| 4 | 60F-72R     | No  | Strong | Yes | No  |            |
| 4 | 72R-4R      | Yes | Strong | Yes | No  |            |
| 4 | 4R-5.2R     | No  | None   | No  | No  | Centromere |
| 4 | 5.2R-99R    | Yes | Weak   | No  | Yes |            |
| 4 | 99R-42F     | No  | Weak   | No  | No  |            |
| 4 | 42F-16R     | Yes | Strong | Yes | No  | Telomere   |
| 5 | 10F-27F     | No  | Strong | Yes | No  | Telomere   |
| 5 | 27F-69R     | No  | Weak   | Yes | No  |            |
| 5 | 69R-24.2R   | Yes | Weak   | Yes | Yes |            |
| 5 | 24.2R-48R   | Yes | None   | No  | Yes |            |
| 5 | 48R-25F     | No  | None   | No  | No  | Centromere |
| 5 | 25F-49.2F   | Yes | Strong | Yes | Yes |            |
| 5 | 49.2F-26.2F | Yes | Strong | Yes | Yes |            |
| 5 | 26.2F-90F   | No  | Strong | Yes | No  | Telomere   |
| 6 | 74F-62F     | No  | Strong | Yes | No  |            |
| 6 | 62F-50R     | No  | Strong | Yes | No  |            |
| 6 | 50R-118R    | No  | Strong | Yes | No  |            |
| 6 | 118R-51F    | No  | Strong | Yes | No  |            |
| 6 | 51F-15.1R   | No  | Strong | Yes | No  |            |
| 6 | 15.1R-46.2R | No  | Weak   | Yes | No  |            |
| 6 | 46.2R-23.1R | Yes | Weak   | No  | Yes |            |
| 6 | 23.1R-22R   | No  | Weak   | No  | No  |            |
| 6 | 22R-36R     | Yes | None   | No  | No  | Centromere |
| 6 | 36R-32.2F   | Yes | Weak   | No  | Yes |            |
| 6 | 32.2F-14R   | No  | Weak   | No  | No  |            |
| 6 | 14R-85R     | No  | Strong | Yes | No  | Telomere   |
| 7 | 123R-7.3R   | Yes | Strong | Yes | No  | Telomere   |
| 7 | 7.3R-1.3R   | Yes | Strong | Yes | Yes |            |
| 7 | 1.3R-144F   | Yes | Strong | No  | Yes |            |
| 7 | 144F-56F    | No  | Strong | No  | No  |            |
| 7 | 56F-87F     | No  | Strong | Yes | No  |            |
| 7 | 87F-125F    | Yes | Strong | Yes | No  |            |
| 7 | 125F-106F   | Yes | Strong | No  | No  |            |
| 7 | 106F-15.3R  | No  | Strong | No  | No  |            |
| 7 | 15.3R-80R   | Yes | Strong | No  | Yes |            |
| 7 | 80R-9R      | No  | Weak   | No  | No  |            |
| 7 | 9R-8.1R     | No  | None   | No  | No  | Centromere |
| 7 | 8.1R-8.2R   | Yes | Weak   | Yes | Yes |            |
| 7 | 8.2R-28.1R  | Yes | Weak   | No  | Yes |            |
| 7 | 28.1R-8.3F  | Yes | Weak   | Yes | Yes |            |
| 7 | 8.3F-15.2F  | No  | Weak   | Yes | No  |            |
| 7 | 15.2F-92F   | Yes | Strong | Yes | Yes |            |

|    |             |     |        |     |     |            |
|----|-------------|-----|--------|-----|-----|------------|
| 7  | 92F-45F     | Yes | Strong | Yes | Yes |            |
| 7  | 45F-103F    | No  | Strong | Yes | No  | Telomere   |
| 8  | 83R-33R     | Yes | Strong | Yes | Yes |            |
| 8  | 33R-21.1R   | Yes | Weak   | Yes | Yes |            |
| 8  | 21.1R-104R  | No  | Weak   | Yes | No  |            |
| 8  | 104R-3.1R   | Yes | Weak   | Yes | Yes |            |
| 8  | 3.1R-41F    | Yes | Weak   | Yes | Yes |            |
| 8  | 41F-19R     | No  | Weak   | Yes | No  | Centromere |
| 8  | 19R-63R     | No  | Strong | Yes | No  |            |
| 8  | 63R-79R     | No  | Strong | Yes | No  |            |
| 8  | 79R-76F     | No  | Strong | Yes | No  | Telomere   |
| 9  | 3.2R-84R    | Yes | Strong | Yes | No  | Telomere   |
| 9  | 84R-1.2F    | Yes | Strong | Yes | Yes |            |
| 9  | 1.2F-44R    | Yes | Weak   | No  | Yes |            |
| 9  | 44R-65.1F   | Yes | Weak   | No  | Yes |            |
| 9  | 65.1F-31.2R | No  | Weak   | No  | No  | Centromere |
| 9  | 31.2R-12.2F | Yes | Weak   | No  | Yes |            |
| 9  | 12.2F-31.1F | Yes | Weak   | No  | Yes |            |
| 9  | 31.1F-12.1R | Yes | Weak   | Yes | Yes |            |
| 9  | 12.1R-71R   | No  | Strong | Yes | No  |            |
| 9  | 71R-88R     | Yes | Strong | Yes | No  |            |
| 9  | 88R-81R     | Yes | Strong | Yes | No  |            |
| 10 | 64F-119F    | No  | Strong | Yes | No  | Telomere   |
| 10 | 119F-39F    | No  | Strong | Yes | No  |            |
| 10 | 39F-68F     | Yes | Strong | Yes | No  |            |
| 10 | 68F-6R      | No  | Strong | Yes | No  |            |
| 10 | 6R-86R      | No  | Weak   | Yes | No  | Centromere |
| 10 | 86R-17R     | Yes | Weak   | Yes | Yes |            |
| 10 | 17R-75R     | No  | Weak   | Yes | No  |            |
| 10 | 75R-70R     | Yes | Strong | No  | No  |            |
| 10 | 70R-65.2F   | Yes | Strong | No  | Yes |            |
| 10 | 65.2F-126F  | Yes | Strong | Yes | Yes |            |
| 10 | 126F-20F    | Yes | Strong | Yes | Yes | Telomere   |

**Table S7: Genome size evolution and distribution of recombination in sorghum, rice, and maize.**

|                                                          | Rice          | Sorghum       | Maize            |
|----------------------------------------------------------|---------------|---------------|------------------|
| Genome size (mbp)                                        | 420           | 740           | 2160             |
| Repetitive DNA (mbp, % total)                            | 168 (40%)     | 460 (62%)     | 1770 (82%)       |
| Retroelements (mbp, %)                                   | 109 (26%)     | 400 (54%)     | 1706 (79%)       |
| Recombination-poor DNA (heterochromatin?) (mbp, %)       | 63 (15%)      | 460 (62%)     | 773 (36%)        |
| Recombination in recombination-poor DNA, cM (% of total) | 30 cM (2%)    | 34 cM (3%)    | 361 cM* (4.8%)   |
| Gene models in recombination-poor DNA                    | 1717          | 8477          | N. A.            |
| Recombinogenic DNA (euchromatin?) (mbp, %)               | 309 (73.6%)   | 252 (34.1%)   | 1380 (64.1%)     |
| Recombination in recombinogenic DNA, cM (% of total)     | 1497 cM (98%) | 1025 cM (97%) | 7047 cM* (95.2%) |

**S2.7 Organellar sequences.**

The *Sorghum bicolor* mitochondria and chloroplast have been previously sequenced and are in Genbank as accessions NC\_008360 and NC\_008602. Because of the very clean nuclear DNA preparation used here, we did not have enough organelle “contamination” in the shotgun data to recreate both organelles from the WGS set. We did, however, verify that the sequences are identical to those available in Genbank, except for 1 bp in the mitochondrial genome, which was brought to the attention of the owner of the Genbank record.

**Insertions of organellar DNA into the nuclear genome of *Sorghum bicolor***

For the analysis the assembled nuclear genome of Sorghum was compared against the Sorghum plastid genome (EF115542) and the sorghum mitochondrial genome (DQ984518) respectively.

BLASTN was carried out locally using standard settings. We identified all hits longer than 50 bp for further analysis.

#### Sorghum plastid DNA vs. Sorghum nuclear genome

1402 insertions derived from the plastid genome have been identified (Table S7).

**Table S8: Length and distribution of chloroplast DNA insertions on the Sorghum chromosomes.**

| <i>Chromosome</i> | <i>Amt. ptDNA (bp)</i> | <i>Number of ptDNA insertions</i> |
|-------------------|------------------------|-----------------------------------|
| 1                 | 33084                  | 217                               |
| 2                 | 30533                  | 183                               |
| 3                 | 69304                  | 241                               |
| 4                 | 25431                  | 154                               |
| 5                 | 15055                  | 77                                |
| 6                 | 14705                  | 106                               |
| 7                 | 13579                  | 88                                |
| 8                 | 19778                  | 117                               |
| 9                 | 13413                  | 103                               |
| 10                | 17132                  | 116                               |

A total of 1,337 insertions detected are shorter than 500bp, with 47 between 0.5 and 1 kb, 15 between 1 and 2 kb, and only 3 exceeding 2 kb with the largest being 2483 bp. As illustrated below, sequence identity between the organellar DNA and the nuclear insertion is greater for longer inserts.



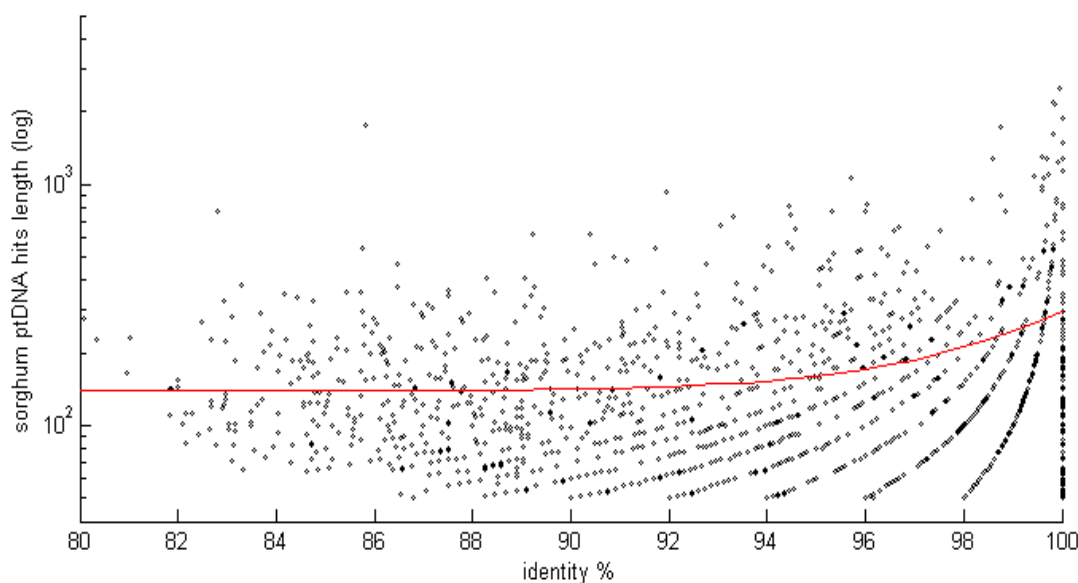

### Sorghum mtDNA vs. Sorghum nuclear DNA

A total of 2125 insertions derived from sorghum mtDNA have been detected. Similar to the findings for the chloroplast insertions, 2,052 are less than 500 nt in length, with 46 between 0.5 and 1 kb, 21 between 1 and 2 kb, 5 between 2 and 3 kb, and 1 exceeding 3 kb (3973 bp).

**Table S9: Length and distribution of mitochondrial DNA insertions on the Sorghum chromosomes.**

| <i>Chromosome</i> | <i>Amt. mtDNA (bp)</i> | <i>No. mtDNA insertions</i> |
|-------------------|------------------------|-----------------------------|
| 1                 | 37777                  | 350                         |
| 2                 | 43423                  | 239                         |
| 3                 | 59613                  | 281                         |
| 4                 | 31144                  | 206                         |
| 5                 | 19005                  | 157                         |
| 6                 | 20341                  | 200                         |
| 7                 | 19918                  | 159                         |
| 8                 | 21315                  | 151                         |
| 9                 | 27313                  | 165                         |
| 10                | 23852                  | 217                         |

Similar to observations for insertions derived from chloroplasts mitochondrial insertions show a pronounced correlation between insertions length and sequence conservation which illustrates an existing elimination mechanism.

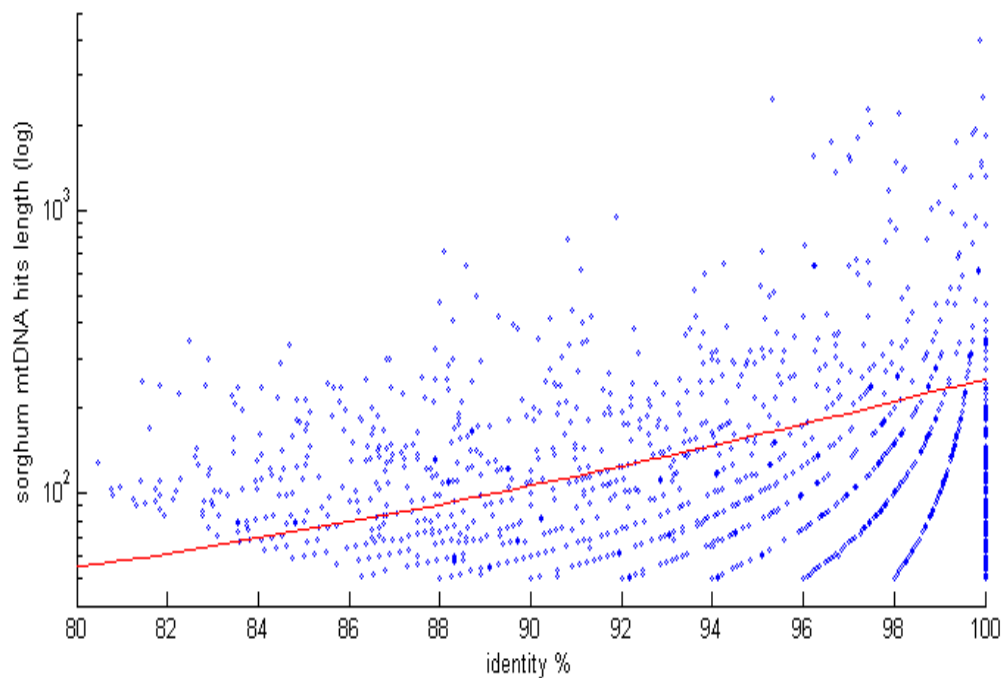

## S2.8 CpG Island Detection.

The EMBOSS (<http://emboss.sourceforge.net/>) program, *newcpgreport*, was used to call CpG islands with these parameters: CG observed/expected ratio ( $CG_{o/e}$ ) > 1.2; %[C+G] > 50.00; Length > 200; window size = 100. The actual  $CG_{o/e}$  in the sorghum genome is 0.691 assuming an expected CG frequency of 0.125%. EMBOSS output was parsed with in-house Perl scripts.

## S3. Repeat identification and characterization

Known repeats were identified with RepeatMasker ([www.repeatmasker.org](http://www.repeatmasker.org)) with a database of grass repeats (mips-REdat\_6.2\_Poaceae.lib) that contains previously known sorghum-specific LTR retrotransposons and those newly identified from the genome assembly as described below in S3.1. A summary of the repetitive DNA content can be found in Table S10.

### S3.1 Identification of LTR-retrotransposons

*De novo* searches for LTR retrotransposons were performed with LTR\_STRUCT ([pmid 12584121](https://pubmed.ncbi.nlm.nih.gov/12584121/)) on the 10 sorghum chromosomes and all unassembled contigs > 10 kb. The program yielded 10,126 full-length LTR retrotransposon candidate sequences, which were checked for the typical retrotransposon protein domains (GAG, PR, INT, RT) by a

HMMer (<http://hmmer.janelia.org>) search against respective pfam hmm models. 8071 (80%) of the candidate sequences remained after a quality check and overlap removal. The main quality criteria are the existence of at least one typical retrotransposon protein domain and a simple sequence and tandem repeat content  $\leq 35\%$ . According to their protein signatures 2985 (37 %) could be assigned to the gypsy (PR-RT-INT) and 724 (9%) to the copia (PR-INT-RT) LTR superfamily, the remaining 4362 (54%) are temporarily unclassified until the evaluation of further cluster analyses. A nonredundant set of 7643 quality checked LTR retrotransposons was added to mipsREdat ([mips.gsf.de/proj/plant/webapp/recat/](http://mips.gsf.de/proj/plant/webapp/recat/)), a plant repeat element database, used for the homology based repeat masking and annotation (S3.6).

The insertion age of full length LTR-retrotransposons was determined from the evolutionary distance between 5' and 3' soloLTR derived from a ClustalW alignment of the two solo LTRs by the Kimura two-parameter method (emboss distmat, <http://emboss.sourceforge.net/>). For the conversion of distance to insertion age, a substitution rate of  $1.3E-8$  mutations per site per year was used (pmid 15240870). An additional 4,192 full length LTRs were detected by the similarity search (S3.6), thus adding up to 11,352 full length sorghum LTRs on the assembled sorghum chromosomes, for which the insertion age could be calculated (Fig. S2).

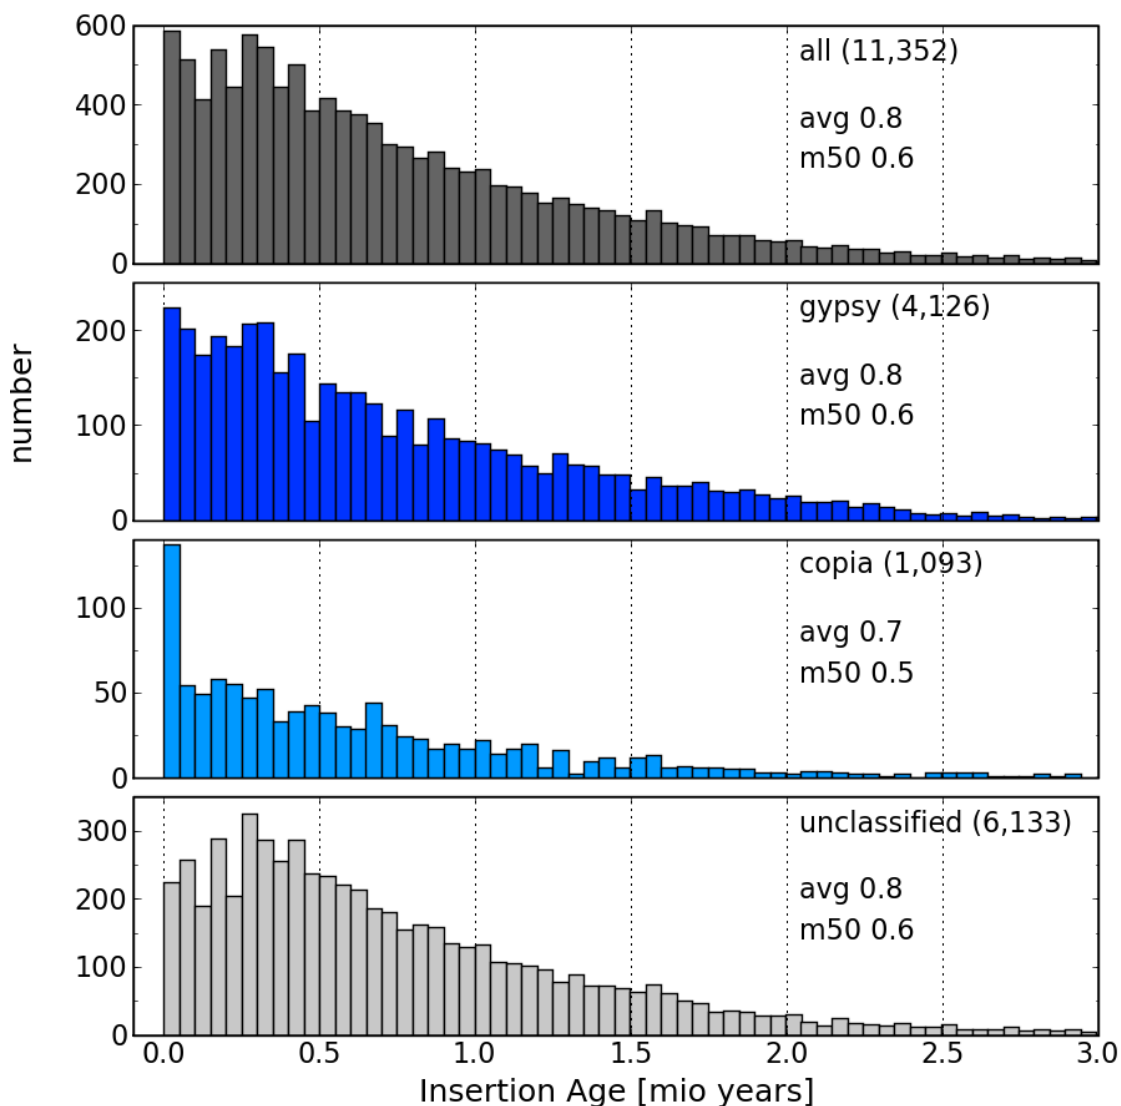

**Figure S3: Timing of LTR-Retrotransposon Insertions.** The insertion age of full length LTR-retrotransposons was determined from the divergence of left and right solo LTR as described (S 3.1). The bars represent bins of 0.05 million years (mya). The more or less constant increase starting about 5 mya is the outcome of two opposite forces: 1. element insertion and 2. removal and deterioration. Copia elements, which amount only to  $\frac{1}{4}$  of the copy numbers of gypsy-type elements show a very recent exceptional number increase.

### S3.2 MITEs

Full-length Miniature Inverted-repeat Transposable Elements (MITEs) were identified based on their inverted repeat structure and their 2 and 3 bp target site duplications for *Stowaway* and *Tourist* MITEs, respectively. The initial set identified in this way was used for multiple sequence alignments in order to identify families and to construct consensus sequences for all of them. The consensus sequences were used for a BLAST survey to identify all elements, including fragments.

### S3.3 Masking based on over-represented 16-mers

We also performed an *ab initio* search for repetitive elements as follows. The shotgun reads were scanned for 16-mers that occurred in the dataset more than 100 times. At 8.5X nominal coverage, such sequences are ~12-fold overrepresented relative to a naïve expectation from a non-repetitive genome, and include both simple sequence repeats (microsatellites) as well as other highly represented sequences (e.g., 16-bp fragments of minisatellites, retroelements, etc.) Note that many particular instances of a repetitive element in the genome have short stretches that are unique in the genome (e.g., due to mutations after retroelement insertion); in part, this variation between repeats allows assemblies of repetitive regions to be made. To represent repetitive regions, we first grouped blocks of overlapping over-represented 16-mers if they spanned more than 100 bp, and then grouped these blocks if the gaps between them were shorter than 140 bp, a spacing that was empirically determined.

There is good agreement between the over-represented 16-mer masking and masking based on known repeats, and for gene predictions we use the masking from known repeats as being more precise and less prone to masking recently expanded protein-coding gene families.

**Table S10:** Repeat composition and major components of the sorghum genome in comparison to rice and maize

|                                              | Os             | Sb            | Zm            |
|----------------------------------------------|----------------|---------------|---------------|
|                                              | % of genome bp |               |               |
| <b>Class I: Retroelement</b>                 | <b>25.78</b>   | <b>54.52</b>  | <b>79.44</b>  |
| <b>LTR Retrotransposon</b>                   | <b>23.47</b>   | <b>54.43*</b> | <b>75.08*</b> |
| Ty1/copia                                    | 2.47           | 5.18          | 21.75         |
| Ty3/gypsy                                    | 12.03          | 19.00         | 37.73         |
| unclassified LTR                             | 8.98           | 30.25         | 15.59         |
| <b>non-LTR Retrotransposon</b>               | <b>1.24</b>    | <b>0.04</b>   | <b>0.35</b>   |
| LINE                                         | 0.80           | 0.04          | 0.34          |
| SINE                                         | 0.45           | 0.00          | 0.01          |
| unclassified retroelement                    | 1.07           | 0.05          | 4.02          |
| <b>Class II: DNA Transposon</b>              | <b>13.67</b>   | <b>7.46</b>   | <b>2.68</b>   |
| <b>DNA Transposon Superfamily</b>            | <b>7.04</b>    | <b>4.79</b>   | <b>0.92</b>   |
| CACTA superfamily                            | 3.43           | 4.69*         | 0.47          |
| hAT superfamily                              | 0.52           | 0.02          | 0.10          |
| Mutator superfamily                          | 1.81           | 0.06          | 0.15          |
| Tc1/Mariner superfamily                      | 0.02           | 0.00          | 0.00          |
| PIF/Harbinger                                | 0.00           | 0.02          | 0.08          |
| unclassified                                 | 1.26           | 0.00          | 0.12          |
| <b>MITE</b>                                  | <b>5.24</b>    | <b>1.74*</b>  | <b>0.32</b>   |
| Stowaway                                     | 1.74           | 0.19          | 0.03          |
| Tourist                                      | 1.50           | 0.94          | 0.08          |
| unclassified MITE                            | 2.00           | 0.61          | 0.21          |
| <b>Helitron</b>                              | <b>0.33</b>    | <b>0.81*</b>  | <b>1.31*</b>  |
| unclassified DNA transposon                  | 1.06           | 0.12          | 0.12          |
|                                              |                |               |               |
| <b>Transposon DNA</b>                        | <b>39.5</b>    | <b>62.0</b>   | <b>82.1</b>   |
| <b>Coding space</b>                          | <b>33.0</b>    | <b>14.3</b>   | <b>7.5</b>    |
| <b>Unassigned space incl. regulatory seq</b> | <b>27.6</b>    | <b>23.7</b>   | <b>10.4</b>   |

The transposon space of sorghum (Sb), maize (Zm; 100 random BACs {pmid 16339807}) and rice (Os; TIGR 5 assembly) was annotated as described in section 3.6. Asterisks (\*) mark element types for which an additional *de novo* detection was carried out to complement the homology based approach.

Table S11: Repeat composition by type

|                             | Os      |        |                    | Sb      |        |                    | Zm*   |        |                    |
|-----------------------------|---------|--------|--------------------|---------|--------|--------------------|-------|--------|--------------------|
|                             | #       | # %    | % of transposon bp | #       | # %    | % of transposon bp | #     | # %    | % of transposon bp |
| Mobile Element              | 288,637 | 100.00 | 100.00             | 293,402 | 100.00 | 100.00             | 5,957 | 100.00 | 100.00             |
| Class I: Retroelement       | 122,900 | 42.58  | 65.35              | 216,519 | 73.80  | 87.96              | 5,333 | 89.52  | 96.74              |
| LTR Retrotransposon         | 104,088 | 36.06  | 59.49              | 214,800 | 73.21  | 87.81              | 4,925 | 82.68  | 91.42              |
| Ty1/copia                   | 11,158  | 3.87   | 6.25               | 19,844  | 6.76   | 8.36               | 1,172 | 19.67  | 26.48              |
| Ty3/gypsy                   | 26,253  | 9.10   | 30.49              | 38,652  | 13.17  | 30.66              | 1,790 | 30.05  | 45.95              |
| unclassified LTR            | 66,677  | 23.10  | 22.76              | 156,304 | 53.27  | 48.79              | 1,963 | 32.95  | 18.98              |
| non-LTR Retrotransposon     | 15,200  | 5.27   | 3.15               | 513     | 0.17   | 0.06               | 73    | 1.23   | 0.42               |
| LINE                        | 5,022   | 1.74   | 2.02               | 513     | 0.17   | 0.06               | 66    | 1.11   | 0.41               |
| SINE                        | 10,178  | 3.53   | 1.13               | 0       | 0.00   | 0.00               | 7     | 0.12   | 0.01               |
| unclassified retroelement   | 3,612   | 1.25   | 2.70               | 1,206   | 0.41   | 0.09               | 335   | 5.62   | 4.90               |
| Class II: DNA Transposon    | 185,737 | 57.42  | 34.65              | 76,883  | 26.20  | 12.04              | 624   | 10.48  | 3.26               |
| DNA Transposon Superfamily  | 49,315  | 17.09  | 17.83              | 16,220  | 5.53   | 7.72               | 272   | 4.79   | 1.12               |
| CACTA superfamily           | 11,245  | 3.90   | 8.68               | 15,006  | 5.11   | 7.56               | 94    | 1.58   | 0.47               |
| hAT superfamily             | 6,610   | 2.29   | 1.33               | 296     | 0.10   | 0.03               | 54    | 0.91   | 0.12               |
| Mutator superfamily         | 14,026  | 4.86   | 4.58               | 440     | 0.15   | 0.10               | 50    | 0.84   | 0.18               |
| Tc1/Mariner superfamily     | 182     | 0.07   | 0.05               | 22      | 0.01   | 0.00               | 1     | 0.02   | 0.00               |
| PIF/Harbinger               | 61      | 0.02   | 0.01               | 389     | 0.13   | 0.03               | 28    | 0.47   | 0.09               |
| unclassified                | 17,181  | 5.95   | 3.18               | 67      | 0.02   | 0.00               | 45    | 0.76   | 0.15               |
| MITE                        | 94,876  | 32.87  | 13.29              | 56,209  | 19.16  | 2.81               | 307   | 5.15   | 0.40               |
| Stow away                   | 33,571  | 11.63  | 4.41               | 7,191   | 2.45   | 0.31               | 28    | 0.47   | 0.04               |
| Tourist                     | 23,918  | 8.29   | 3.81               | 27,724  | 9.45   | 1.52               | 73    | 1.23   | 0.10               |
| unclassified MITE           | 37,386  | 12.95  | 5.07               | 21,294  | 7.26   | 0.98               | 206   | 3.46   | 0.26               |
| Helitron                    | 3,037   | 1.05   | 0.83               | 1,017   | 0.35   | 1.31               | 18    | 0.30   | 1.31               |
| unclassified DNA transposon | 18,509  | 6.41   | 2.70               | 3,437   | 1.17   | 0.20               | 27    | 0.45   | 0.15               |

\* 100 random BACs (14.4 Mb)

**Table S12. Repetitive content per chromosome**

| Chromosome                       | Total length<br>(including<br>spanned<br>gaps and<br>centromere)<br>[Mb] | Percent<br>G+C | Percent<br>A+T | Repeat-<br>masked<br>sequence (not<br>including<br>unassembled<br>regions)[%] | Percent<br>masked<br>sequence<br>based on<br>regions<br>dominated<br>by over-<br>represented<br>16-mers | Gaps in<br>sequence<br>assembly<br>(including<br>centromere)<br>[%] |
|----------------------------------|--------------------------------------------------------------------------|----------------|----------------|-------------------------------------------------------------------------------|---------------------------------------------------------------------------------------------------------|---------------------------------------------------------------------|
| 1                                | 73.8                                                                     | 44.9           | 55.1           | 44.6                                                                          | 40.2                                                                                                    | 0.8                                                                 |
| 2                                | 77.9                                                                     | 44.6           | 55.4           | 61.6                                                                          | 54.7                                                                                                    | 1.3                                                                 |
| 3                                | 74.4                                                                     | 44.9           | 55.1           | 59.3                                                                          | 53.4                                                                                                    | 0.9                                                                 |
| 4                                | 68.0                                                                     | 44.7           | 55.3           | 57.3                                                                          | 51.1                                                                                                    | 0.4                                                                 |
| 5                                | 62.4                                                                     | 43.5           | 56.5           | 66.0                                                                          | 57.9                                                                                                    | 0.8                                                                 |
| 6                                | 62.2                                                                     | 44.8           | 55.2           | 67.4                                                                          | 61.1                                                                                                    | 0.6                                                                 |
| 7                                | 64.3                                                                     | 44.1           | 55.9           | 67.4                                                                          | 60.1                                                                                                    | 0.7                                                                 |
| 8                                | 55.5                                                                     | 43.5           | 56.5           | 66.1                                                                          | 58.5                                                                                                    | 1.7                                                                 |
| 9                                | 59.6                                                                     | 44.4           | 55.6           | 63.0                                                                          | 56.4                                                                                                    | 1.1                                                                 |
| 10                               | 61.0                                                                     | 44.5           | 55.5           | 61.6                                                                          | 55.2                                                                                                    | 0.5                                                                 |
| <b>Total mapped<br/>sequence</b> | <b>659.2</b>                                                             | <b>44.4</b>    | <b>55.6</b>    | <b>61.4</b>                                                                   | <b>54.5</b>                                                                                             |                                                                     |
| <b>Unmapped<br/>sequence</b>     |                                                                          |                |                |                                                                               | <b>81.2</b>                                                                                             |                                                                     |



### S3.4 CACTA Search Strategy

A program was developed (T. Wicker) that specifically searches for the typical CACTA TIR pattern. Most CACTA elements have arrays of direct and inverted repeat units (about 20-40 bp per unit) in their terminal regions. They can be nicely visualised with a DotPlot of a CACTA sequence against itself (Figure S4).

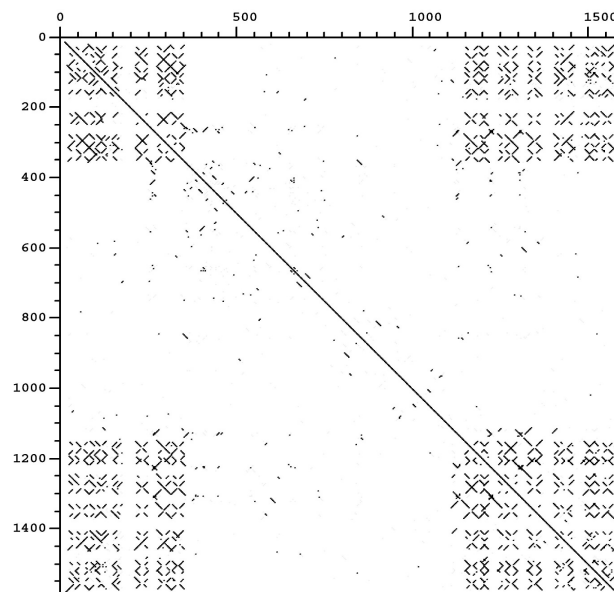

**Figure S4. Dotplot of a small non-autonomous CACTA element sequence compared with itself.** The terminal repeat arrays cause a characteristic pattern. This non-autonomous element is a deletion derivative that has lost all of its coding regions.

#### Search step 1

The program specifically searches for strings (5-7 bp) which occur in forward and reverse orientation within a region of ~500 bp. If that is found, it searches for a second region 1 – 12 kb away from it. If that is found, it looks if the element is flanked by the characteristic palindromic CACTA/G...C/TAGTG termini flanked by a 3 bp TSD.

#### Search Step 2

Since this pattern occurs more than 8,000 times in the sorghum genome, a second more stringent step was added to exclude chance occurrences. Using the Smith-Waterman algorithm, the 2 termini of each candidate were aligned and checked for the presence of imperfect terminal inverted repeats of at least 10 bp in size. This resulted in several hundred complete elements. From these, all known elements were identified by BLAST against the known CACTA elements.

The novel elements were BLASTed against one another to identify families. False positives that were still the product of chance occurrence were then selected out by hand. The result is 95 new CACTA families. Most of them have a moderate copy number. To date, only complete elements have been described.

Among 13,775 CACTA elements identified, 200 encode no transposon proteins but contain at least one cellular gene fragment. The actual number of CACTA-vectored gene fragments might be higher because many CACTA elements are truncated, making it difficult to determine whether nearby genes were vectored or native.

### S3.5 Helitron annotation

We calibrated the helitron finder of Du et al<sup>23</sup> based on helitrons predicted in a 1MB alignment between *S. bicolor* and *S. propinquum* and applied it to the whole genome. Estimates of helitron content in maize were made using the appropriate maize calibrations.<sup>23</sup>

**Table S13: Helitrons in sorghum and maize**

|                       | Sorghum     |             |          | Maize       |                        |
|-----------------------|-------------|-------------|----------|-------------|------------------------|
|                       | all         | chromosomes | unmapped | 100 BACs    | 2 contiguous sequences |
| Genomic sequence [Mb] | 738.5       | 659.2       | 79.3     | 14.4        | 14.4                   |
| # helitrons           | 1355        | 1017        | 338      | 22          | 29                     |
| sum of helitrons [Mb] | <b>7.2</b>  | 5.0         | 2.1      | 0.19        | 0.25                   |
| average length [kb]   | <b>5.3</b>  | 5.0         | 6.3      | 8.6         | 8.8                    |
| median length [kb]    | <b>3.6</b>  | 3.4         | 4.0      | 6.9         | 6.6                    |
| % in genome           | <b>0.97</b> | 0.77        | 2.68     | <b>1.31</b> | <b>1.76</b>            |

### S3.6 Tandem repeats

Tandem Repeats were detected by the program Tandem repeats finder ([tandem.bu.edu/trf/trf.html](http://tandem.bu.edu/trf/trf.html)) {pmid 9862982} with default parameters (2,7,7,80,10,50,500). Depending on monomer length the tandem repeats were classified as microsatellites (2-6 bp), minisatellites (7-100 bp) or satellites (> 100 bp). Overlaps were removed by collapsing all trf annotations on the genomic sequence. The tandem repeat content is summarized in Table S15. A list of SSR and VNTR loci potentially useful as DNA markers is provided in Supplementary List 1.

**Table S14: Tandem repeats**

|                | #       | # % | % of tandem repeat bp | perc of genom |
|----------------|---------|-----|-----------------------|---------------|
| Tandem Repeats | 109,039 | 100 | 100.0                 | 3.13          |
| Microsatellite | 15,194  | 14  | 4.4                   | 0.14          |
| Minisatellite  | 80,932  | 74  | 31.8                  | 1.00          |
| Satellite      | 12,913  | 12  | 63.8                  | 2.00          |
| Cen 38         | 4,229   | 4   | 46.9                  | 1.47          |

### S3.7 Repeat annotation and data integration

Diverged transposons and their fragments were detected with RepeatMasker Open-3-1-8 {[www.repeatmasker.org](http://www.repeatmasker.org)} using a customized grass repeat library (mips-REdat\_6.2\_Poaceae, 15665 sequences, 98.9 Mb) which contained the newly identified sorghum LTR-retrotransposons (S3.1) and MITEs (S3.2) in addition to a non redundant set of known grass transposons from the following sources: TREP ([wheat.pw.usda.gov/ITMI/Repeats/](http://wheat.pw.usda.gov/ITMI/Repeats/)), RetrOryza ([www.retroryza.org](http://www.retroryza.org)) {pmid 17071960}, TIGR plant repeats databases ([www.tigr.org/tdb/e2k1/plant.repeats/](http://www.tigr.org/tdb/e2k1/plant.repeats/)) {pmid 14681434} and RepBase ([www.girinst.org](http://www.girinst.org)) {pmid 16093699}.

The integration of the specialized transposon data for LTRs (S3.1), MITEs (S3.2), CACTAs (S3.3) and Helitrons (S3.4) into a final consolidated repeat annotation was carried out with modules from the MIPS ANGELA pipeline (Automated Nested Genetic Element Annotation). Overlapping repeat annotations frequently occur in repeat rich genomes. They are caused by highly similar regions shared by different transposons or by composite elements in the repeat libraries, e.g. LTR retrotransposons with CACTA inserts. The annotation overlaps were handled in a priority based approach. High confidence expert annotations are assigned first, and overlapping elements with lower priority are either truncated, fragmented or skipped, depending on adjustable parameters for overlap percent and minimum rest length. The assignment order within

one priority group is defined by descending homology score or element length. For sorghum all elements overlapping > 80% of their length to higher priority elements were discarded, the minimum rest length after truncation was 30 bp, and the following priority order was used: 1. CACTA DNA transposons; 2. MITES; 3. full length LTR retrotransposons; 4. RepeatMasker annotation. A summary of the repetitive content can be found in Table S10, together with a comparison to rice and maize.

The distribution of elements along the chromosomes was calculated from a sliding window of 0.5 Mb with 0.1 Mb overlaps (**Figure S5**). For each window the percent bp coverage of the respective element type was calculated with the number of non-N basepairs as denominator. Windows with > 60% N bp were not used and are depicted in white.

### **Figure S5: Genomic landscape of sorghum.**

The stacked barcharts along each chromosome show the proportional distributions of the main DNA element types: retrotransposons, genes split into exons and introns, DNA transposons and the cen38 centromeric tandem repeat. The gray color represents the so far unassigned space and includes regulatory regions. The observation that introns often contain transposons is not displayed in the barcharts, because of its absolute small value of ~1.5% of the genome content. The y-axis goes from 0 to 100 %bp, and the x-axis consists of 0.5 Mb sliding windows with a 0.1 Mb shift. Heatmap tracks visualize the distribution of specific elements (or families) and their correlations. The scale is different for each track, ranging from 0 (blue color) and to the maximum observed number (red color) given in the accompanying tables under the range field. The overall distribution pattern is similar for all chromosomes: cen38 makes up ~ 50% of the centromeric regions, which are thought to have been largely sequenced for chrs. 2, 3 and 6. The high retrotransposon content in the pericentromeric regions gradually decreases towards the gene rich chromosome ends. Gene and retrotransposon densities are negatively correlated, but DNA transposons (especially MITES) co-occur with genes. The short arm of chr. 6 is an exception, largely missing the gene rich region, with no paralogs and a relatively high retrotransposon content, giving the impression of a truncation. Such a truncation would necessarily have been ancient, as the corresponding rice chromosome shows similar gene and repeat distribution.

A high-resolution version of the figures below is also included as **Supplementary Image 1**, that permits zooming in on a specific region of interest.

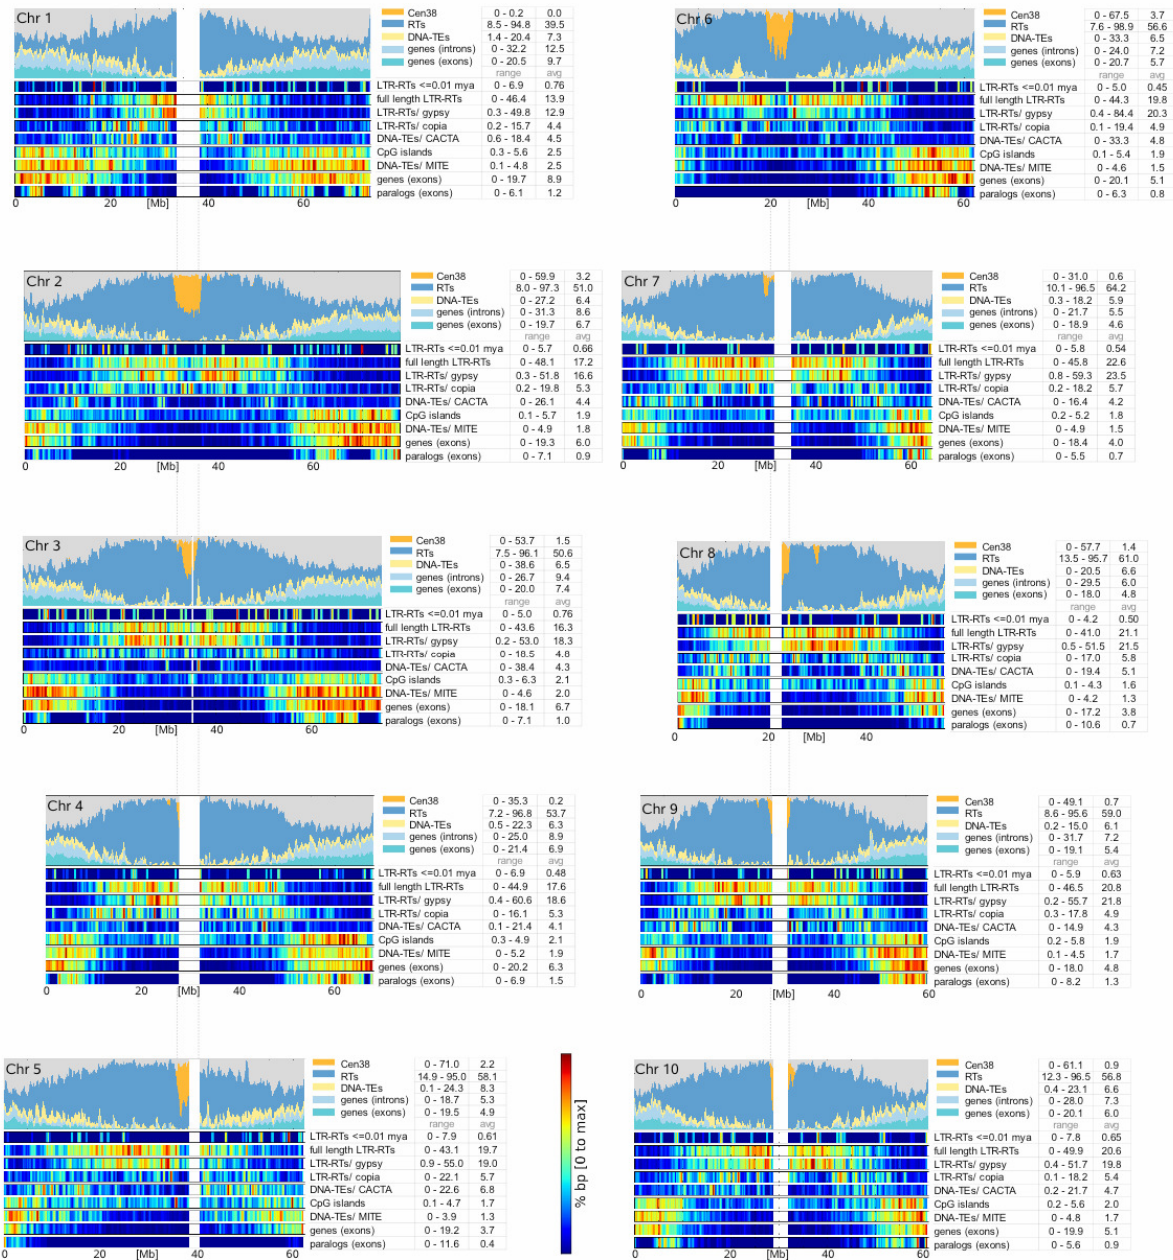



## S4. Protein coding gene annotation

### S4.1 Structural gene calls in the Sorghum genome

Protein-coding genes were derived from the consensus of several sources of evidences as well as *ab initio* predictions. First, TIGR rice transcript assemblies<sup>24</sup> were mapped to the repeat-masked Sorghum genome sequences applying GenomeThreader<sup>25</sup> and a maize splice site model. Optimal spliced alignments (OSAs) of assemblies and ESTs of the following monocot species have been included: *Allium cepa*, *Ananas comosus*, *Avena sativa*, *Brachypodium distachyon*, *Curcuma longa*, *Hordeum vulgare*, *Oryza sativa*, *Saccharum officinarum*, *Secale cereale*, *Sorghum bicolor*, *Sorghum halepense*, *Sorghum propinquum*, *Triticum aestivum*, *Zea mays*, and *Zingiber officinale*.

We also generated OSAs as well as BlastX alignments for a reference set of proteins consisting of the SWISSPROT database<sup>26</sup> and proteomes of *Arabidopsis thaliana* (TAIR6 version;<sup>27</sup>), *Saccharomyces cerevisiae*<sup>28</sup> and rice<sup>29</sup>. For each OSA, possible reading frames of size  $\geq 50$  amino acids were collected as candidates for gene models. In addition, we identified gene models on repeat masked genomic sequences by *ab initio* methods (Fgenesh++, GeneID, GenomeScan).

Next, we applied Jigsaw<sup>30</sup> as statistical combiner of all supporting information from the first analysis round described above. A decision tree has been trained on a set of 987 gene models that were edited by human supervision in the Apollo Genome Browser<sup>31</sup>. All models, including those obtained from the first analysis series, were scored by Blastp against the UniREF90 protein database and for each locus the best fitting model, i.e. the model with the highest bit score, has been selected.

The models were used as input for the PASA pipeline<sup>32</sup> in order to (i) predict UTRs using maize, sorghum and sugarcane ESTs, (ii) identify possible alternative splicing patterns, and (iii) to fit all predicted models to the splice sites suggested by EST evidences of closely related species. Besides complete gene models, we also included candidate (partial) genes that lack a start and/or stop codon. Note that partial gene models may result from several, not mutually exclusive reasons: (i) sequencing or assembly errors may hinder both *ab initio* and homology based predictors to deduce a correct ORF; (ii) transposon activity may have lead to truncated genes or pseudogenes; (iii) insufficient evidence from *ab initio* predictions or EST matches may build and support only incomplete gene models.

### S4.2 Gene identifiers

We adopted a gene nomenclature convention based on the time-tested approaches used by the Arabidopsis and rice communities (Eva Huala, TAIR, private communication). Each protein-coding gene locus is assigned a unique identifier of the form “SbXX%YYYYY” where

- “Sb” indicates *Sorghum bicolor*.
- “XX” is a two digit numerical chromosome identifier (01-10) or four digit scaffold identifier (0010-3326)

- The delimiter “%” is either “g” for chromosomally mapped sequences or “s” for scaffolds
- YYYYY is a unique five digit numerical code.

In the initial assignment of locus identifiers, genes are assigned numbers starting from YYYYY=00200 at the start of each assembled sequence, and incrementing by 10. Spans longer than 100 kb between initially annotated loci are represented by a skip of 200. Thus in the initial assignment, the numerical code corresponds to chromosomal position.

As additional data is generated, the initial chromosomal assembly of *Sorghum bicolor* described here is likely to accumulate small improvements that may result in (1) local rearrangements of modest numbers of genes, including gene model fusions and fissions, (2), placement onto chromosomes of currently unmapped protein-coding genes found in the scaffolds (most if not all of which are centromeric), (3) corrections will be made to predicted gene structures, and (4) new genes will be discovered.

In future releases, the following conventions will be used:

- Revisions and alternate splice isoforms of the protein-coding transcripts at a given locus SbXX%YYYYY will be assigned decimals as in SbXX%YYYYY.1, .2., .3., etc.
- Locus identifiers will be preserved if gene structure corrections are made, as long as the mapping from old to new is unambiguous.
- If a locus is deemed to have inadvertently joined two (or more) adjacent loci, the original locus identifier will be retired and the two nearby new numbers assigned. Note that in some cases this may result in non-monotonic increase of the identifiers along the chromosome.
- as the remaining scaffolds are mapped to chromosomes, loci on these scaffolds will be reassigned new Sb gene identifiers reflecting their appropriate chromosome and position, and the original SbXXsYYYYY number will be retired from use but noted as synonyms. Fewer than 700 predicted genes fall on these unmapped scaffolds.
- In subsequent assemblies, Sbi identifiers will be preserved for genes that unambiguously map forward.

### S4.3. Tandem gene clusters in sorghum

Tandem expansions were defined as all sets of peptides with a pairwise Blastp alignment of e-value better than  $1e^{-25}$  and two or less intervening genes. Characteristics of the largest tandem gene clusters of 8 or more genes in sorghum are briefly summarized below.

| First gene    | #  | 4DTV  |       | majority | pfam def                         |
|---------------|----|-------|-------|----------|----------------------------------|
|               |    | min   | max   | PFAMs    |                                  |
| Sb03g028560.1 | 15 | 0.042 | 0.568 | PF00067  | Cytochrome P450                  |
| Sb05g027740.1 | 14 | 0.091 | 0.500 | PF03514  | GRAS family transcription factor |
| Sb05g019890.1 | 14 | 0.000 | 0.545 | PF02797  | Chalcone and stilbene synthases  |



|               |    |       |       |         |                                         |
|---------------|----|-------|-------|---------|-----------------------------------------|
| Sb02g031700.1 | 14 | 0.000 | 0.538 | PF02519 | Auxin responsive protein                |
| Sb07g024600.1 | 13 | 0.000 | 0.412 | PF03087 | Arabidopsis protein of unknown function |
| Sb07g026660.1 | 13 | 0.067 | 0.556 | PF00651 | BTB/POZ domain                          |
| Sb04g003800.1 | 12 | 0.101 | 0.417 | PF00560 | Leucine Rich Repeat                     |
| Sb01g030930.1 | 12 | 0.083 | 0.590 | PF00043 | Glutathione S-transferase               |
| Sb06g029690.1 | 11 | 0.125 | 0.609 | PF07714 | Protein tyrosine kinase                 |
| Sb02g035420.1 | 11 | 0.145 | 0.542 | PF07714 | Protein tyrosine kinase                 |
| Sb07g001850.1 | 11 | 0.000 | 0.333 | PF03087 | Arabidopsis protein of unknown function |
| Sb06g029520.1 | 11 | 0.053 | 0.350 | PF01370 | NAD dependent epimerase/dehydratase     |
| Sb02g040660.1 | 11 | 0.063 | 0.538 | PF00141 | Peroxidase                              |
| Sb01g030780.1 | 11 | 0.163 | 0.563 | PF00043 | Glutathione S-transferase               |
| Sb01g029230.1 | 10 | 0.030 | 0.338 | PF03330 | Rare lipoprotein A (RlpA)-like          |
| Sb05g006750.1 | 10 | 0.000 | 0.034 | PF00023 | Ankyrin repeat                          |
| Sb01g039430.1 | 10 | 0.044 | 0.309 | PF00012 | Hsp70 protein                           |
| Sb05g027220.1 | 9  | 0.000 | 0.444 | PF00560 | Leucine Rich Repeat                     |
| Sb08g022370.1 | 9  | 0.013 | 0.475 | PF00314 | Thaumatococcus family                   |
| Sb06g022410.1 | 9  | 0.037 | 0.600 | PF00232 | Glycosyl hydrolase family 1             |
| Sb03g045780.1 | 9  | 0.050 | 0.511 | PF00043 | Glutathione S-transferase               |
| Sb05g005550.1 | 9  | 0.000 | 0.102 | .       | .                                       |
| Sb03g027430.1 | 8  | 0.000 | 0.384 | PF08370 | Plant PDR ABC transporter associated    |
| Sb10g029930.1 | 8  | 0.000 | 0.297 | PF07893 | Protein of unknown function (DUF1668)   |
| Sb05g004680.1 | 8  | 0.000 | 0.448 | PF07762 | Protein of unknown function (DUF1618)   |
| Sb03g001810.1 | 8  | 0.063 | 0.508 | PF00657 | GDSL-like Lipase/Acylhydrolase          |
| Sb10g026720.1 | 8  | 0.051 | 0.500 | PF00651 | BTB/POZ domain                          |
| Sb07g005230.1 | 8  | 0.000 | 0.477 | PF00190 | Cupin                                   |
| Sb02g025250.1 | 8  | 0.176 | 0.573 | PF00060 | Ligand-gated ion channel                |
| Sb10g030620.1 | 8  | 0.071 | 0.333 | .       | .                                       |
| Sb02g001210.1 | 8  | 0.064 | 0.422 | .       | .                                       |
| Sb02g034100.1 | 8  | 0.043 | 0.440 | .       | .                                       |
| Sb05g005756.1 | 8  | 0.059 | 0.231 | .       | .                                       |
| Sb03g041190.1 | 8  | 0.054 | 0.727 | .       | .                                       |

#### S4.4 Sorghum miRNA gene annotation

We annotated sorghum microRNAs in two steps. First, we mapped the existing sorghum miRNA entries of miRBase release 11<sup>33</sup> to the sorghum genome. Second, we used rice miRNAs from miRBase release 11 to annotate new sorghum miRNA genes since very recently several deep sequencing projects reported many new rice miRNAs. After a rice miRNA was mapped to the sorghum genome, the surrounding sequence was checked for hairpin structures. Those loci which fulfilled miRNA precursor secondary structures were annotated as sorghum miRNA genes. We have annotated 149 miRNA genes in the sorghum genome.

Natural antisense miRNAs (nat-miRNAs) were recently identified in monocots. They are located at the antisense strand of their target genes and contain long introns in their precursor sequences. Three sbi-miR444 precursors were mapped to the Sorghum

genome. Interestingly, one *sbi*-miR444 locus produces two precursors due to exon skipping. The targets of miR444 are MADS box proteins, important regulators of plant development.

The miR821 family has five members in Sorghum. Their precursor sequences are highly similar (~80% nucleotide similarity) to the rice ortholog miRNA precursors but the mature miRNA sequences are not identical. There are one or two nucleotide differences between the *osa*-miR821 sequence and the *sbi*-miR821 sequences.

**Table S15: miRNAs present in the sorghum genome**

| miRNA gene family | Known miRNA genes* | Paralogous miRNA genes | Total miRNA genes | miRNA genes found in cluster** (# of clusters) |
|-------------------|--------------------|------------------------|-------------------|------------------------------------------------|
| miR156            | 5                  | 4                      | 9                 | 2 (1)                                          |
| miR159            | 2                  | 0                      | 2                 |                                                |
| miR160            | 5                  | 1                      | 6                 |                                                |
| miR162            | 0                  | 1                      | 1                 |                                                |
| miR164            | 3                  | 2                      | 5                 |                                                |
| miR166            | 7                  | 4                      | 11                |                                                |
| miR167            | 7                  | 3                      | 10                |                                                |
| miR168            | 1                  | 0                      | 1                 |                                                |
| miR169            | 7                  | 7                      | 14                | 2 (1)                                          |
| miR171            | 6                  | 5                      | 11                |                                                |
| miR172            | 4                  | 1                      | 5                 |                                                |
| miR319            | 1                  | 1                      | 2                 |                                                |
| miR390            | 0                  | 1                      | 1                 |                                                |
| miR393            | 1                  | 1                      | 2                 |                                                |
| miR394            | 1                  | 1                      | 2                 |                                                |
| miR395            | 5                  | 7                      | 12                | 11 (3)                                         |
| miR396            | 3                  | 2                      | 5                 |                                                |
| miR397            | 0                  | 1                      | 1                 |                                                |
| miR399            | 9                  | 1                      | 10                |                                                |
| miR408            | 0                  | 1                      | 1                 |                                                |
| miR437            | 0                  | 23                     | 23                |                                                |
| miR444            | 0                  | 3                      | 3                 |                                                |
| miR528            | 0                  | 1                      | 1                 |                                                |
| miR529            | 0                  | 1                      | 1                 |                                                |
| miR821            | 0                  | 5                      | 5                 |                                                |
| miR1432           | 0                  | 1                      | 1                 |                                                |
| miR1435           | 0                  | 2                      | 2                 |                                                |
| miR1436           | 0                  | 1                      | 1                 |                                                |
| miR1439           | 0                  | 1                      | 1                 |                                                |
| Total             | 67                 | 82                     | 149               | 15 (5)                                         |

\* Based on miRBase v11  
 \*\* Using clustering length of 500 nucleotides

**Table S16: Position of known sorghum miRNAs in the genome**

| miRNA | Precursor Length | Chromosome | Precursor Start | Precursor End | Strand |
|-------|------------------|------------|-----------------|---------------|--------|
|-------|------------------|------------|-----------------|---------------|--------|

|             |     |    |          |          |     |
|-------------|-----|----|----------|----------|-----|
| sbi-MIR156a | 84  | 4  | 5373547  | 5373630  | [-] |
| sbi-MIR156b | 84  | 3  | 3473048  | 3473131  | [-] |
| sbi-MIR156c | 95  | 3  | 3473369  | 3473463  | [-] |
| sbi-MIR156d | 125 | 2  | 62836722 | 62836846 | [-] |
| sbi-MIR156e | 123 | 10 | 55009872 | 55009994 | [+] |
| sbi-MIR159  | 226 | 3  | 8194328  | 8194553  | [-] |
| sbi-MIR159b | 253 | 3  | 1225082  | 1225334  | [-] |
| sbi-MIR160a | 84  | 4  | 4236169  | 4236252  | [-] |
| sbi-MIR160b | 82  | 10 | 56834481 | 56834562 | [+] |
| sbi-MIR160c | 83  | 7  | 2730531  | 2730613  | [+] |
| sbi-MIR160d | 100 | 1  | 5215950  | 5216049  | [-] |
| sbi-MIR160e | 95  | 2  | 2925262  | 2925356  | [-] |
| sbi-MIR164  | 126 | 9  | 39002547 | 39002672 | [-] |
| sbi-MIR164b | 111 | 4  | 64881672 | 64881782 | [-] |
| sbi-MIR164c | 153 | 1  | 61593529 | 61593681 | [-] |
| sbi-MIR166a | 108 | 1  | 17295171 | 17295278 | [-] |
| sbi-MIR166b | 72  | 1  | 7426521  | 7426592  | [+] |
| sbi-MIR166c | 94  | 1  | 69265260 | 69265353 | [-] |
| sbi-MIR166d | 87  | 4  | 63283312 | 63283398 | [-] |
| sbi-MIR166e | 151 | 2  | 61439831 | 61439981 | [+] |
| sbi-MIR166f | 139 | 4  | 64225347 | 64225485 | [-] |
| sbi-MIR166g | 134 | 4  | 64225078 | 64225211 | [-] |
| sbi-MIR167a | 96  | 1  | 4354681  | 4354776  | [+] |
| sbi-MIR167b | 198 | 1  | 7272352  | 7272549  | [+] |
| sbi-MIR167c | 133 | 10 | 56170660 | 56170790 | [+] |
| sbi-MIR167d | 148 | 2  | 4993335  | 4993482  | [-] |
| sbi-MIR167e | 179 | 8  | 51954679 | 51954857 | [+] |
| sbi-MIR167f | 179 | 1  | 26225027 | 26225205 | [+] |
| sbi-MIR167g | 123 | 3  | 64088364 | 64088486 | [-] |
| sbi-MIR168  | 106 | 4  | 2246316  | 2246421  | [-] |
| sbi-MIR169a | 91  | 3  | 10825168 | 10825258 | [+] |
| sbi-MIR169b | 102 | 10 | 55869177 | 55869278 | [-] |
| sbi-MIR169c | 126 | 6  | 39830386 | 39830511 | [+] |
| sbi-MIR169d | 125 | 6  | 39791164 | 39791266 | [+] |
| sbi-MIR169f | 148 | 2  | 64603670 | 64603817 | [+] |
| sbi-MIR169g | 152 | 2  | 64606503 | 64606654 | [+] |
| sbi-MIR169i | 169 | 5  | 17050323 | 17050491 | [+] |
| sbi-MIR171a | 161 | 1  | 7845711  | 7845871  | [-] |
| sbi-MIR171b | 132 | 7  | 7609099  | 7609230  | [+] |
| sbi-MIR171c | 109 | 2  | 17125729 | 17125837 | [-] |
| sbi-MIR171d | 154 | 1  | 71039535 | 71039687 | [-] |
| sbi-MIR171e | 124 | 6  | 54609030 | 54609153 | [+] |
| sbi-MIR171f | 119 | 4  | 62099903 | 62100021 | [-] |
| sbi-MIR172a | 102 | 9  | 58962031 | 58962132 | [-] |
| sbi-MIR172b | 170 | 3  | 74241513 | 74241682 | [-] |
| sbi-MIR172c | 119 | 4  | 67015298 | 67015416 | [-] |
| sbi-MIR172e | 115 | 2  | 14181315 | 14181429 | [-] |
| sbi-MIR319  | 249 | 3  | 1240163  | 1240411  | [+] |
| sbi-MIR393  | 139 | 3  | 6521844  | 6521966  | [+] |
| sbi-MIR394a | 110 | 2  | 66910962 | 66911071 | [+] |
| sbi-MIR395a | 150 | 6  | 58760409 | 58760558 | [+] |
| sbi-MIR395b | 105 | 6  | 58761003 | 58761107 | [+] |
| sbi-MIR395d | 104 | 6  | 58197343 | 58197445 | [-] |
| sbi-MIR395e | 105 | 6  | 58197534 | 58197638 | [-] |

|             |     |    |          |          |     |
|-------------|-----|----|----------|----------|-----|
| sbi-MIR395f | 122 | 6  | 58196833 | 58196954 | [-] |
| sbi-MIR396a | 125 | 4  | 66092514 | 66092638 | [-] |
| sbi-MIR396b | 128 | 10 | 4424888  | 4425015  | [+] |
| sbi-MIR396c | 162 | 4  | 66085287 | 66085448 | [+] |
| sbi-MIR399a | 137 | 3  | 61886672 | 61886801 | [+] |
| sbi-MIR399b | 123 | 4  | 9842715  | 9842828  | [-] |
| sbi-MIR399c | 130 | 9  | 55682225 | 55682354 | [-] |
| sbi-MIR399d | 205 | 10 | 1544093  | 1544297  | [+] |
| sbi-MIR399e | 126 | 9  | 55683792 | 55683917 | [+] |
| sbi-MIR399f | 120 | 10 | 48048104 | 48048223 | [-] |
| sbi-MIR399g | 125 | 9  | 55688228 | 55688352 | [+] |
| sbi-MIR399h | 132 | 10 | 48050465 | 48050596 | [+] |
| sbi-MIR399i | 121 | 6  | 55042923 | 55043043 | [+] |

**Table S17:** Position of newly detected miRNAs (paralog mapping) in the sorghum genome

| miRNA family | Paralog Id    | Precursor Length | Chromosome | Precursor Start | Precursor End | Strand |
|--------------|---------------|------------------|------------|-----------------|---------------|--------|
| 156          | sbi-MIR156.p1 | 128              | 2          | 59375957        | 59376084      | [+]    |
| 156          | sbi-MIR156.p2 | 89               | 4          | 55586941        | 55587029      | [-]    |
| 156          | sbi-MIR156.p3 | 94               | 6          | 50885046        | 50885139      | [-]    |
| 156          | sbi-MIR156.p4 | 121              | 7          | 55808117        | 55808237      | [+]    |
| 160          | sbi-MIR160.p1 | 110              | 7          | 63646187        | 63646296      | [-]    |
| 162          | sbi-MIR162.p1 | 127              | 4          | 55056602        | 55056728      | [+]    |
| 164          | sbi-MIR164.p1 | 160              | 2          | 76402755        | 76402914      | [-]    |
| 164          | sbi-MIR164.p2 | 205              | 9          | 45090953        | 45091157      | [+]    |
| 166          | sbi-MIR166.p1 | 185              | 10         | 59811964        | 59812025      | [-]    |
| 166          | sbi-MIR166.p2 | 86               | 1          | 27013404        | 27013489      | [+]    |
| 166          | sbi-MIR166.p3 | 108              | 1          | 72676204        | 72676311      | [-]    |
| 166          | sbi-MIR166.p4 | 103              | 8          | 39559277        | 39559379      | [+]    |
| 167          | sbi-MIR167.p1 | 90               | 1          | 69498654        | 69498743      | [-]    |
| 167          | sbi-MIR167.p2 | 157              | 4          | 4488304         | 4488460       | [-]    |
| 167          | sbi-MIR167.p3 | 132              | 8          | 51952391        | 51952522      | [+]    |
| 169          | sbi-MIR169.p1 | 109              | 2          | 58896558        | 58896666      | [+]    |
| 169          | sbi-MIR169.p2 | 98               | 4          | 49253706        | 49253803      | [+]    |
| 169          | sbi-MIR169.p3 | 123              | 4          | 58034693        | 58034815      | [+]    |
| 169          | sbi-MIR169.p4 | 97               | 6          | 56718764        | 56718860      | [-]    |
| 169          | sbi-MIR169.p5 | 97               | 7          | 61062640        | 61062736      | [+]    |
| 169          | sbi-MIR169.p6 | 92               | 7          | 61068027        | 61068118      | [-]    |
| 169          | sbi-MIR169.p7 | 93               | 7          | 61071181        | 61071273      | [+]    |
| 171          | sbi-MIR171.p1 | 77               | 10         | 54088668        | 54088744      | [+]    |
| 171          | sbi-MIR171.p2 | 81               | 1          | 15608735        | 15608815      | [-]    |
| 171          | sbi-MIR171.p3 | 90               | 1          | 52558149        | 52558238      | [-]    |
| 171          | sbi-MIR171.p4 | 108              | 4          | 5853293         | 5853400       | [-]    |
| 171          | sbi-MIR171.p5 | 87               | 6          | 57730663        | 57730749      | [-]    |
| 172          | sbi-MIR172.p1 | 88               | 2          | 22209593        | 22209680      | [+]    |
| 319          | sbi-MIR319.p1 | 179              | 3          | 58360214        | 58360392      | [-]    |
| 390          | sbi-MIR390.p1 | 179              | 1          | 2870994         | 2871172       | [+]    |
| 393          | sbi-MIR393.p1 | 84               | 6          | 61406228        | 61406311      | [-]    |
| 394          | sbi-MIR394.p1 | 77               | 4          | 62277173        | 62277249      | [-]    |

|      |                |     |    |          |          |     |
|------|----------------|-----|----|----------|----------|-----|
| 395  | sbi-MIR395.p1  | 73  | 6  | 58197025 | 58197097 | [-] |
| 395  | sbi-MIR395.p2  | 68  | 6  | 58761182 | 58761249 | [+] |
| 395  | sbi-MIR395.p3  | 81  | 6  | 58761343 | 58761423 | [+] |
| 395  | sbi-MIR395.p4  | 97  | 7  | 4657883  | 4657979  | [+] |
| 395  | sbi-MIR395.p5  | 87  | 7  | 4658066  | 4658152  | [+] |
| 395  | sbi-MIR395.p6  | 80  | 7  | 4658236  | 4658315  | [+] |
| 395  | sbi-MIR395.p7  | 84  | 7  | 4658542  | 4658625  | [+] |
| 396  | sbi-MIR396.p1  | 95  | 4  | 67655140 | 67655234 | [-] |
| 396  | sbi-MIR396.p2  | 189 | 6  | 60827025 | 60827213 | [+] |
| 397  | sbi-MIR397.p1  | 91  | 4  | 4027097  | 4027187  | [-] |
| 399  | sbi-MIR399.p1  | 93  | 4  | 9862936  | 9863028  | [-] |
| 408  | sbi-MIR408.p1  | 205 | 3  | 15944292 | 15944496 | [+] |
| 437  | sbi-MIR437.p1  | 190 | 10 | 3078189  | 3078378  | [-] |
| 437  | sbi-MIR437.p2  | 171 | 1  | 19827219 | 19827389 | [+] |
| 437  | sbi-MIR437.p3  | 175 | 1  | 20771120 | 20771294 | [+] |
| 437  | sbi-MIR437.p4  | 136 | 1  | 23998927 | 23999062 | [-] |
| 437  | sbi-MIR437.p5  | 101 | 1  | 54176829 | 54176929 | [+] |
| 437  | sbi-MIR437.p6  | 174 | 1  | 56906489 | 56906662 | [-] |
| 437  | sbi-MIR437.p7  | 176 | 1  | 59496276 | 59496451 | [-] |
| 437  | sbi-MIR437.p8  | 170 | 1  | 60249197 | 60249366 | [+] |
| 437  | sbi-MIR437.p9  | 172 | 1  | 73814238 | 73814409 | [+] |
| 437  | sbi-MIR437.p10 | 172 | 1  | 9824853  | 9825024  | [-] |
| 437  | sbi-MIR437.p11 | 170 | 2  | 45985879 | 45986048 | [+] |
| 437  | sbi-MIR437.p12 | 174 | 3  | 49109184 | 49109357 | [-] |
| 437  | sbi-MIR437.p13 | 182 | 3  | 6385582  | 6385763  | [-] |
| 437  | sbi-MIR437.p14 | 175 | 4  | 66322673 | 66322847 | [-] |
| 437  | sbi-MIR437.p15 | 188 | 4  | 8595515  | 8595702  | [-] |
| 437  | sbi-MIR437.p16 | 160 | 6  | 10908271 | 10908430 | [-] |
| 437  | sbi-MIR437.p17 | 180 | 6  | 35895917 | 35896096 | [-] |
| 437  | sbi-MIR437.p18 | 176 | 6  | 49901016 | 49901191 | [-] |
| 437  | sbi-MIR437.p19 | 170 | 7  | 5519054  | 5519223  | [+] |
| 437  | sbi-MIR437.p20 | 160 | 9  | 47617262 | 47617421 | [+] |
| 437  | sbi-MIR437.p21 | 164 | 9  | 53125183 | 53125346 | [+] |
| 437  | sbi-MIR437.p22 | 114 | 9  | 53472511 | 53472624 | [+] |
| 437  | sbi-MIR437.p23 | 173 | 9  | 55290467 | 55290639 | [+] |
| 444* | sbi-MIR444.p1  |     | 4  | 59018312 | 59021783 | [+] |
| 444* | sbi-MIR444.p2  |     | 4  | 53728538 | 53723195 | [+] |
| 444  | sbi-MIR444.p3  | 583 | 6  | 48663114 | 48663697 | [-] |
| 528  | sbi-MIR528.p1  | 84  | 1  | 71476711 | 71476794 | [-] |
| 529  | sbi-MIR529.p1  | 116 | 4  | 44092392 | 44092507 | [+] |
| 821  | sbi-MIR821.p1  | 285 | 1  | 47182770 | 47183054 | [-] |
| 821  | sbi-MIR821.p2  | 273 | 2  | 47490926 | 47491198 | [-] |
| 821  | sbi-MIR821.p3  | 285 | 2  | 60192106 | 60192390 | [-] |
| 821  | sbi-MIR821.p4  | 264 | 6  | 29609545 | 29609808 | [+] |
| 821  | sbi-MIR821.p5  | 269 | 9  | 45069956 | 45070224 | [-] |
| 1432 | sbi-MIR1432.p1 | 184 | 2  | 71755920 | 71756103 | [-] |
| 1435 | sbi-MIR1435.p1 | 287 | 2  | 60539286 | 60539572 | [+] |
| 1435 | sbi-MIR1435.p2 | 267 | 7  | 59967771 | 59968037 | [-] |
| 1436 | sbi-MIR1436.p1 | 475 | 9  | 42986140 | 42986614 | [+] |
| 1439 | sbi-MIR1439.p1 | 475 | 9  | 5350892  | 5351366  | [-] |

\*miR444  
contains a  
large intron.

## S4.5 Rice annotations used for comparisons

Two annotations of *O. sativa* subsp. *japonica* were used: the manually curated and expressed-sequence focused “RAP2” annotation from the Rice Annotation Project<sup>29</sup> and the automated “TIGR5” annotation from TIGR. These annotations share a core of 26,267 common genes, but the TIGR5 set is significantly larger (41,078 genes total) as it includes genes of unknown function that are likely to be ORFs related to repetitive elements. The RAP2 set is more conservative, and is more likely to omit genes without EST evidence, but also retains a modest number of repeat-derived ORFs. We used both rice annotations in comparisons with sorghum, adopting the following filterings of the full datasets.

### S4.5.1 Filtering of RAP2 rice annotation data

Rice genes were downloaded from the RAP Rice Annotation Project (31,439 genes), release 2 from <http://rapdb.dna.affrc.go.jp/rapdownload/>. In the RAP2 annotation a total of 2,049 of the predicted genes were based on ESTs and not assigned to chromosomal locations in rice. These 2,049 genes were compared to three different independent rice whole genome sequences, the BGI indica WGS genome (<http://rise.genomics.org.cn/rice/index2.jsp>), the Syngenta, japonica WGS genome (<http://rise.genomics.org.cn/rice/index2.jsp>) and the IRGSP japonica BAC based genome assembly (<http://rapdb.dna.affrc.go.jp/rapdownload/>). Of the 2,049 unanchored predicted genes 1,029 showed no similarity to any of the three rice genome assemblies when compared with blastn with e-value threshold  $e < 1e-6$ . Of the remaining 1,020 genes, 897 were mostly repetitive genes that could have been assigned to multiple locations or were “close” but not perfect matches to existing sequences in the IRGSP. The remaining 123 genes did not match the IRGSP assembly but matched one or both of the WGS assemblies and presumably belonged to regions of the rice genome for which a BAC had not been sequenced.

The 1,029 genes that showed no matches to any of the rice genome assemblies were presumed to be largely contaminations of the EST libraries from other sources, likely mostly fungi or yeasts. These 1,029 rice genes were removed from later comparative analysis, leaving 30,410 genes for comparative analysis, with 29,390 of these including positional information.

### S4.5.2 TIGR5 gene set for rice

A total of 56,312 longest-at-locus genes were downloaded from TIGR. The 15,424 genes annotated by TIGR as TE-related were removed from the comparison data set, as well as 470 genes that had 10 or more blast ( $1e-10$ ) hits to other rice genes and contained a

transposon-related PFAM domain as the only annotation.

There are 4,006 *sbi1\_4* genes that have a near mutual-best hit to rice (“C-Score” >0.9) in the set of high-confidence genes without a syntenic ortholog. These orthologs have a fourfold divergence comparable to typical sorghum-rice orthologous segments, and are evidently bona fide orthologs that have moved from their syntenic position.

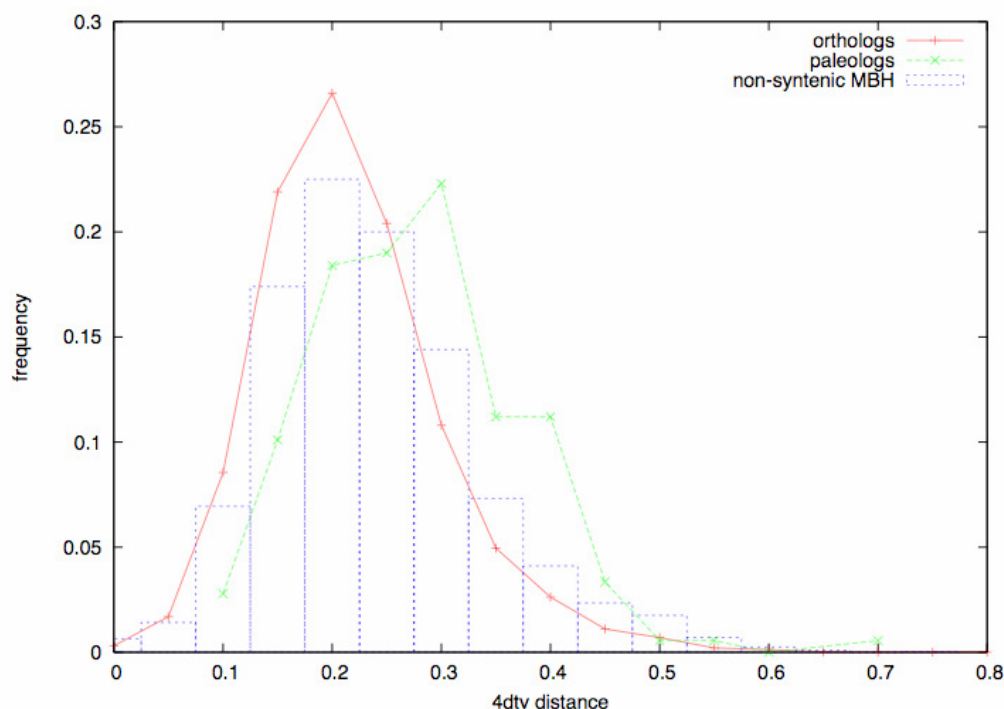

#### S4.6 Protein domains in the Sorghum genome

To gain insight into protein functions and biological processes that are different between *Sorghum* and *Arabidopsis* (TIGR7), rice (RAP2) and poplar, we retrieved the respective PFAM domains<sup>34</sup> from SIMAP<sup>35</sup>. We selected protein domains for which abundance significantly differed between these organisms by applying a Fisher’s Exact Test. Table S18 shows the PFAM domains with statistical significance (p-value < 0.01).

#### Table S18: Over- and underrepresented PFAM domains in the genome of *Sorghum bicolor*

The table depicts the comparison of percentages and absolute numbers of the respective over- and underrepresented domains. With respect to rice, the RAP2 annotation has been used. Fields highlighted in green depict domain signatures that are overrepresented in Sorghum while fields highlighted in red depict domains underrepresented in Sorghum. Some gene families amplified in sorghum contain motifs associated with transposable elements (Zinc knuckle, haT family dimerization domain,



reverse transcriptase, transposase family *Tnp2*, transposase DDE domain, and putative gypsy type transposons), and may have escaped repeat masking or evolved from transposable elements by neofunctionalization, the latter consistent with their presence in the manually annotated rice genome. Protein domains that are indicative of transposable elements are marked with an asterisk.

| Pfam    | Description                                                    | all  | Sb  | [%]  | Os  | [%]  | At  | [%]  | Pt  | [%]  | p-val   |
|---------|----------------------------------------------------------------|------|-----|------|-----|------|-----|------|-----|------|---------|
| PF00067 | Cytochrome P450                                                | 1160 | 326 | 1.10 | 228 | 0.98 | 283 | 0.79 | 323 | 0.86 | 1.6E-04 |
| PF00098 | * Zinc knuckle                                                 | 434  | 179 | 0.60 | 64  | 0.27 | 91  | 0.25 | 100 | 0.27 | 2.1E-16 |
| PF01370 | NAD dependent epimerase/dehydratase family                     | 520  | 154 | 0.52 | 108 | 0.46 | 114 | 0.32 | 144 | 0.38 | 8.0E-04 |
| PF04434 | SWIM zinc finger                                               | 347  | 151 | 0.51 | 77  | 0.33 | 83  | 0.23 | 36  | 0.10 | 1.8E-16 |
| PF00651 | BTB/POZ domain                                                 | 291  | 127 | 0.43 | 66  | 0.28 | 54  | 0.15 | 44  | 0.12 | 3.2E-14 |
| PF07993 | Male sterility protein                                         | 372  | 109 | 0.37 | 79  | 0.34 | 90  | 0.25 | 94  | 0.25 | 5.9E-03 |
| PF05699 | hAT family dimerisation domain                                 | 281  | 100 | 0.34 | 66  | 0.28 | 36  | 0.10 | 79  | 0.21 | 3.5E-06 |
| PF03101 | FAR1 DNA-binding domain                                        | 193  | 91  | 0.31 | 39  | 0.17 | 26  | 0.07 | 37  | 0.10 | 6.4E-13 |
| PF03330 | Rare lipoprotein A (RlpA)-like double-psi beta-barrel          | 241  | 91  | 0.31 | 51  | 0.22 | 42  | 0.12 | 57  | 0.15 | 5.3E-07 |
| PF00026 | Eukaryotic aspartyl protease                                   | 285  | 86  | 0.29 | 56  | 0.24 | 73  | 0.20 | 70  | 0.19 | 5.9E-03 |
| PF00917 | MATH domain                                                    | 232  | 85  | 0.29 | 41  | 0.18 | 82  | 0.23 | 24  | 0.06 | 4.9E-06 |
| PF01357 | Pollen allergen                                                | 220  | 82  | 0.28 | 58  | 0.25 | 40  | 0.11 | 40  | 0.11 | 3.4E-06 |
| PF03372 | * Endonuclease/Exonuclease/phosphatase family                  | 234  | 75  | 0.25 | 30  | 0.13 | 68  | 0.19 | 61  | 0.16 | 1.8E-03 |
| PF00078 | * Reverse transcriptase (RNA-dependent DNA polymerase)         | 168  | 68  | 0.23 | 22  | 0.09 | 66  | 0.18 | 12  | 0.03 | 7.8E-07 |
| PF05970 | Eukaryotic protein of unknown function (DUF889)                | 116  | 66  | 0.22 | 18  | 0.08 | 30  | 0.08 | 2   | 0.01 | 1.3E-14 |
| PF04578 | Protein of unknown function, DUF594                            | 146  | 63  | 0.21 | 41  | 0.18 | 6   | 0.02 | 36  | 0.10 | 1.3E-07 |
| PF08330 | Protein of unknown function (DUF1723)                          | 118  | 54  | 0.18 | 31  | 0.13 | 17  | 0.05 | 16  | 0.04 | 9.8E-08 |
| PF08541 | 3-Oxoacyl-[acyl-carrier-protein (ACP)] synthase III C terminal | 163  | 52  | 0.17 | 38  | 0.16 | 25  | 0.07 | 48  | 0.13 | 9.0E-03 |
| PF02797 | Chalcone and stilbene synthases, C-terminal domain             | 159  | 51  | 0.17 | 36  | 0.15 | 25  | 0.07 | 47  | 0.13 | 8.6E-03 |
| PF07762 | Protein of unknown function (DUF1618)                          | 84   | 50  | 0.17 | 34  | 0.15 | 0   | 0.00 | 0   | 0.00 | 1.9E-12 |
| PF00891 | O-methyltransferase                                            | 134  | 46  | 0.15 | 33  | 0.14 | 21  | 0.06 | 34  | 0.09 | 3.0E-03 |
| PF07893 | Protein of unknown function (DUF1668)                          | 80   | 45  | 0.15 | 35  | 0.15 | 0   | 0.00 | 0   | 0.00 | 3.2E-10 |
| PF00248 | Aldo/keto reductase family                                     | 131  | 44  | 0.15 | 25  | 0.11 | 27  | 0.08 | 35  | 0.09 | 5.7E-03 |
| PF04937 | Protein of unknown function (DUF 659)                          | 78   | 42  | 0.14 | 12  | 0.05 | 11  | 0.03 | 13  | 0.03 | 7.4E-09 |
| PF04398 | Protein of unknown function, DUF538                            | 126  | 42  | 0.14 | 31  | 0.13 | 23  | 0.06 | 30  | 0.08 | 7.9E-03 |
| PF02992 | * Transposase family tnp2                                      | 73   | 40  | 0.13 | 9   | 0.04 | 24  | 0.07 | 0   | 0.00 | 8.6E-09 |
| PF04844 | Protein of unknown function, DUF623                            | 101  | 36  | 0.12 | 22  | 0.09 | 17  | 0.05 | 26  | 0.07 | 4.0E-03 |
| PF00195 | Chalcone and stilbene synthases, N-terminal domain             | 73   | 34  | 0.11 | 18  | 0.08 | 4   | 0.01 | 17  | 0.05 | 1.4E-05 |
| PF03087 | Arabidopsis protein of unknown function                        | 89   | 32  | 0.11 | 16  | 0.07 | 17  | 0.05 | 24  | 0.06 | 5.6E-03 |
| PF04577 | Protein of unknown function (DUF563)                           | 68   | 29  | 0.10 | 22  | 0.09 | 9   | 0.03 | 8   | 0.02 | 3.8E-04 |
| PF01598 | NA                                                             | 74   | 27  | 0.09 | 15  | 0.06 | 20  | 0.06 | 12  | 0.03 | 8.3E-03 |
| PF06839 | GRF zinc finger                                                | 47   | 26  | 0.09 | 6   | 0.03 | 10  | 0.03 | 5   | 0.01 | 2.7E-06 |
| PF07645 | Calcium binding EGF domain                                     | 53   | 26  | 0.09 | 18  | 0.08 | 5   | 0.01 | 4   | 0.01 | 4.5E-05 |
| PF00092 | von Willebrand factor type A domain                            | 63   | 24  | 0.08 | 14  | 0.06 | 15  | 0.04 | 10  | 0.03 | 6.8E-03 |
| PF00280 | Potato inhibitor I family                                      | 57   | 23  | 0.08 | 6   | 0.03 | 6   | 0.02 | 22  | 0.06 | 3.5E-03 |
| PF03088 | Strictosidine synthase                                         | 61   | 23  | 0.08 | 10  | 0.04 | 17  | 0.05 | 11  | 0.03 | 9.2E-03 |
| PF04601 | Protein of unknown function (DUF569)                           | 45   | 21  | 0.07 | 8   | 0.03 | 7   | 0.02 | 9   | 0.02 | 5.6E-04 |
| PF01161 | Phosphatidylethanolamine-binding protein                       | 48   | 20  | 0.07 | 14  | 0.06 | 7   | 0.02 | 7   | 0.02 | 4.0E-03 |
| PF00079 | Serpin (serine protease inhibitor)                             | 39   | 18  | 0.06 | 7   | 0.03 | 11  | 0.03 | 3   | 0.01 | 1.6E-03 |



|         |                                                     |     |    |      |    |      |     |      |    |      |         |
|---------|-----------------------------------------------------|-----|----|------|----|------|-----|------|----|------|---------|
| PF08450 | SMP-30/Gluconolactonase/LRE-like region             | 42  | 18 | 0.06 | 9  | 0.04 | 8   | 0.02 | 7  | 0.02 | 4.4E-03 |
| PF01559 | Zein seed storage protein                           | 14  | 14 | 0.05 | 0  | 0.00 | 0   | 0.00 | 0  | 0.00 | 1.6E-09 |
| PF01609 | * Transposase DDE domain                            | 31  | 14 | 0.05 | 9  | 0.04 | 6   | 0.02 | 2  | 0.01 | 6.6E-03 |
| PF08224 | Domain of unknown function (DUF1719)                | 21  | 12 | 0.04 | 9  | 0.04 | 0   | 0.00 | 0  | 0.00 | 9.5E-04 |
| PF08787 | Alginate lyase                                      | 19  | 11 | 0.04 | 2  | 0.01 | 0   | 0.00 | 6  | 0.02 | 1.3E-03 |
| PF04195 | * Putative gypsy type transposon                    | 10  | 10 | 0.03 | 0  | 0.00 | 0   | 0.00 | 0  | 0.00 | 5.2E-07 |
| PF02496 | ABA/WDS induced protein                             | 14  | 8  | 0.03 | 4  | 0.02 | 0   | 0.00 | 2  | 0.01 | 7.0E-03 |
| PF01657 | Domain of unknown function DUF26                    | 315 | 56 | 0.19 | 55 | 0.24 | 113 | 0.32 | 91 | 0.24 | 8.2E-03 |
| PF00295 | Glycosyl hydrolases family 28                       | 230 | 38 | 0.13 | 34 | 0.15 | 80  | 0.22 | 78 | 0.21 | 6.1E-03 |
| PF00132 | * Bacterial transferase hexapeptide (three repeats) | 126 | 16 | 0.05 | 19 | 0.08 | 33  | 0.09 | 58 | 0.15 | 1.7E-03 |
| PF00407 | Pathogenesis-related protein Bet v I family         | 106 | 14 | 0.05 | 12 | 0.05 | 33  | 0.09 | 47 | 0.13 | 6.0E-03 |
| PF07649 | C1-like domain                                      | 223 | 7  | 0.02 | 7  | 0.03 | 176 | 0.49 | 33 | 0.09 | 1.5E-17 |
| PF03107 | C1 domain                                           | 201 | 5  | 0.02 | 4  | 0.02 | 166 | 0.46 | 26 | 0.07 | 2.9E-17 |
| PF04396 | Protein of unknown function, DUF537                 | 49  | 4  | 0.01 | 5  | 0.02 | 31  | 0.09 | 9  | 0.02 | 5.0E-03 |
| PF08137 | DVL family                                          | 48  | 4  | 0.01 | 8  | 0.03 | 24  | 0.07 | 12 | 0.03 | 6.1E-03 |
| PF08268 | F-box associated                                    | 125 | 1  | 0.00 | 1  | 0.00 | 117 | 0.33 | 6  | 0.02 | 1.1E-13 |
| PF00197 | Trypsin and protease inhibitor                      | 30  | 1  | 0.00 | 1  | 0.00 | 8   | 0.02 | 20 | 0.05 | 3.3E-03 |
| PF08491 | Squalene epoxidase                                  | 26  | 1  | 0.00 | 2  | 0.01 | 7   | 0.02 | 16 | 0.04 | 8.4E-03 |
| PF07734 | F-box associated                                    | 181 | 0  | 0.00 | 1  | 0.00 | 160 | 0.45 | 20 | 0.05 | 8.0E-22 |

#### S4.7 Protein family comparison across angiosperms

To identify and estimate the size of gene families in the *Sorghum* genome we applied OrthoMCL<sup>36</sup>. OrthoMCL allows one to infer potentially-orthologous groups of proteins across *Sorghum bicolor*, *Arabidopsis thaliana*, *Oryza sativa* and *Populus trichocarpa*. It can group orthologous as well as paralogous sequences over multiple eukaryotic taxa by using a Markov Cluster algorithm<sup>37</sup>. The algorithm calculates global rather than local similarities to cluster proteins into families. Consequently, proteins are not clustered according to individual protein domains but to overall conservation. We used the OrthoMCL standard settings (Blastp e-value < 1e-05) to compute the all-against-all similarities. See Figure 4 in the main text.

#### S4.8 Sorghum specific protein families

In addition to the interspecies comparison of protein families, we compared the PFAM domains of proteins families that are specific for sorghum with the PFAM domains of the protein families that are shared with *Arabidopsis*, rice and poplar, respectively (Table S20).

#### Table S19: Over- and underrepresented PFAM domains of *Sorghum* specific protein families

The table depicts the comparison of percentages and absolute numbers of the respective over- and underrepresented domains. Fields highlighted in green represent PFAM domains that are overrepresented in sorghum specific protein families while fields

highlighted in red represent underrepresented domains. Protein domains which are indicative of transposable elements are marked with an asterisk.

| Pfam-Domain | Description                                           | all | Sb specific |      | Sb non-specific |      | p-value |
|-------------|-------------------------------------------------------|-----|-------------|------|-----------------|------|---------|
|             |                                                       |     | OrthoMCL    | [%]  | OrthoMCL        | [%]  |         |
| PF00646     | F-box domain                                          | 442 | 183         | 9.69 | 259             | 1.08 | 2.2E-91 |
| PF00098     | * Zinc knuckle                                        | 161 | 51          | 2.70 | 110             | 0.46 | 6.0E-20 |
| PF00097     | Zinc finger, C3HC4 type (RING finger)                 | 298 | 39          | 2.07 | 259             | 1.08 | 2.9E-04 |
| PF00651     | BTB/POZ domain                                        | 86  | 38          | 2.01 | 48              | 0.20 | 5.2E-21 |
| PF04434     | SWIM zinc finger                                      | 142 | 36          | 1.91 | 106             | 0.44 | 2.6E-11 |
| PF02992     | * Transposase family tnp2                             | 37  | 35          | 1.85 | 2               | 0.01 | 7.0E-38 |
| PF04578     | Protein of unknown function, DUF594                   | 46  | 32          | 1.69 | 14              | 0.06 | 2.8E-26 |
| PF00249     | Myb-like DNA-binding domain                           | 213 | 27          | 1.43 | 186             | 0.78 | 3.6E-03 |
| PF00931     | NB-ARC domain                                         | 198 | 26          | 1.38 | 172             | 0.72 | 2.6E-03 |
| PF08330     | Protein of unknown function (DUF1723)                 | 45  | 25          | 1.32 | 20              | 0.08 | 2.5E-17 |
| PF07723     | Leucine Rich Repeat                                   | 77  | 25          | 1.32 | 52              | 0.22 | 9.1E-11 |
| PF00917     | MATH domain                                           | 60  | 24          | 1.27 | 36              | 0.15 | 1.2E-12 |
| PF02902     | Ulp1 protease family, C-terminal catalytic domain     | 28  | 21          | 1.11 | 7               | 0.03 | 8.6E-19 |
| PF00106     | short chain dehydrogenase                             | 125 | 21          | 1.11 | 104             | 0.43 | 2.7E-04 |
| PF01370     | NAD dependent epimerase/dehydratase family            | 134 | 20          | 1.06 | 114             | 0.48 | 1.7E-03 |
| PF03478     | Protein of unknown function (DUF295)                  | 58  | 19          | 1.01 | 39              | 0.16 | 1.4E-08 |
| PF00026     | Eukaryotic aspartyl protease                          | 71  | 19          | 1.01 | 52              | 0.22 | 5.0E-07 |
| PF00234     | Protease inhibitor/seed storage/LTP family            | 88  | 19          | 1.01 | 69              | 0.29 | 1.6E-05 |
| PF07893     | Protein of unknown function (DUF1668)                 | 38  | 18          | 0.95 | 20              | 0.08 | 2.6E-11 |
| PF03101     | FAR1 DNA-binding domain                               | 86  | 18          | 0.95 | 68              | 0.28 | 4.0E-05 |
| PF00891     | O-methyltransferase                                   | 37  | 17          | 0.90 | 20              | 0.08 | 1.7E-10 |
| PF00023     | Ankyrin repeat                                        | 113 | 17          | 0.90 | 96              | 0.40 | 3.4E-03 |
| PF00141     | Peroxidase                                            | 120 | 17          | 0.90 | 103             | 0.43 | 6.3E-03 |
| PF03330     | Rare lipoprotein A (RlpA)-like double-psi beta-barrel | 78  | 16          | 0.85 | 62              | 0.26 | 1.4E-04 |
| PF07993     | Male sterility protein                                | 96  | 16          | 0.85 | 80              | 0.33 | 1.5E-03 |
| PF08387     | FBD                                                   | 30  | 15          | 0.79 | 15              | 0.06 | 4.5E-10 |
| PF00657     | GDSL-like Lipase/Acylhydrolase                        | 106 | 15          | 0.79 | 91              | 0.38 | 1.0E-02 |
| PF01559     | Zein seed storage protein                             | 14  | 14          | 0.74 | 0               | 0.00 | 1.2E-16 |
| PF02519     | Auxin responsive protein                              | 66  | 14          | 0.74 | 52              | 0.22 | 2.4E-04 |
| PF02362     | B3 DNA binding domain                                 | 71  | 14          | 0.74 | 57              | 0.24 | 5.4E-04 |
| PF08659     | KR domain                                             | 58  | 12          | 0.64 | 46              | 0.19 | 8.4E-04 |
| PF05699     | hAT family dimerisation domain                        | 76  | 12          | 0.64 | 64              | 0.27 | 8.7E-03 |
| PF01357     | Pollen allergen                                       | 68  | 11          | 0.58 | 57              | 0.24 | 9.8E-03 |
| PF04195     | * Putative gypsy type transposon                      | 10  | 10          | 0.53 | 0               | 0.00 | 4.2E-12 |
| PF06839     | GRF zinc finger                                       | 25  | 10          | 0.53 | 15              | 0.06 | 4.9E-06 |
| PF03936     | Terpene synthase family, metal binding domain         | 27  | 10          | 0.53 | 17              | 0.07 | 1.1E-05 |
| PF08100     | Dimerisation domain                                   | 29  | 10          | 0.53 | 19              | 0.08 | 2.3E-05 |
| PF08246     | Cathepsin propeptide inhibitor domain (I29)           | 38  | 10          | 0.53 | 28              | 0.12 | 3.0E-04 |
| PF08787     | Alginate lyase                                        | 11  | 9           | 0.48 | 2               | 0.01 | 2.8E-09 |
| PF00079     | Serpin (serine protease inhibitor)                    | 15  | 9           | 0.48 | 6               | 0.03 | 1.9E-07 |
| PF00112     | Papain family cysteine protease                       | 38  | 9           | 0.48 | 29              | 0.12 | 1.3E-03 |

|         |                                                      |      |    |      |      |      |         |
|---------|------------------------------------------------------|------|----|------|------|------|---------|
| PF01609 | * Transposase DDE domain                             | 11   | 8  | 0.42 | 3    | 0.01 | 1.1E-07 |
| PF00092 | von Willebrand factor type A domain                  | 21   | 8  | 0.42 | 13   | 0.05 | 6.8E-05 |
| PF01598 | NA                                                   | 21   | 8  | 0.42 | 13   | 0.05 | 6.8E-05 |
| PF01397 | Terpene synthase, N-terminal domain                  | 24   | 8  | 0.42 | 16   | 0.07 | 2.0E-04 |
| PF07762 | Protein of unknown function (DUF1618)                | 41   | 8  | 0.42 | 33   | 0.14 | 8.6E-03 |
| PF02466 | Tim17/Tim22/Tim23 family                             | 19   | 7  | 0.37 | 12   | 0.05 | 2.5E-04 |
| PF00665 | * Integrase core domain                              | 30   | 7  | 0.37 | 23   | 0.10 | 5.0E-03 |
| PF00314 | Thaumatin family                                     | 32   | 7  | 0.37 | 25   | 0.10 | 7.3E-03 |
| PF01612 | 3'-5' exonuclease                                    | 20   | 6  | 0.32 | 14   | 0.06 | 2.4E-03 |
| PF01485 | IBR domain                                           | 22   | 6  | 0.32 | 16   | 0.07 | 4.0E-03 |
| PF00264 | Common central domain of tyrosinase                  | 8    | 5  | 0.26 | 3    | 0.01 | 9.6E-05 |
| PF09265 | Cytokinin dehydrogenase 1, FAD and cytokinin binding | 10   | 5  | 0.26 | 5    | 0.02 | 3.8E-04 |
| PF03181 | BURP domain                                          | 11   | 5  | 0.26 | 6    | 0.03 | 6.5E-04 |
| PF05241 | Emopamil binding protein                             | 6    | 4  | 0.21 | 2    | 0.01 | 3.8E-04 |
| PF00187 | Chitin recognition protein                           | 8    | 4  | 0.21 | 4    | 0.02 | 1.6E-03 |
| PF03405 | Fatty acid desaturase                                | 10   | 4  | 0.21 | 6    | 0.03 | 4.2E-03 |
| PF03061 | Thioesterase superfamily                             | 12   | 4  | 0.21 | 8    | 0.03 | 8.7E-03 |
| PF00182 | Chitinase class I                                    | 12   | 4  | 0.21 | 8    | 0.03 | 8.7E-03 |
| PF05129 | Transcription elongation factor Elf1 like            | 4    | 3  | 0.16 | 1    | 0.00 | 1.5E-03 |
| PF01255 | Putative undecaprenyl diphosphate synthase           | 5    | 3  | 0.16 | 2    | 0.01 | 3.5E-03 |
| PF00304 | Gamma-thionin family                                 | 6    | 3  | 0.16 | 3    | 0.01 | 6.6E-03 |
| PF00069 | Protein kinase domain                                | 1052 | 46 | 2.44 | 1006 | 4.19 | 4.7E-05 |
| PF07714 | Protein tyrosine kinase                              | 596  | 19 | 1.01 | 577  | 2.41 | 1.2E-05 |
| PF08263 | Leucine rich repeat N-terminal domain                | 248  | 6  | 0.32 | 242  | 1.01 | 6.8E-04 |
| PF01535 | PPR repeat                                           | 433  | 6  | 0.32 | 427  | 1.78 | 1.2E-08 |
| PF00149 | Calcineurin-like phosphoesterase                     | 64   | 0  | 0.00 | 64   | 0.27 | 7.8E-03 |
| PF02985 | HEAT repeat                                          | 65   | 0  | 0.00 | 65   | 0.27 | 7.2E-03 |
| PF00612 | IQ calmodulin-binding motif                          | 66   | 0  | 0.00 | 66   | 0.28 | 6.7E-03 |
| PF08241 | Methyltransferase domain                             | 67   | 0  | 0.00 | 67   | 0.28 | 6.2E-03 |
| PF03106 | WRKY DNA -binding domain                             | 68   | 0  | 0.00 | 68   | 0.28 | 5.7E-03 |
| PF00168 | C2 domain                                            | 74   | 0  | 0.00 | 74   | 0.31 | 3.6E-03 |
| PF00702 | haloacid dehalogenase-like hydrolase                 | 76   | 0  | 0.00 | 76   | 0.32 | 3.1E-03 |
| PF00270 | DEAD/DEAH box helicase                               | 77   | 0  | 0.00 | 77   | 0.32 | 2.9E-03 |
| PF07719 | Tetratricopeptide repeat                             | 95   | 0  | 0.00 | 95   | 0.40 | 7.4E-04 |
| PF00515 | Tetratricopeptide repeat                             | 97   | 0  | 0.00 | 97   | 0.40 | 6.3E-04 |
| PF00226 | DnaJ domain                                          | 101  | 0  | 0.00 | 101  | 0.42 | 4.7E-04 |
| PF00271 | Helicase conserved C-terminal domain                 | 124  | 0  | 0.00 | 124  | 0.52 | 8.1E-05 |
| PF00005 | ABC transporter                                      | 128  | 0  | 0.00 | 128  | 0.53 | 6.0E-05 |
| PF00400 | WD domain, G-beta repeat                             | 182  | 0  | 0.00 | 182  | 0.76 | 9.8E-07 |

## S5. Gene structure and comparison with rice

The distribution of coding exon lengths is peaked at 80 bp, with median coding exon length 140 bp. The distribution of coding exon lengths is essentially the same between rice and sorghum (Figure S6). The percent identity between rice and sorghum coding sequences is peaked at 85% and the distribution trails off at 75% (Figure S6).

**Figure S6. Coding exon length distributions for sorghum (red) and rice (green)**

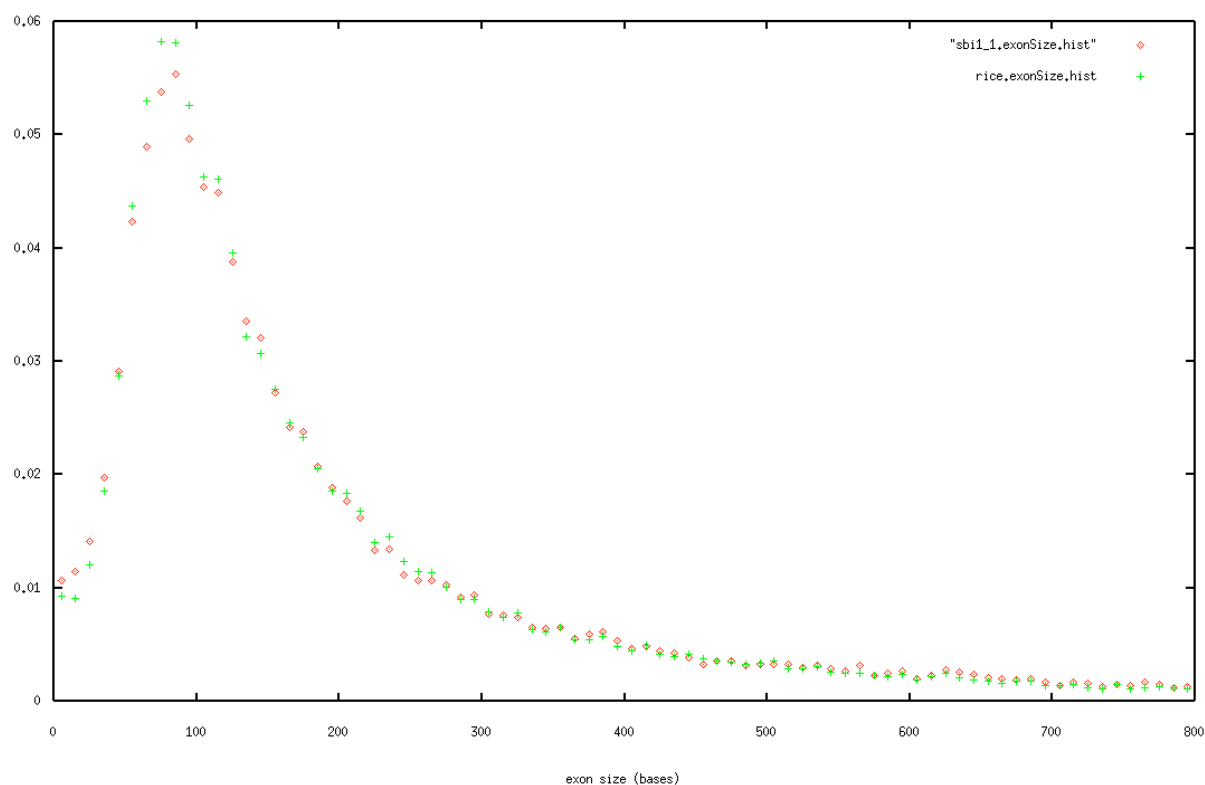

**Table S20: Statistics of sorghum gene composition.**

| Features                             | OS (Rap2)     | ZM*          | SB (1.3)                      |
|--------------------------------------|---------------|--------------|-------------------------------|
| Size                                 | 372,089,805.0 | 14,380,000.0 | 738,540,932.0                 |
| Chromosome assemblies<br>unassembled |               |              | 659,229,367.0<br>79,311,565.0 |
| # genes                              | 29,389.0      | 330.0        | 27,458.0                      |
| # exons                              |               | 1,520.0      | 129,411.0                     |
| average # of exons per gene          |               | 4.6          | 4.7                           |
| average exon size [bp]               |               | 259.0        | 268.0                         |
| median exon size [bp]                |               |              | 139.0                         |
| average intron size [bp]             | 440.0         | 607.0        | 436.0                         |
| median intron size [bp]              | 161.0         |              | 144.0                         |

|                                      |         |      |         |
|--------------------------------------|---------|------|---------|
| average gene size [bp] with UTR      | 3,340.0 |      |         |
| median gene size [bp] with UTR       | 2,734.0 |      |         |
| average gene size [bp] (without UTR) |         |      | 2,873.0 |
| median gene size [bp] (without UTR)  |         |      | 2,116.0 |
| Average gene density (kb per gene)   | 12.7    | 43.6 | 24.0    |

#### 100 random BACs\*

**Figure S7. Nucleotide identity between sorghum transcripts and sugarcane (blue), maize (green), and rice (red) (based on assembled ESTs)**

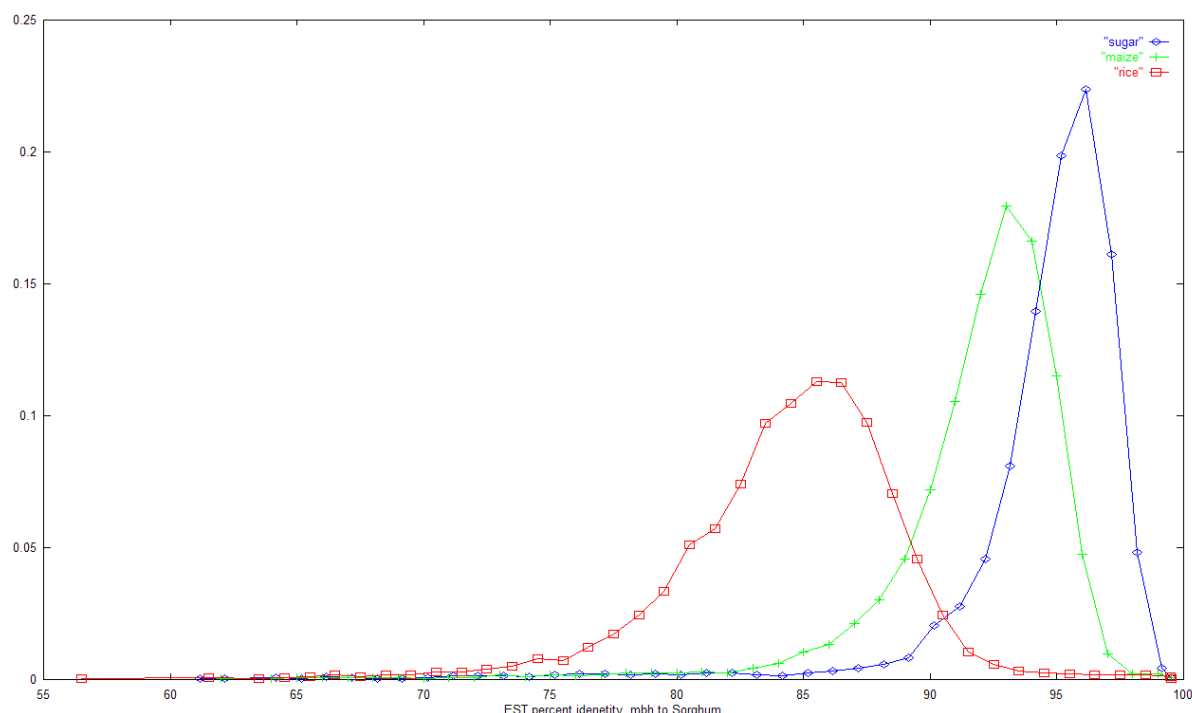

#### S5.4 CISP identification.

For identification of conserved intron-scanning primers, TIGR rice cDNA models (66,710; version 5) were downloaded ([ftp://ftp.tigr.org/pub/data/Eukaryotic\\_Projects/o\\_sativa/annotation\\_dbs/pseudomolecules/version\\_5.0/all.chrs/](ftp://ftp.tigr.org/pub/data/Eukaryotic_Projects/o_sativa/annotation_dbs/pseudomolecules/version_5.0/all.chrs/)) and sorghum contigs (3,294 super; 10 chromosomes) were aligned to rice cDNA using NCBI BLAST 2.2.13 with an e-value cutoff of  $1e-50$ . This resulted in 76,327 hits. Of these alignments, 6,760 unique rice cDNAs hit the sorghum genome that had at least one pair of exons with perfectly conserved HSP fragments that were at least 20bp in length and no more than 2000bp apart. A total of 3,694 of these genes had a single exon pair. These exon pairs were extracted from the BLAST report with `cisp_extractor.pl` (v1.2; F. A. Feltus, author), and provided in Supplementary List #2.

## S6. Identification and characterization of segments of conserved synteny.

Comparative dot plots used ColinearScan<sup>4</sup> and multi-alignments used MCScan<sup>5</sup>, applied to rice annotation project (RAP) data version 2 (mapped representative models, 29389 loci) and *Sorghum bicolor* sbi1.4 annotation set (34496 loci). We then did pairwise BLASTP ( $E < 1e-5$ , top five hits), both within each genome and between the two genomes to retrieve potential anchors. *Zea* BAC sequences and FPC contig coordinates on a virtual *Zea* genome were downloaded from the Maize Genome Browser (<http://www.maizesequence.org>, release Jan. 7, 2008). *Sorghum* coding sequences were then searched against *Zea* BACs for potential orthologous *Zea* genes using translated BLAT<sup>6</sup> with minimum score 100.

**Figure S8. Global dot-plot of *Oryza* - *Sorghum* and *Sorghum* – *Sorghum* genome alignments.** Global dot-plot between *Oryza* and *Sorghum* and within *Sorghum*. Scales are gene indices on the chromosomes. We did not use basepair scales since most synteny lie within relatively compact recombinogenic regions. For each graph, x-axis is the query, y-axis is the database for BLASTP and top two hits were plotted. Black dots are best hits, red dots are second best hits.



Rice

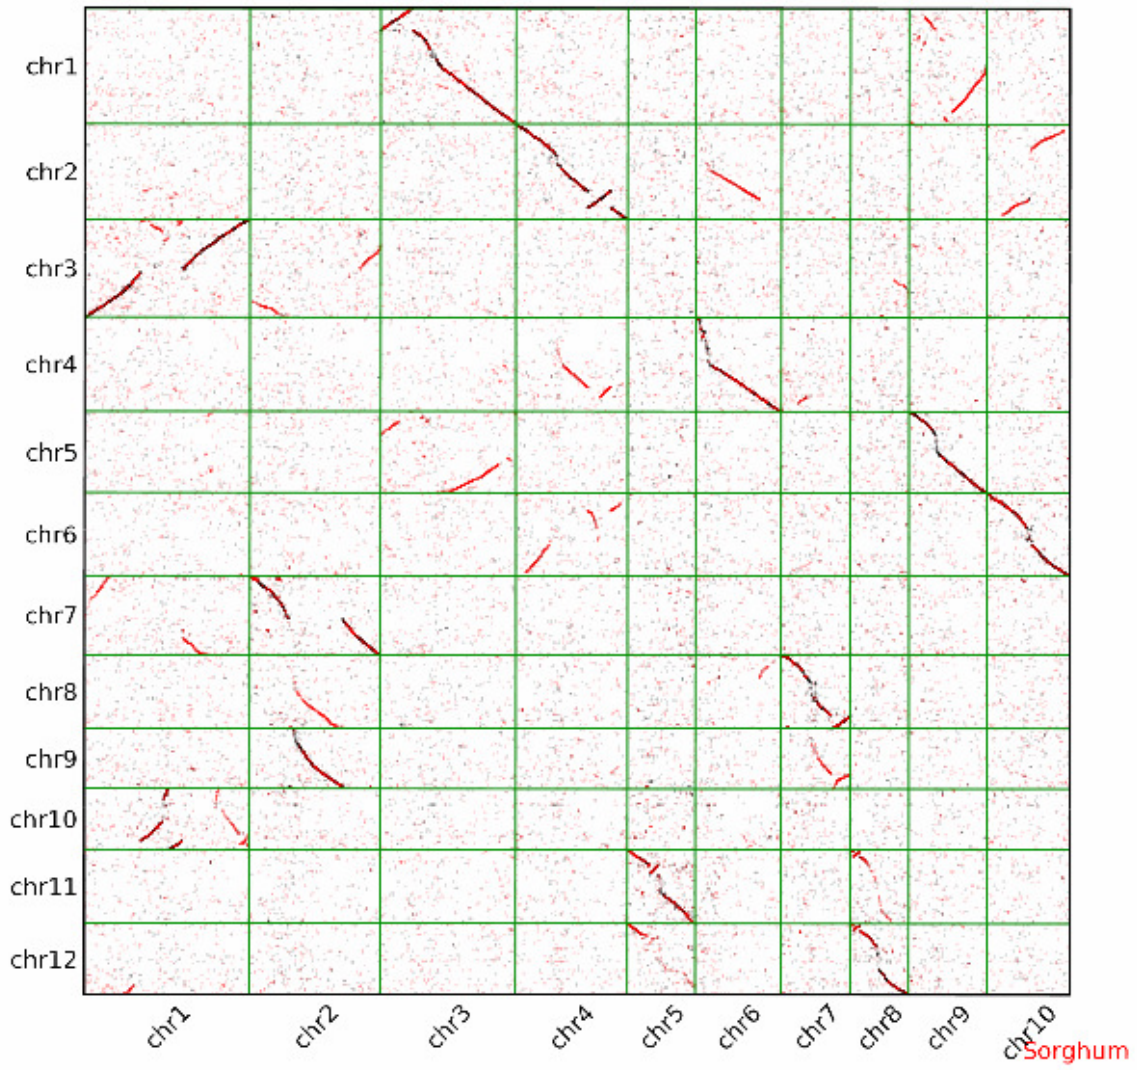

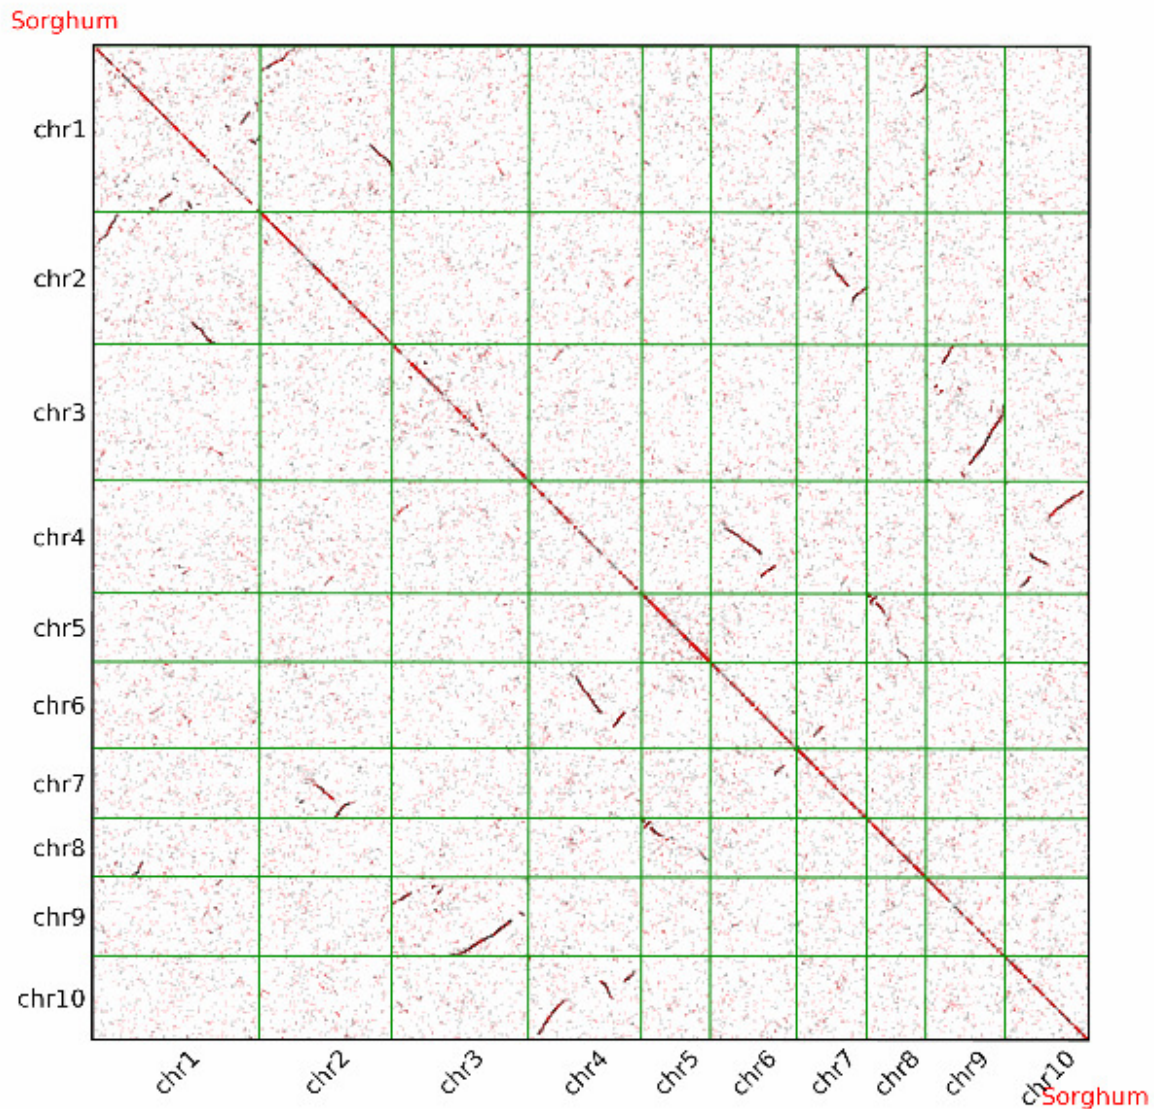

### S6.1 Pfam domains enriched in singleton or syntenic duplicated genes of sorghum.

We have previously detailed non-random patterns in the retention or loss of gene following the ancient genome duplication shared by rice and sorghum, based on the rice sequence. Analysis of the sorghum sequence using the methods described<sup>38</sup> largely corroborates earlier findings, with all duplication-enriched rice gene families also duplication-enriched in sorghum, and most singleton-enriched gene families also singleton-enriched in sorghum (although in a few cases, sorghum has too few such genes for the observation to be statistically significant). A total of 2 novel duplication-resistant gene families and 10 novel singleton-enriched gene families were found in



sorghum, based on the stringent (0.001) statistical criteria that we have applied previously, and are listed below.

| pfam    | Number of Syntenic duplicates | Number of singletons | Deviation from random | Sorghum class      |
|---------|-------------------------------|----------------------|-----------------------|--------------------|
| PF07714 | 207                           | 2                    | 2.9E-12               | duplicate enriched |
| PF08263 | 80                            | 2                    | 5.3E-05               | duplicate enriched |
| PF02985 | 7                             | 16                   | 5.1E-09               | singleton enriched |
| PF00098 | 4                             | 10                   | 2.2E-06               | singleton enriched |
| PF08242 | 4                             | 9                    | 1.3E-05               | singleton enriched |
| PF00288 | 2                             | 7                    | 2.0E-05               | singleton enriched |
| PF08544 | 2                             | 6                    | 1.3E-04               | singleton enriched |
| PF01494 |                               | 4                    | 4.3E-04               | singleton enriched |
| PF01979 |                               | 4                    | 4.3E-04               | singleton enriched |
| PF03810 |                               | 4                    | 4.3E-04               | singleton enriched |
| PF06747 |                               | 4                    | 4.3 E-04              | singleton enriched |
| PF00300 | 1                             | 4                    | 9.6E-04               | singleton enriched |

### Supplemental Note 7. Timing and characterization of grass-specific genome duplication.

Counting transversions at four-fold synonymous sites, and correcting for multiple transversions (averaging over the long syntenic blocks to get good signal) we find:

Sorghum genome duplication:  $4DTv\text{-obs}=0.315 \Rightarrow 4DTv\text{-corr}=0.497$   
 Rice genome duplication:  $4DTv\text{-obs}=0.28 \Rightarrow 4DTv\text{-corr}=0.411$   
 Sorghum-rice divergence:  $4DTv\text{-obs}=0.24 \Rightarrow 4DTv\text{-corr}=0.327$

Clearly the genome duplication is more ancient than the speciation, consistent with it being shared<sup>20</sup>. However, interestingly, sorghum appears to be acquiring more substitutions/site than rice since the duplication ( $0.315 > 0.28$ ).

We can use these three (corrected for multiple hits) numbers and computed branch lengths on a tree allowing for independent rates of evolution, with  
 a = rice-sorghum progenitor transversions/site prior to speciation but after duplication.  
 b = rice transversions/site since rice-sorghum speciation.  
 c = sorghum transversions/site since rice-sorghum speciation.

These numbers work out to be:  
 a = 0.064 transversions/site.  
 b = 0.142 transversions/site.  
 c = 0.185 transversions/site.

If we average the rice and sorghum rates  $(b+c)/2 \sim 0.163$ , and use a (fossil-based)

estimate for that speciation at 50 million years, then the time from the duplication to the speciation is  $\sim(0.064/0.163)^*50 \text{ My} \sim 20 \text{ My}$  which is in keeping with the often-quoted "70 Mya" date<sup>20</sup> for the duplication.

### Supplemental Note 8. DNA alignments

We used the VISTA pipeline infrastructure<sup>39</sup> for the construction of genome-wide pairwise DNA alignments between *Sorghum*, the assembly of the Rice v.5.0 genome and 9527 Maize BACs from Genbank (retrieved on June 1, 2007; total length - 1.55Gbp). To align genomes we have implemented algorithms that used an efficient combination of global and local alignment methods. First, we obtained a map of large blocks of conserved synteny between the two species by applying Shuffle-LAGAN global chaining algorithm<sup>40</sup> to local alignments produced by translated BLAT<sup>16</sup>. After that we used Supermap, the fully symmetric whole-genome extension to the Shuffle-LAGAN. Then, in each syntenic block we applied Shuffle-LAGAN a second time to obtain a more fine-grained map of small-scale rearrangements such as inversions.

Coverage of different functional intervals of the sorghum genomes by alignment (Table S21) was calculated using the technique first applied to the human-mouse comparison<sup>41</sup>). Both sorghum-rice and sorghum-maize alignments demonstrate high level of DNA conservation between species. 39.9% of all aligned to rice sorghum sequence are conserved at the 70%/100bp level (65% for the maize alignment). A total of 77.5% of the length of sorghum exons are covered by the alignment with rice and 87.3% of base pairs in these exon alignments belong to intervals with a high level of conservation (above 70%/100 bp). These numbers for the maize alignment are equal 63.3 and 92% accordingly. Aligned non-coding regions of sorghum contain about 12% of highly conserved with rice intervals, and this percentage is especially high for the alignment with maize – 56%. These intervals can be either under predicted by current techniques coding regions, or other functional elements.

**Table S21: Coverage of different intervals of the sorghum genome by the alignments with the rice v.5.0 genome and 1.55Gbp of Maize BACs.**

|                   | Rice   | Maize  |
|-------------------|--------|--------|
| Total coverage:   | 11.3%  | 13.52% |
| utr coverage:     | 52.7%  | 60.31% |
| exons coverage:   | 77.54% | 63.26% |
| up100 coverage:   | 38.05% | 43.93% |
| up200 coverage:   | 33.41% | 40.31% |
| up500 coverage:   | 25.03% | 32.2%  |
| down200 coverage: | 28.14% | 37.65% |

The constructed genome-wide pair-wise alignments can be downloaded from <http://pipeline.lbl.gov/downloads.shtml> and are accessible for browsing and various types of analysis through the VISTA browser at <http://pipeline.lbl.gov/> linked to the JGI *Sorghum* browser.

**Figure S9: Multiple VISTA conservation tracks among syntenic regions of plants.** Evolutionary relationships among these regions are shown (at right), with black circles representing the pan-cereal duplication ( $\rho$ ) and a maize-specific duplication ( $m$ ). The region from sorghum chromosome 6: 56.17-56.45Mb is used as the ‘reference’ (shown at top) in the VISTA pipeline<sup>49</sup>. By aligning syntenic regions to sorghum, cases of sub-functionalization in maize can be more easily identified (two are shown).

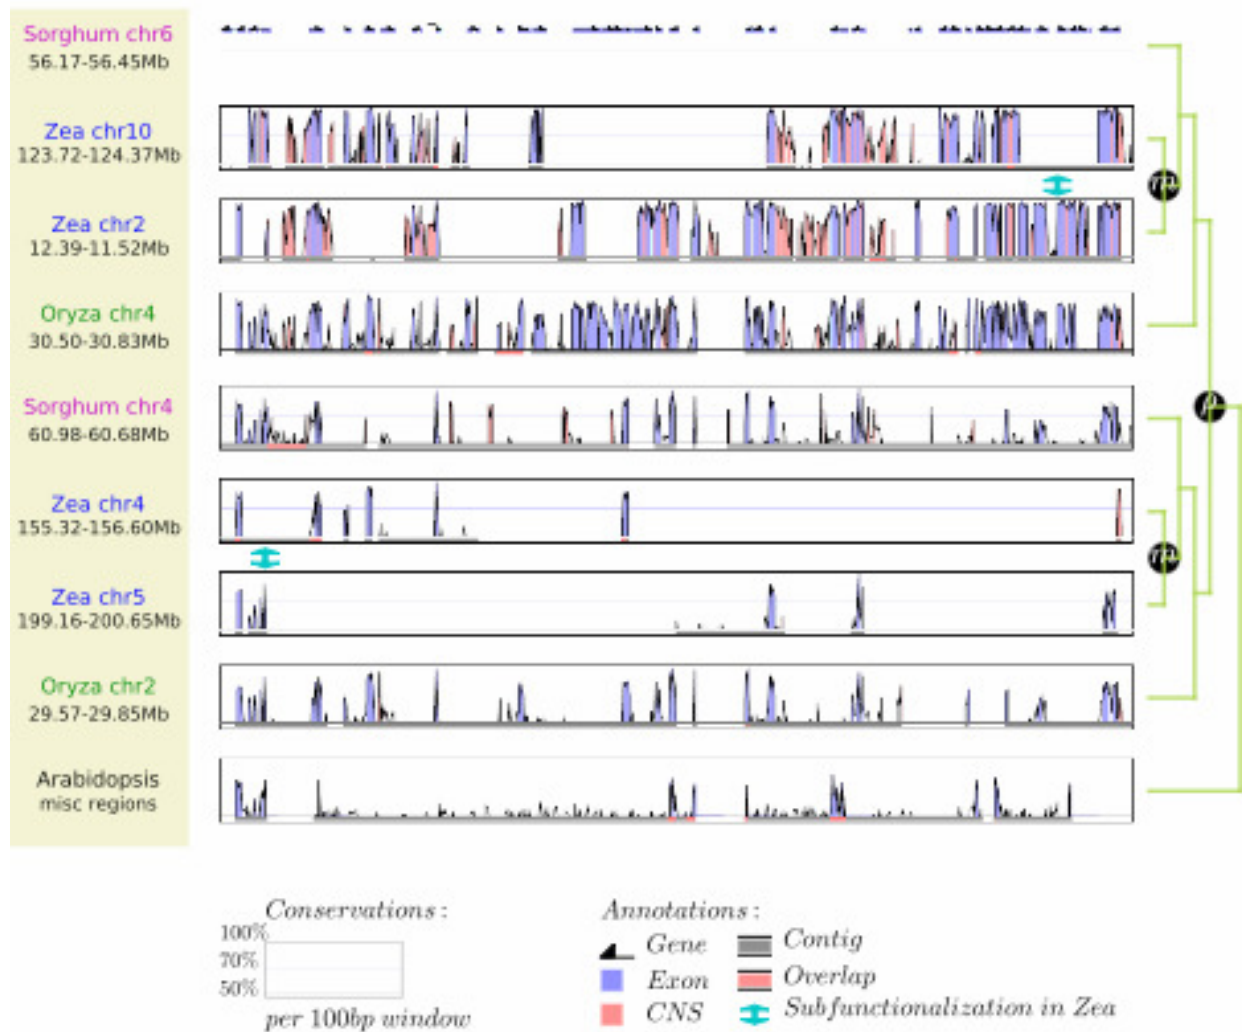

**Figure S10: Grass conserved noncoding sequences (CNSs) are often far removed from the genes with which they associate.** CNSs are depicted as color-coded boxes—blastn high scoring pairs -- far upstream of a grass *WRKY* transcription factor gene. The rice gene *Os04G50920* (*Os*, upper panel) was used as query against orthologous subject gene regions: sorghum (*Sb*, second panel); *Brachypodium distachyon* (*Bd*, JGIv1, third panel); and the two homeologous maize BACs (*Zm1* and *Zm2*, AC208537 and 110; maizesequence.org). The exact pairs aligned are color-coded. Masked sequence is also color-coded; without the rice repeat-mask, transposons would obscure this graphic. The four exons are each encased in grey rectangles. Most nonexon hits to *Os* are syntenic, noncoding, and fit the criteria for plant CNSs<sup>50</sup>. Panel 1 plots all blast hits over the rice gene and 9.5 kb of 5' chromosome. Note how putative CNSs pile-up in the introns and upstream space. For example, ovals enclose two examples where all grass sequences except one maize gene share the same CNS, possibly indicating subfunctionalization following the maize tetraploidy. Lines connect the same CNSs; only a few are drawn to reduce clutter. These blastn hits are generally syntenic, although the *Zm1* BAC has a single “inversion” from the leftmost border to just inside exon 1, which flips the entire region (perhaps indicating BAC misassembly). CNSs that are ~7kb upstream in rice and sorghum are 30kb upstream in *Brachypodium* and even more distant in maize. The sorghum sequence may help to solve the mystery of why noncoding sequences are conserved even so far from exons. To regenerate this experiment and to change distances, algorithm, or settings click <http://tinyurl.com/6jk5dd>.

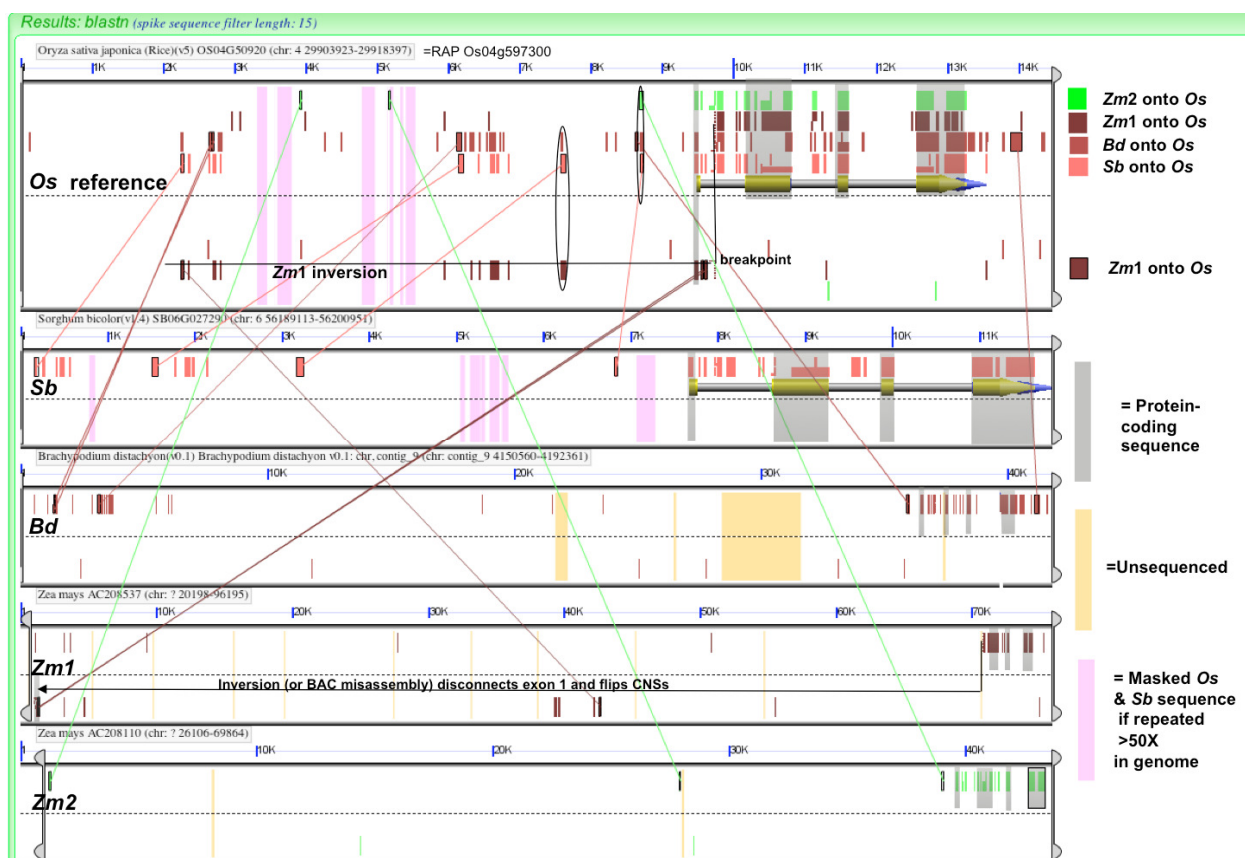

### Supplemental Note 9. Evolution of C<sub>4</sub> photosynthesis genes

We identified 7 C<sub>4</sub> photosynthesis enzyme genes in the sorghum genome, including 1 phosphoenolpyruvate carboxylase gene (pepc), 1 phosphoenolpyruvate carboxylase kinase gene (ppck), 1 pyruvate orthophosphate dikinase gene (ppdk), 2 carbonic anhydrase genes (cah), 1 malate dehydrogenase gene (mdh), and 1 malic enzyme gene (me).

Known photosynthesis genes in sorghum and maize (Table S22a) were downloaded from the NCBI CoreNucleotide database (<http://www.ncbi.nlm.nih.gov/>). By searching these known genes against sorghum and rice gene models by running BLAST and by constructing gene trees, the sorghum C<sub>4</sub> genes and their isoforms were identified. Neighbor-joining topologies (Figure S9) were generated as the consensus of 100 bootstrap alignment replicates by running MEGA<sup>42</sup>. By searching for gene colinearity in duplicated regions in rice and sorghum genomes using MCSCAN<sup>43</sup>, we identified those rice-sorghum orthologs that had preserved gene colinearity (Figure S9).

The C<sub>4</sub> pepc gene Sb10g021330.1 shares ~99% amino acid similarity to the one previously identified copy in Sorghum bicolor (GenBank accession no: X17379), and ~93% to the maize C<sub>4</sub> gene (NM\_00111948)<sup>44</sup>. The corresponding rice ortholog has been lost (Table S22b). Sb10g021330.1 is suggested to be the C<sub>4</sub> enzyme gene in that it shares 98.5% sequence identity with cDNA clone HHU2, for which transcripts accumulated more than 20 times higher in mesophyll than in bundle-sheath cells<sup>45</sup>

The likely Sorghum C<sub>4</sub> ppck gene Sb04g036570, sharing 99.8% similarity to GenBank item DQ386731, is grouped together with the maize C<sub>4</sub> ppck gene (NM\_001112338)<sup>46</sup> sharing ~93% amino acid identity.

The Sorghum C<sub>4</sub> ppdk gene Sb09g019930 shares ~93% amino acid identity with its maize ortholog (NM\_001112268). They share a single rice ortholog Os05g0405000. Sb09g019930 is suggested to be the C<sub>4</sub> enzyme gene in that it shares ~95% sequence identity with cDNA clone HHU1, for which transcripts accumulated more than 10-20 times higher in mesophyll than in bundle-sheath cells<sup>45</sup>.

There are two sorghum mdh genes, Sb07g023910 (GenBank accession no: S55884) and Sb07g023920 (X53453), which are in tandem locations. However, a previous report indicated that only the latter is light induced, being possibly involved in the C<sub>4</sub> pathway<sup>47</sup>. They share a single maize C<sub>4</sub> ortholog (X16084) and single non-C<sub>4</sub> rice ortholog (Os08g0562100).

The likely sorghum C<sub>4</sub> me gene Sb03g003230 (AY274836) shares ~95% amino acid identity with a maize C<sub>4</sub> gene (NM\_00111843)<sup>48</sup>. There is a tandem me gene copy in sorghum (Sb03g003220), which was likely produced before sorghum-maize divergence (Figure S9). Sb03g003230 is inferred to be involved in C<sub>4</sub> pathway based on its 100% identity to cDNA clone HHU3, for which transcripts accumulated in bundle-sheath cells 20 times more than those in mesophyll cells<sup>45</sup>. Comparatively, Sb03g003220 has 95% identity to HHU3, and matches no other cDNA isolated.



There are two types of cah genes: alpha and beta types, with the two gene types sharing relatively low sequence similarity. The C4 cah genes Sb03g029170 and Sb03g029180 are beta-type, and were identified based on their similarity to previously reported clones 45. Clone HHU69 is ~100% identical to the terminal region of Sb03g029170 and HHU68 ~99% identical to the terminal region of Sb03g029180. Both clones are transcribed in mesophyll cells only, suggesting that they are probably from C4 pathway genes. These clones share relatively lower similarity with the other tandem gene sequences. Alpha-type cah genes include Sb07g022860, Sb07g022880, Sb07g022890, Sb07g022910, Sb10g023940, Sb05g003270, Sb06g015600.

**Table S22a. Possible C4 genes identified in the sorghum genome**

| Gene type                              | GENE ID     | CDSLEN | Related Accession | Maize ortholog             |
|----------------------------------------|-------------|--------|-------------------|----------------------------|
| carbonic anhydrase                     | Sb03g029170 | 1371   |                   | NM_001111889               |
| carbonic anhydrase                     | Sb03g029180 | 615    |                   | NM_001111889               |
| malate dehydrogenase                   | Sb07g023920 | 1290   | X53453            | X16084                     |
| malic enzyme                           | Sb03g003230 | 1941   | AY274836          | NM_001111843, NM_001111913 |
| phosphoenolpyruvate carboxylase        | Sb10g021330 | 2886   | X17379            | NM_001111948               |
| phosphoenolpyruvate carboxylase kinase | Sb04g036570 | 855    | DQ386731          | NM_001112338               |
| pyruvate orthophosphate dikinase       | Sb09g019930 | 2847   |                   | NM_001112268               |

**Table S22b. Sorghum C4 genes , their isoforms, and their corresponding rice orthologs<sup>1</sup>. C4 genes are underlined**

| C4 genes and isoforms           | Rice gene 1  | Sorghum gene 1                                                              | Rice gene 2               | Sorghum gene 2                             |
|---------------------------------|--------------|-----------------------------------------------------------------------------|---------------------------|--------------------------------------------|
| carbonic anhydrase              | Os01g0639900 | <u>Sb03g029170</u> ,<br><u>Sb03g029180</u> ,<br>Sb03g029190,<br>Sb03g029200 | N.A.                      | N.A.                                       |
| malate dehydrogenase            | Os08g0562100 | N.A.                                                                        | N.A.                      | <u>Sb07g023910</u> ,<br><u>Sb07g023920</u> |
| malic enzyme                    | Os01g0188400 | <u>Sb03g003220</u> ,<br><u>Sb03g003230</u>                                  | Os05g0186300              | Sb09g005810                                |
| malic enzyme                    | Os01g0723400 | Sb03g033250                                                                 | N.A.                      | N.A.                                       |
| malic enzyme                    | Os01g0743500 | Sb03g034280                                                                 | N.A.                      | N.A.                                       |
| malic enzyme                    | N.A.         | Sb01g017790                                                                 | Os10g0503500              | N.A.                                       |
| phosphoenolpyruvate carboxylase | Os01g0110700 | Sb03g008410                                                                 | N.A.                      | N.A.                                       |
| phosphoenolpyruvate carboxylase | Os01g0758300 | Sb03g035090                                                                 | N.A.                      | N.A.                                       |
| phosphoenolpyruvate carboxylase | Os02g0244700 | Sb04g008720                                                                 | N.A.                      | <u>Sb10g021330</u>                         |
| phosphoenolpyruvate carboxylase | Os08g0366000 | N.A.                                                                        | N.A.                      | Sb07g014960                                |
| phosphoenolpyruvate carboxylase | N.A.         | Sb02g021090                                                                 | Os09g0315700 <sup>2</sup> | N.A.                                       |
| phosphoenolpyruvate             | Os02g0625300 | Sb04g026490                                                                 | Os04g0517500              | Sb06g022690                                |

|                                           |              |                    |              |                    |
|-------------------------------------------|--------------|--------------------|--------------|--------------------|
| carboxylase kinase                        |              |                    |              |                    |
| phosphoenolpyruvate<br>carboxylase kinase | Os02g0807000 | <u>Sb04g036570</u> | N.A.         | N.A.               |
| pyruvate orthophosphate<br>dikinase       | N.A.         | N.A.               | Os05g0405000 | <u>Sb09g019930</u> |

<sup>1</sup>According to gene colinearity, gene1 and gene 2 are paleologs produced by whole genome duplication in the common ancestral genome of rice and sorghum. Rice gene 1 is orthologous to sorghum gene 1 and rice gene 2 is orthologous to sorghum gene2. "N.A." indicates that the anticipated homologous gene is not found at the colinear location, implying possible gene loss or translocation. 2. Os09g0315700 has only partial coding sequence of the other homologs, indicating a possibility that it is a pseudo-gene. Therefore, it was not involved in gene tree construction.

**Figure S11:** Phylogeny of photosynthesis enzyme genes and their isoforms in sorghum, rice and maize. (a) *pepc*; (b) *ppck*; (c) *ppdk*; (d) *cah*; (e) *mdh*; (f) *me*. In the gene ids, "Sb" indicates *Sorghum bicolor* genes, "Sv" indicates *Sorghum vulgare* genes, "Os" indicates *Oryza sativa* genes and "Zm" indicates *Zea mays* genes. Neighbor-joining topologies were generated as the consensus of 100 bootstrap alignment replicates by running MEGA <sup>42</sup>.

(a). phosphoenolpyruvate carboxylase

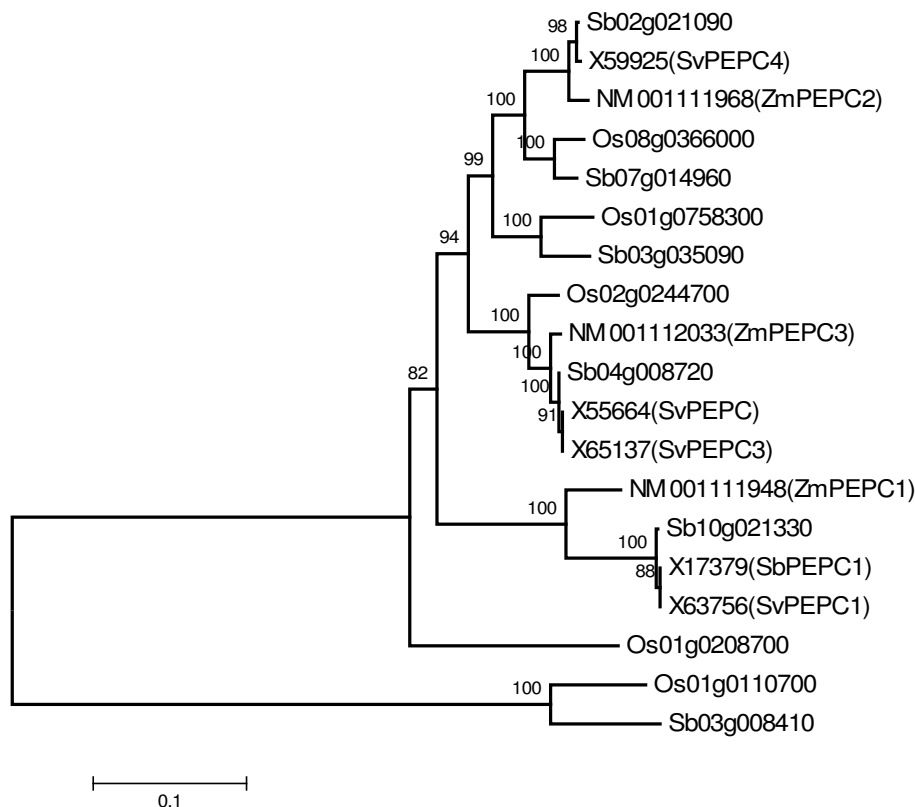

## (b). phosphoenolpyruvate carboxylase kinase

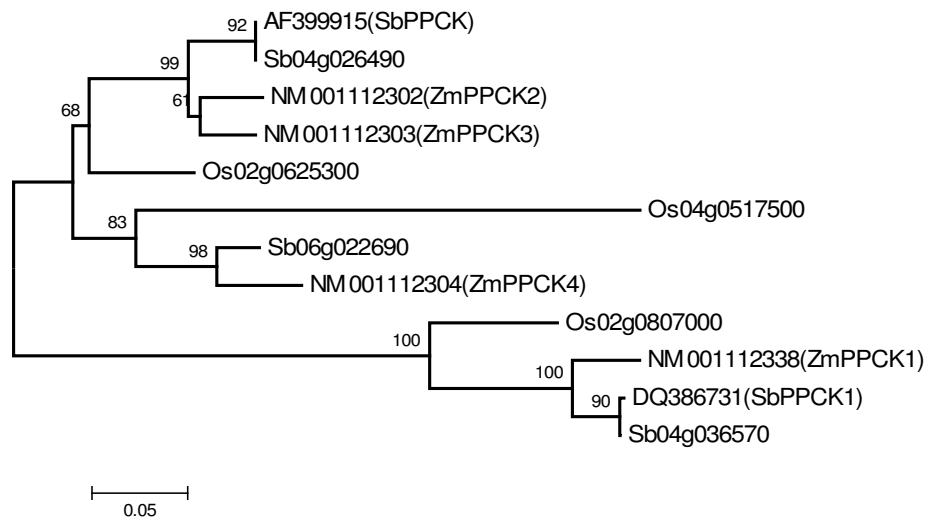

## (c). pyruvate orthophosphate dikinase

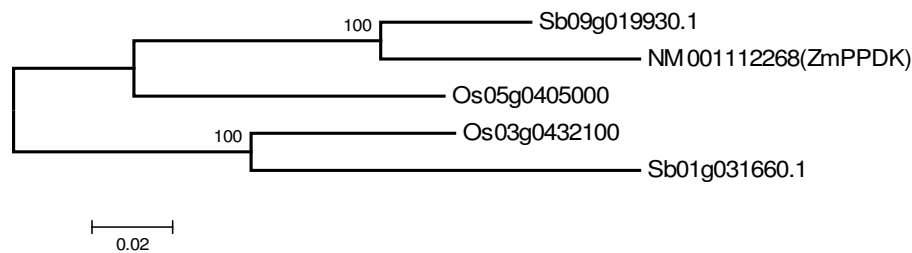

## (d). carbonic anhydrase

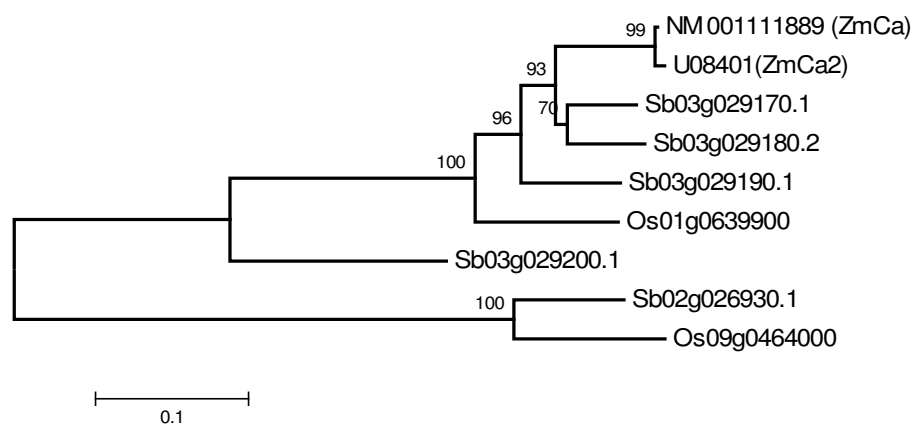



## (e). malate dehydrogenase

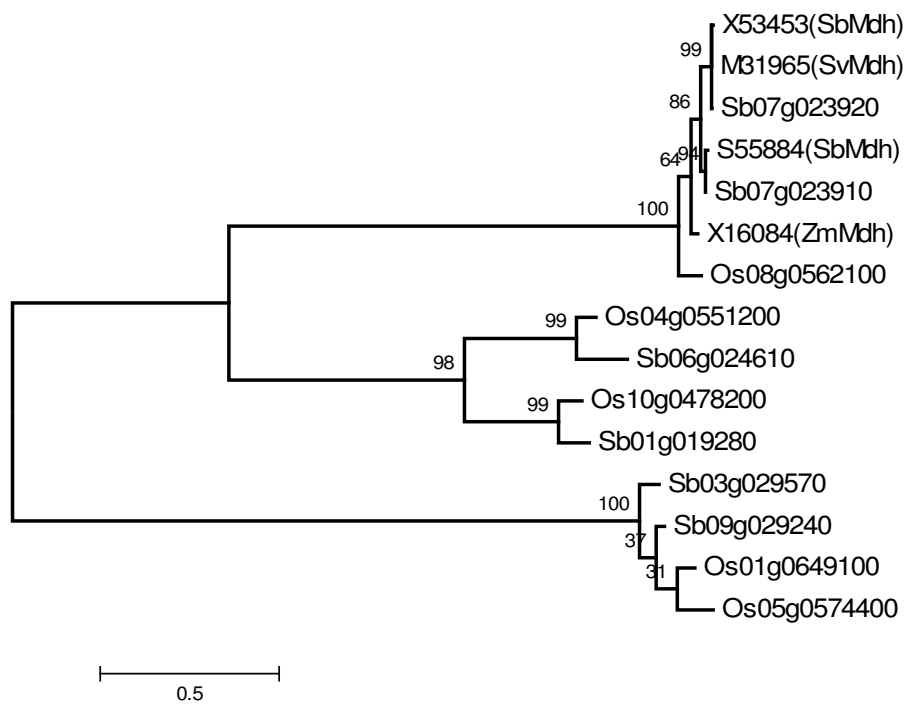

## (f). malic enzyme

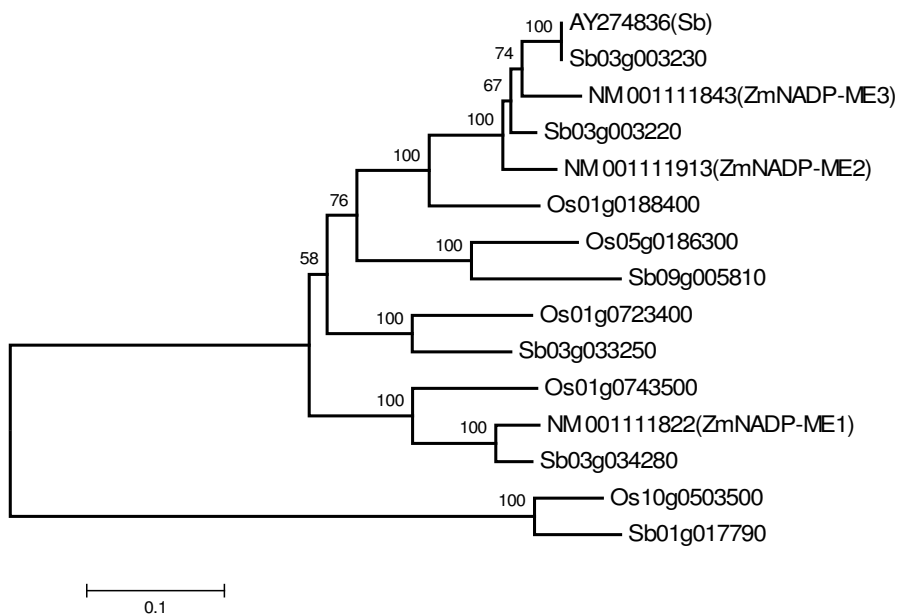

## Supplemental Note 10. Evolution of Cell wall synthesis genes

The Carbohydrate-Active Enzyme (CAZy) database (<http://www.cazy.org/>) contains 91 families of glycosyl transferases (GTs), 112 families of glycosyl hydrolases (GHs), and other carbohydrate-metabolizing enzymes<sup>35</sup>.

Sorghum cellulose synthase (CesA), cellulose synthase-like (Csl), and a glycosyl transferase, GT31 gene families were constructed by querying the sorghum peptide sequence database, *Sorghum bicolor* sbi1.4 annotation set (34,496 loci), with rice protein sequences from the Purdue cell wall genomics website, <http://cellwall.genomics.purdue.edu/>, and using NCBI's Basic Local Alignment and Search Tool<sup>1</sup>. A custom DOSshell script was used to direct the BLAST through multiple sequence files using the following parameters: protein-protein BLAST search (BLASTp), expect value of  $10^{-20}$ , and no alignment output. The BLAST results were parsed using a custom C++ script to scan and place the queried rice gene name, associated sorghum gene names, and match score values for any score >200 into a file for later sorting in Microsoft Excel. Duplicate matches due to multiple hits to the same sorghum sequence from closely related rice sequences were eliminated to generate a unique sorghum gene list to extract sorghum gene sequences from the database using the fastacmd program from NCBI<sup>1</sup> in a custom DOSshell script. Table S23 shows relative numbers of family members of *Arabidopsis*, rice, maize, and sorghum broken into families and group clades for Csl and GT31 and potential cell wall expression (primary, secondary, or other/unknown) for CesA.

Dendrograms were assembled from protein coding sequences using the neighbor joining method with ClustalW<sup>49</sup> through the Kyoto University Bioinformatics Center website (<http://align.genome.jp/>). The parameters used were for a slow, accurate tree with gap open penalty of 10, gap extension penalty of 0.05, and a Gonnet weight matrix for proteins for multiple alignments; a gap open penalty of 10, gap extension penalty of 0.1, and a Gonnet weight matrix for proteins for pairwise alignments. After the initial multiple alignment, individual clade alignments were checked using Multalin<sup>50</sup>. Matches to conserved regions within groups of family clades, were manually checked and non-matching members of the families removed to produce a final tree alignment in ClustalW. Dendrograms were drawn using TreeDyn (<http://www.treedyn.org/>)<sup>51</sup> and exported as JPEG files. Figure S10 shows the clade structure for the cellulose synthase superfamily, consisting of CesA and Csl sequences. Figure S11 shows the clade structure for family GT31.

**Table S23. Comparative numbers of cell-wall genes in families of *Arabidopsis*, rice, sorghum, and maize**

| Family # | Family name | Sub Family   | Number of genes    |           |           |           |
|----------|-------------|--------------|--------------------|-----------|-----------|-----------|
|          |             |              | <i>Arabidopsis</i> | Rice      | Sorghum   | Maize     |
| 2.1      | CesA        | Primary      | 3                  | 3         | 4         | 5         |
|          |             | Secondary    | 3                  | 3         | 3         | 3         |
|          |             | Other        | 4                  | 4         | 5         | 6         |
|          |             | <b>Total</b> | <b>10</b>          | <b>10</b> | <b>12</b> | <b>14</b> |
| 2.2      | CSL         | A            | 9                  | 11        | 8         | 9         |
|          |             | B            | 6                  | 0         | 0         | 0         |
|          |             | C            | 5                  | 6         | 5         | 11        |
|          |             | D            | 5                  | 5         | 5         | 10        |
|          |             | E            | 1                  | 3         | 5         | 4         |
|          |             | F            | 0                  | 8         | 10        | 11        |
|          |             | G            | 3                  | 0         | 0         | 0         |
|          |             | H            | 0                  | 3         | 3         | 1         |
|          |             | <b>Total</b> | <b>29</b>          | <b>36</b> | <b>36</b> | <b>46</b> |
| 2.3.5    | GT31        | A            | 12                 | 7         | 8         | 8         |
|          |             | B            | 6                  | 10        | 11        | 10        |
|          |             | C            | 8                  | 8         | 8         | 9         |
|          |             | D            | 3                  | 2         | 3         | 5         |
|          |             | E            | 3                  | 2         | 2         | 3         |
|          |             | F            | 1                  | 10        | 6         | 5         |
|          |             | <b>Total</b> | <b>33</b>          | <b>39</b> | <b>38</b> | <b>40</b> |

**Figure S12 (next page). Cellulose synthase superfamily dendrogram for *Arabidopsis*, rice and sorghum.** The figure demonstrates good conservation of genes for CesA and Csls between sorghum and rice, with two unique grass clades (CslF and CslH) and two unique *Arabidopsis* clades (CslB and CslG).

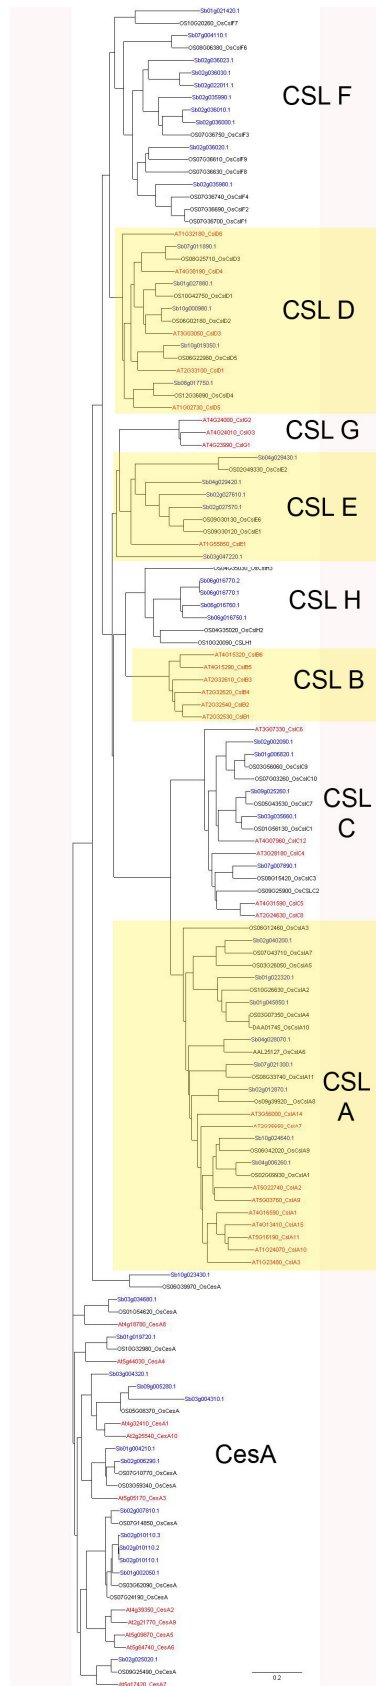

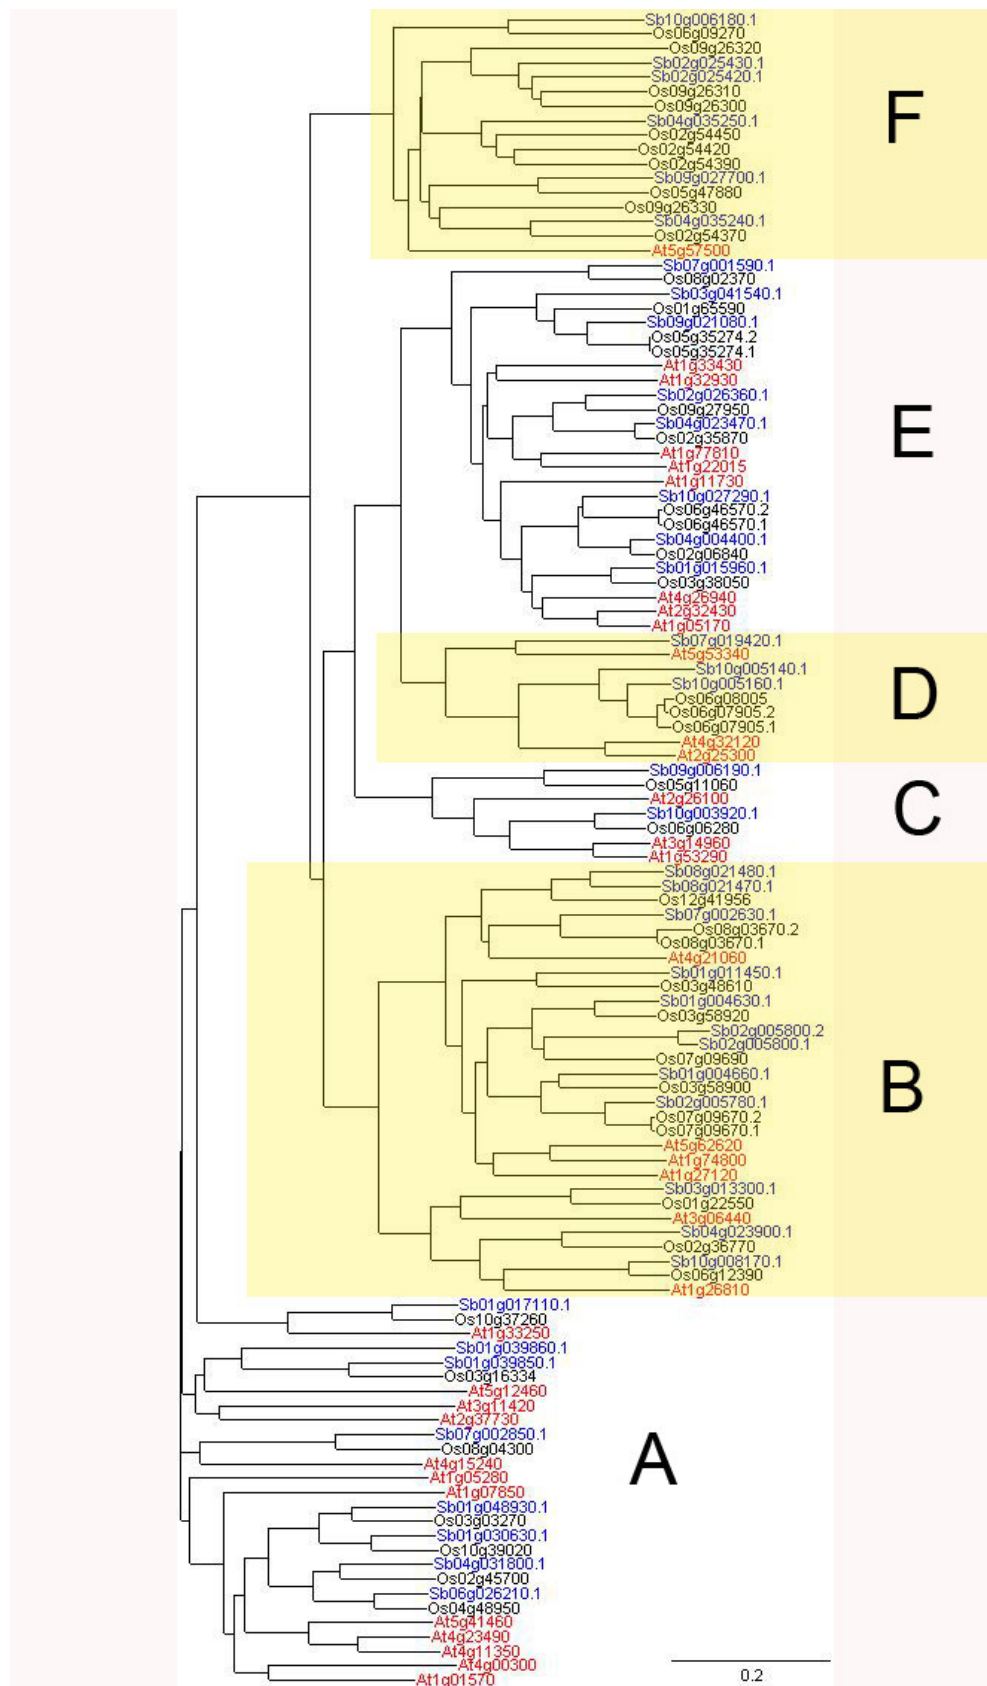

**Figure S13 (prior page). GT31 dendrogram for Arabidopsis, rice, and sorghum showing clade structure and conservation of genes in the family.**

The group F genes are greatly expanded in the grasses over Arabidopsis, suggesting possible unique function in grasses. Group A shows a slight reduction in grasses, whereas group B shows a slight expansion.

**Supplemental Note 11. Sorghum-sugarcane microcolinearity.**

Comparison of sorghum genome to genomic sequences of sugarcane (*Saccharum* spp.) provided insights into the evolutionary history of these closely related diploid and autopolyploid genomes. Twenty selected sugarcane bacterial artificial chromosomes (BACs) were selected for sequencing, two BACs each corresponding to the euchromatic region of individual sorghum chromosome, to study the sequence conservation and synteny. One unexpectedly short (25 kb) BAC was not included in the analysis. The assembled BAC contigs (Genbank #FJ348715-348733) were annotated using sugarcane and sorghum ESTs. A total of 1.45 Mb sugarcane BAC sequences were unambiguously ordered based on sorghum genome sequence, which accounted for 90% of the estimated 1.6 Mb target BAC sequences. Among the ordered sequences, 986 Kb (68%) collinearly aligned with sorghum sequence. The estimated time of divergence is about 7.7 million years, supporting their recent divergence.

Sugarcane has undergone at least two more rounds of genome-wide duplication to reach its current level of autopolyploidy after its separation with sorghum from a common ancestor. The continuous diploidization of sorghum and the process of polyploidization of sugarcane may result in different gene loss/retention rate. From the aligned sequences, 209 protein coding genes were found in sugarcane, including 155 validated by sugarcane ESTs, 28 by sorghum ESTs, and 26 corresponding to sorghum annotated genes. In homologous region of sorghum, 189 genes were annotated, including 121 validated by sorghum ESTs, 29 by sugarcane ESTs, and 39 from prediction of the most recent version of the annotated sorghum genome. Among these annotated genes, 19 appeared to be sugarcane specific while 12 might be sorghum specific. The larger number of genes from one homolog of the sugarcane genome indicated higher rate of gene loss diploid sorghum genome during its diploidization process. On the other hand, the higher gene retention rate in autopolyploid sugarcane appeared to be against the conventional wisdom of faster gene loss in polyploids because of the existence of a large number of allelic genes.

Among the 20 sequenced sugarcane BACs, 986 kb sequence aligned co-linearly to 1,189 kb sorghum sequence (Figure S7). Aligning homologous genes demonstrated that tandem duplication as a driving force of gene and genome evolution as documented in both sugarcane and sorghum genomes (Figure S13).

**Figure S14.** Collinear alignment between sugarcane BAC sequences and their sorghum counterparts.

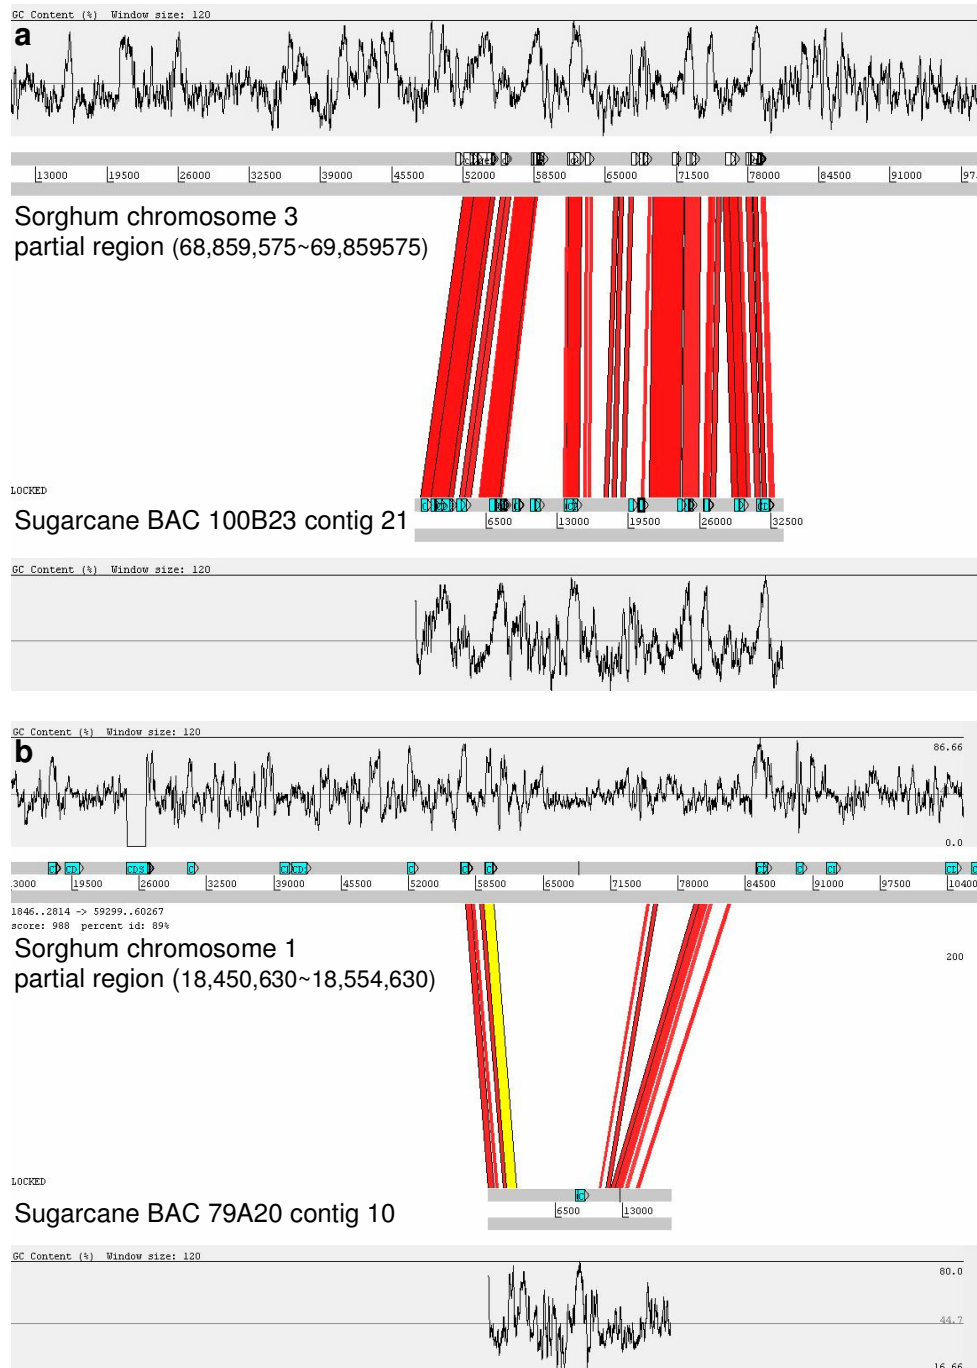



**Figure S15.** Tandem gene duplication in the sugarcane or sorghum genome. These genes were identified by aligning genome sequence with sorghum ESTs. **a.** Gene duplication on sorghum chromosome 7 but not in the corresponding region of sugarcane BAC 118L15 contig 12. Gene A has three copies in sorghum and only one copy in sugarcane. \* indicates the gene missed one exon; \*\* indicates the gene missed one exon and the other exons are 96% rather than 100% identity to the EST sequence. The putative functions of genes A, B, C, and D are 60S ribosomal protein L10A, expressed protein, fiber protein Fb1, and unknown, respectively. **b.** Gene duplication on sugarcane BAC 109D21 contig 11-13-14 but not in the corresponding region of sorghum chromosome 2. Gene A has two copies in sugarcane and one in sorghum. The putative functions of genes A, B, C, and D are serine carboxypeptidase 2, receptor kinase, OSH15 protein, and homeobox transcription factor GNARLY1, respectively.

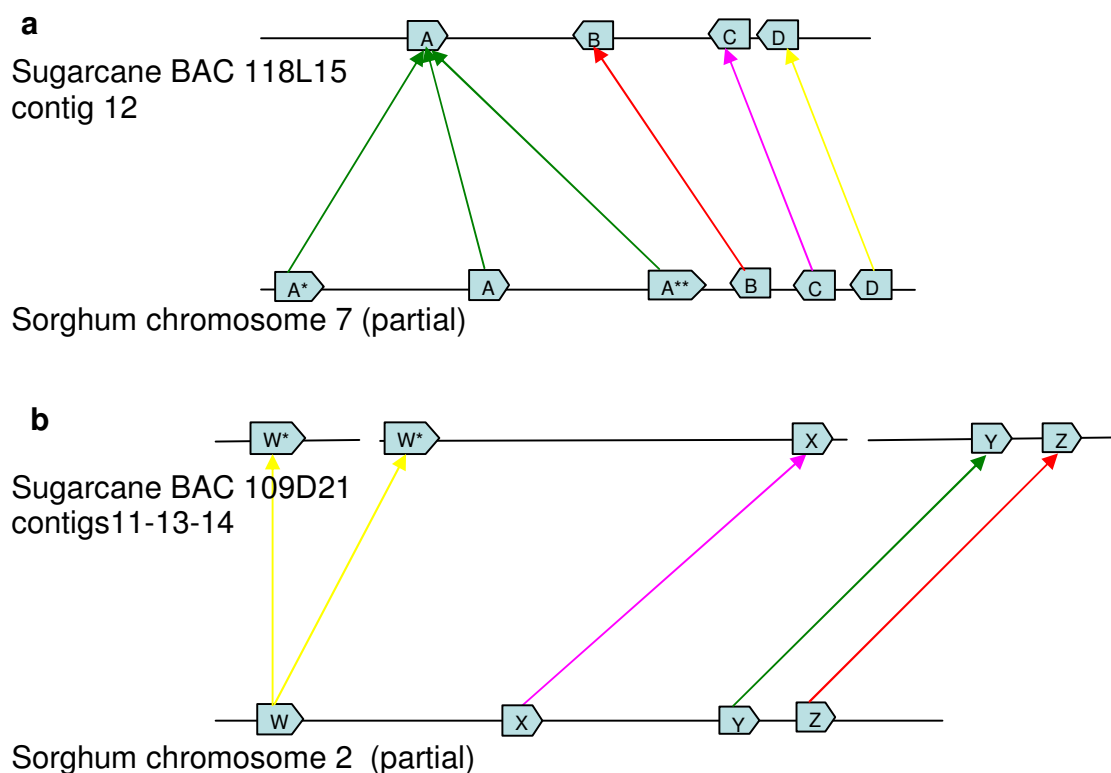

**Supplemental Note 12. Yield of sorghum and other crops****Figure S14. Average worldwide yields of major grain crops.**

Based on statistics from FAO (faostat.fao.org).

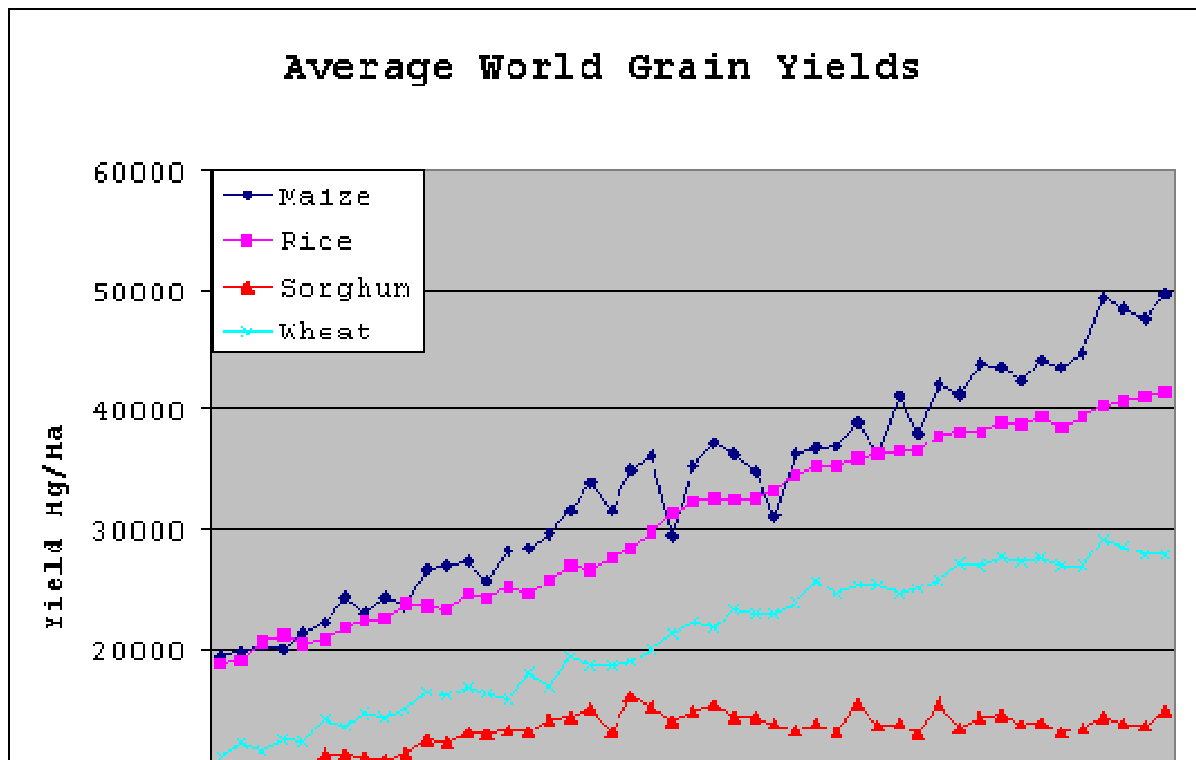

## SUPPLEMENTAL REFERENCES

- 1 SF Altschul, W Gish, W Miller et al., *J Mol Biol* **215**, 403 (1990).
- 2 R.-F. Yeh, L. P. Lim, and C. Burge, *Genome Research* **11**, 803 (2001).
- 3 B.J. Haas, Volfovsky N., Town C.D. et al., *Genome Biology* (3), research0029.1 (2002).
- 4 X.Y. Wang, X.L. Shi, Z. Li et al., *BMC Bioinformatics* **7**, 447 (2006).
- 5 H. Tang, J. E. Bowers, X. Wang et al., *Science* **320**, 486 (2008).
- 6 W. J. Kent, *Genome Res* **12** (4), 656 (2002).
- 7 R. Spangler, *Australian Systematic Botany* **16**, 279 (2003).
- 8 H. J. Price, S. L. Dillon, G. Hodnett et al., *Annalso of Botany* **95**, 219 (2005); K  
Arumuganathan and ED Earle, *Plant Mol Biol Rep.* ( 9), 208 (1991); M. D. Bennett and I.  
J. Leitch, <http://www.rbgekew.org.uk/cval/homepage.html>. (2003).
- 9 R. A. Frederiksen and F. R. Miller, 1972.
- 10 D. G. Peterson, K. S. Boehm, and S. M. Stack, *Plant Molecular Biology Reporter* **15** (2),  
148 (1997).
- 11 D. G. Peterson, S. R. Schulze, E. B. Sciara et al., *Genome Research* **12** (5), 795 (2002).
- 12 D. B. Jaffe, J. Butler, S. Gnerre et al., *Genome Research* **13** (1), 91 (2003).
- 13 J. E. Bowers, M. A. Arias, R. Asher et al., *Proceedings of the National Academy of  
Sciences of the United States of America* **102** (37), 13206 (2005).
- 14 J. S. Kim, P. E. Klein, R. R. Klein et al., *Genetics* **169** (2), 1169 (2005).
- 15 F.A. Feltus, G.E. Hart, K.F. Schertz et al., *Theoretical and Applied Genetics* **112**, 1295  
(2006).
- 16 W. J. Kent, *Genome Research* **4**, 656 (2002).
- 17 J. E. Bowers, C. Abbey, S. Anderson et al., *Genetics* **165**, 367 (2003).
- 18 S. Chopra, V. Brendel, J. B. Zhang et al., *Proceedings of the National Academy of  
Sciences of the United States of America* **96** (26), 15330 (1999).
- 19 J. T. Miller, S. A. Jackson, S. Nasuda et al., *Theoretical and Applied Genetics* **96** (6-7),  
832 (1998).
- 20 A.H. Paterson, J.E. Bowers, and B. A. Chapman, *Proceedings of the National Academy  
of Sciences of the United States of America* **101**, 9903 (2004).
- 21 F. Wei, E. Coe, W. Nelson et al., *PLoS Genet* **3** (7), e123 (2007).
- 22 D. G. Peterson, S. R. Schulze, E. B. Sciara et al., *Genome Res* **12** (5), 795 (2002).
- 23 C. Du, J. Caronna, L. He et al., *BMc Genomics* **9**, 51 (2008).
- 24 K. L. Childs, J. P. Hamilton, W. Zhu et al., *Nucleic Acids Research* **35**, D846 (2007).
- 25 G. Gremme, V. Brendel, M. E. Sparks et al., *Information and Software Technology* **47**  
(15), 965 (2005).
- 26 A. Bairoch, *Molecular & Cellular Proteomics* **4** (8), S2 (2005).
- 27 D. Swarbreck, C. Wilks, P. Lamesch et al., *Nucleic Acids Research* **36**, D1009 (2008).
- 28 H. W. Mewes, C. Amid, R. Arnold et al., *Nucleic Acids Research* **32**, D41 (2004).
- 29 T. Tanaka, B. A. Antonio, S. Kikuchi et al., *Nucleic Acids Research* **36**, D1028 (2008).
- 30 J. E. Allen and S. L. Salzberg, *Bioinformatics* **21** (18), 3596 (2005).
- 31 S. M. J. Searle, J. Gilbert, V. Iyer et al., *Genome Research* **14** (5), 963 (2004).
- 32 B. J. Haas, S. L. Salzberg, W. Zhu et al., *Genome Biology* **9** (2008).
- 33 S. Griffiths-Jones, H. K. Saini, S. van Dongen et al., *Nucleic Acids Research* **36**, D154  
(2008).
- 34 R. D. Finn, J. Tate, J. Mistry et al., *Nucleic Acids Research* **36**, D281 (2008).

- 35 T. Rattei, P. Tischler, R. Arnold et al., *Nucleic Acids Research* **36**, D289 (2008).  
36 L. Li, C. J. Stoeckert, and D. S. Roos, *Genome Research* **13**, 2178 (2003).  
37 S van Dongen, 2000; A.J. Enright, S van Dongen, and C. A. Ouzounis, *Nucleic Acids Res*  
38 **30**, 1575 (2002).  
39 A. H. Paterson, B. A. Chapman, J. Kissinger et al., *Trends Genet.* **22**, 597 (2006).  
40 K. A. Frazer, L. Pachter, A. Poliakov et al., *Nucleic Acids Res* **32**, W273 (2004).  
41 M. Brudno, S. Malde, A. Poliakov et al., *Bioinformatics* **19**, 54i (2003).  
42 S. Schwartz, W. J. Kent, A. Smit et al., *Genome Research* **1**, 103 (2003).  
43 K. Tamura, J. Dudley, M. Nei et al., *Mol Biol Evol* **24** (8), 1596 (2007).  
44 R. Ming, S. Hou, Y. Feng et al., *Nature* **452** (##), 991 (2008).  
45 G. Besnard, B. Offmann, C. Robert et al., *Theor Appl Genet* **105** (2-3), 404 (2002).  
46 R. Wyrich, U. Dressen, S. Brockmann et al., *Plant Mol Biol* **37** (2), 319 (1998).  
47 M. Shenton, V. Fontaine, J. Hartwell et al., *Plant J* **48** (1), 45 (2006).  
48 P. Luchetta, C. Cretin, and P. Gadal, *Mol Gen Genet* **228** (3), 473 (1991).  
49 B. A. Rothermel and T. Nelson, *J Biol Chem* **264** (33), 19587 (1989).  
50 R Chenna, H Sugawara, T. Koike et al., *Nucleic Acids Res* **31**, 3497 (2003); N Saitou and  
51 M. Nei, *Mol Biol Evol* **4**, 406 (1987).  
F Corpet, *Nucleic Acids Res* **16**, 10881 (1988).  
F Chevenet, C. Brun, A.L. Banuls et al., *BMC Bioinformatics* **7**, 439 (2006).
