# Supplementary figures and images for: The Sorghum bicolor genome and the diversification of grasses
Source: Springer Nature journal article supplement (doi:10.1038/nature07723), 2009-01-01

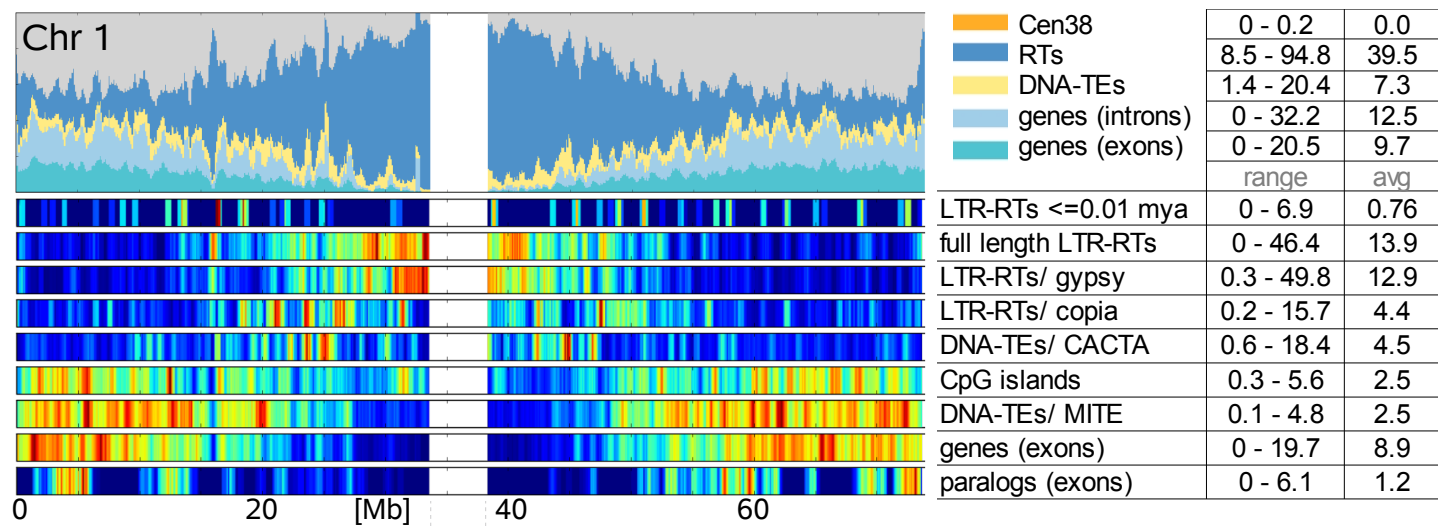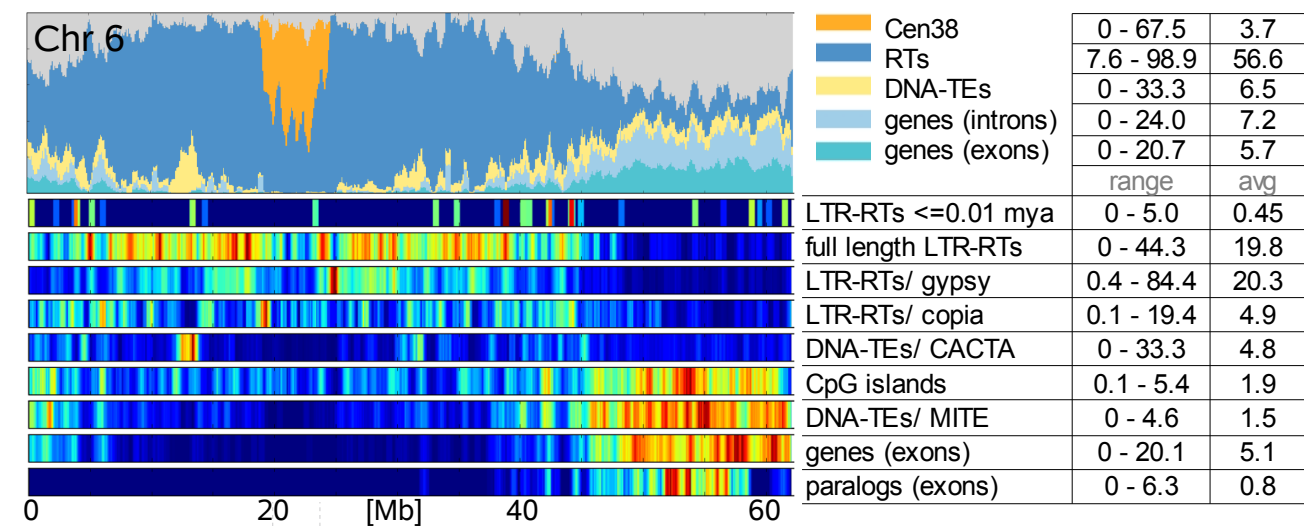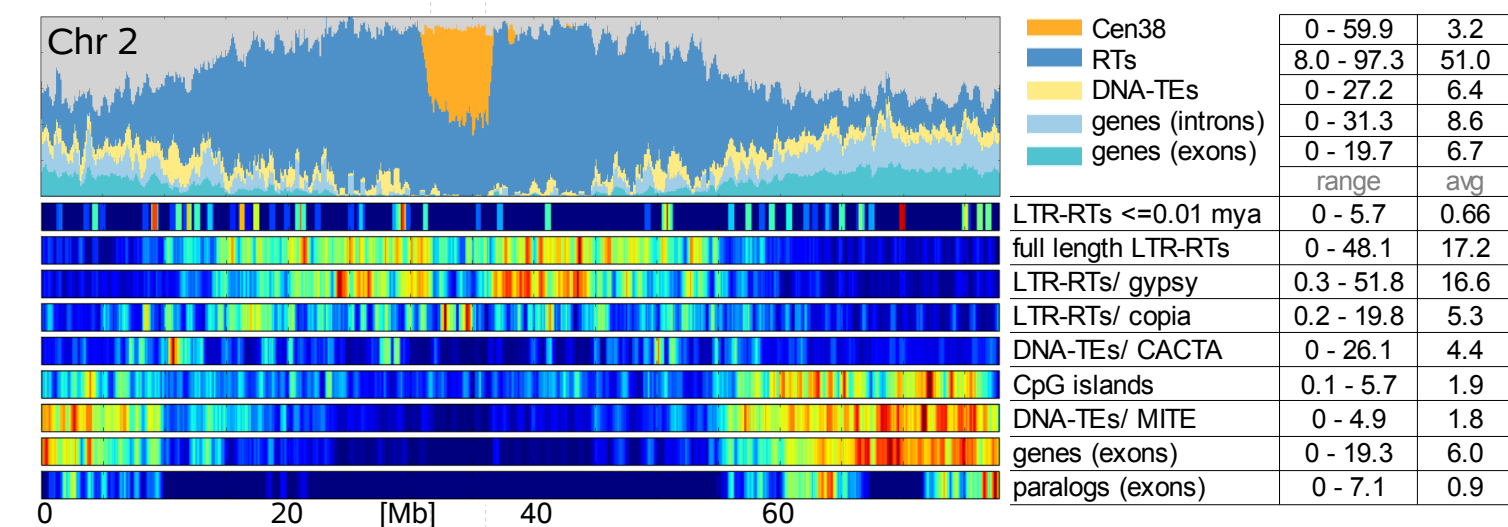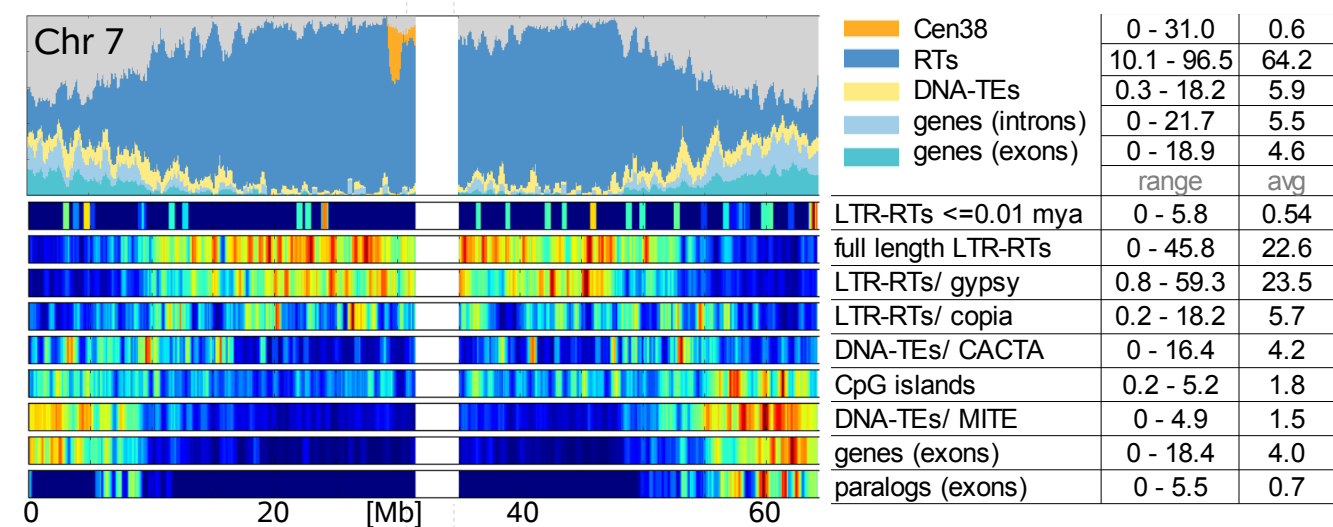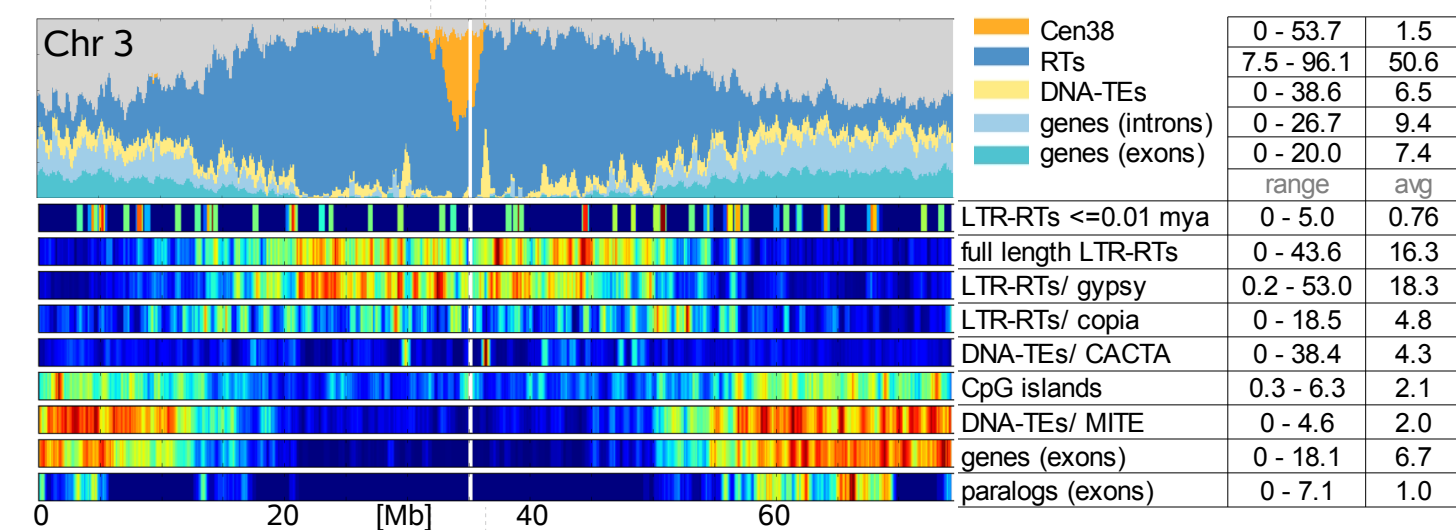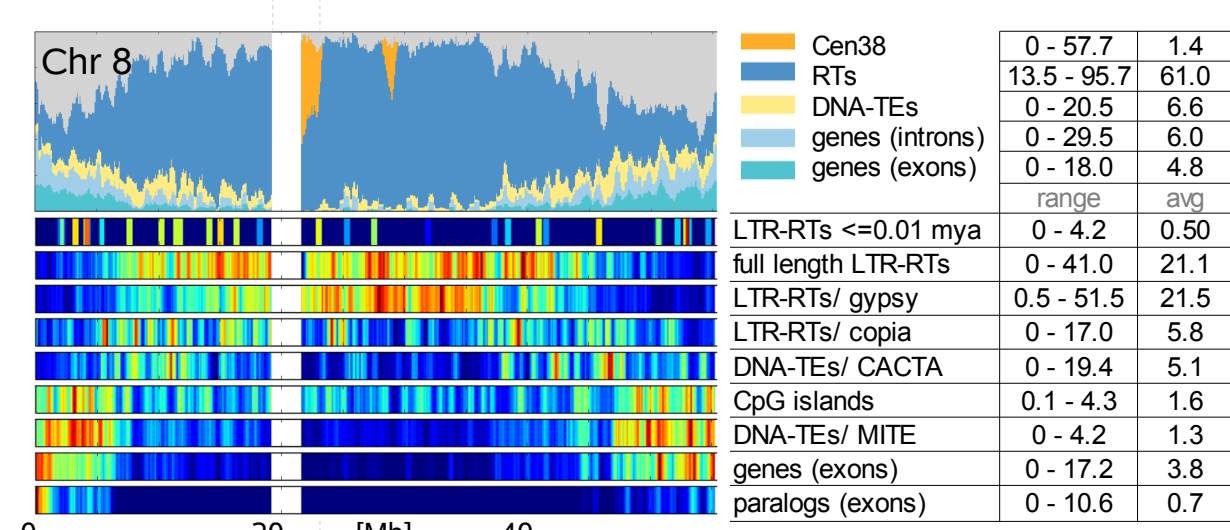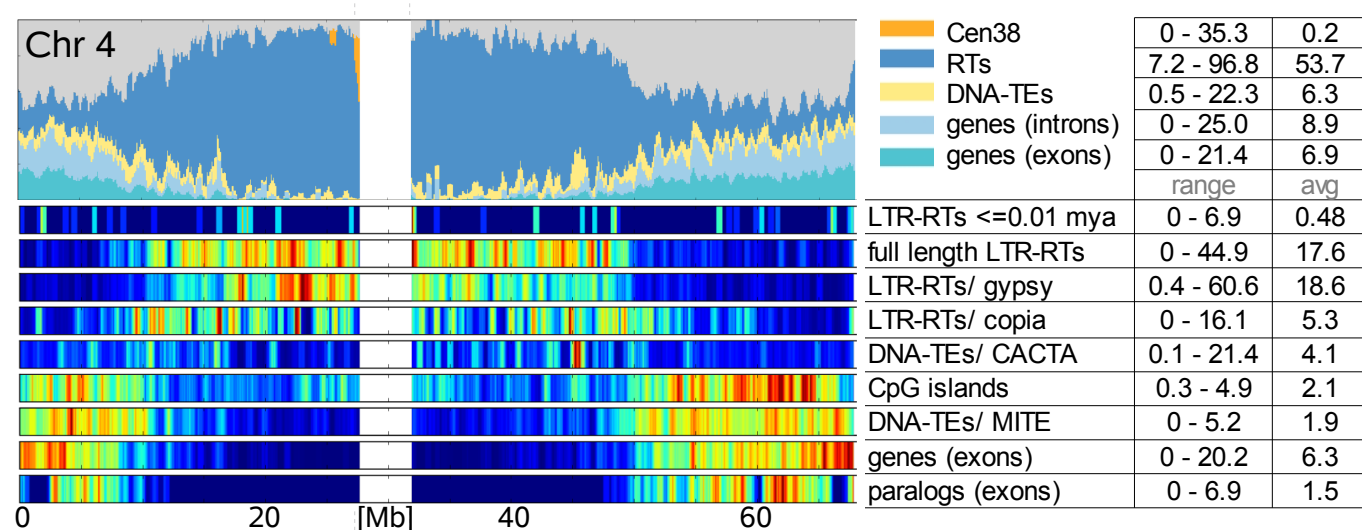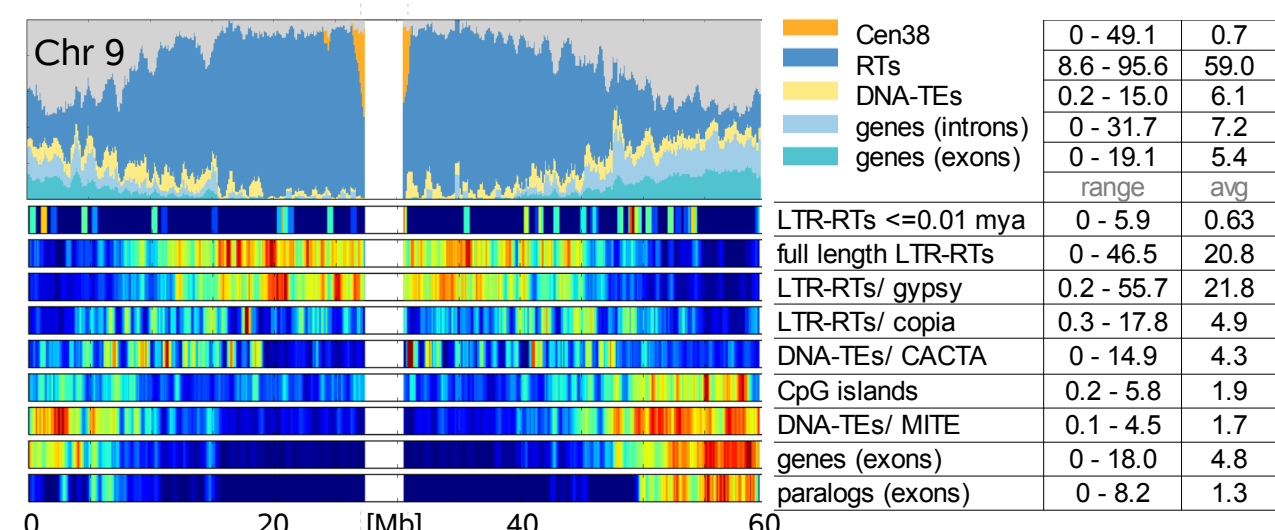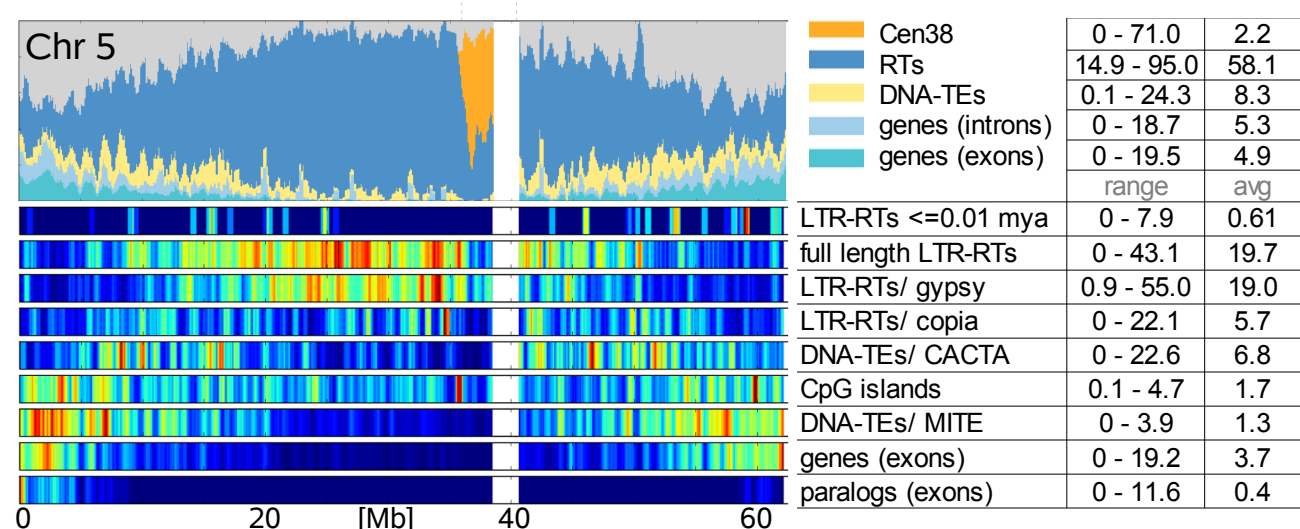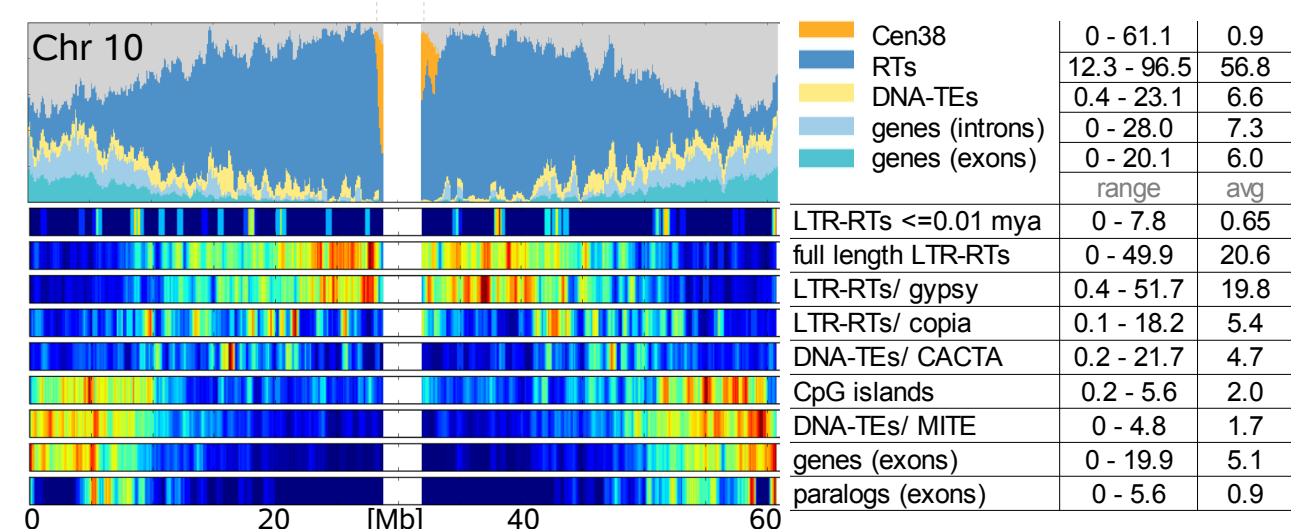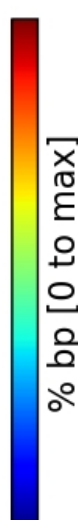

Supplement: 41586_2009_BFnature07723_MOESM290_ESM.pdf [file 41586_2009_BFnature07723_MOESM290_ESM.pdf]
